# Supplementary material for: MLSTar: automatic multilocus sequence typing of bacterial genomes in R
Source: PeerJ. 2018 Jun 15;6:e5098. doi: 10.7717/peerj.5098 (PMC6005169; doi:10.7717/peerj.5098)
Supplement: Supplemental Information 2 — Description of genomic datasets downloaded from the BIGSdb and typed with MLSTar. [file peerj-06-5098-s002.xlsx]

## Sheet: abaumannii_BIGSdb
Supplemental Table S2. Acinetobacter baumannii genomes typed from the BIGSdb.
PATRIC_id	BIGSdb_id	Isolate	Country	Year	Source	cpn60	fusA	gltA	pyrG	recA	rplB	rpoB	ST
106654.18	732	A. baumannii T228	Thailand	2010		22	26	47	14	50	16	47	279
106654.21	3074	A. baumannii 6411	Colombia	2012		55	26	54	14	58	16	47	322
106654.63	3864	A. baumannii UBA2098	USA	NA	environment	22	165	161	14	27	19	25	1182
106654.65	3865	A. baumannii UBA2046	USA	NA	environment	20	164	26	14	26	16	23	1183
106654.66	3847	A. baumannii UBA2042	USA	NA	environment	22	26	29	14	172	16	47	1166
1094469.3	2381	A. baumannii ABNIH5	USA	2007	lower respiratory tract	2	2	2	2	2	2	2	2
1094470.3	2269	A. baumannii ABNIH6	USA	2009	lower respiratory tract	1	1	1	1	5	1	1	1
1094474.3	2271	A. baumannii ABNIH10	USA	2009	blood	1	1	1	1	5	1	1	1
1094475.3	2272	A. baumannii ABNIH11	USA	2009	upper respiratory tract	1	1	1	1	5	1	1	1
1094477.3	2813	A. baumannii ABNIH13	USA	2009	upper respiratory tract	2	2	2	2	2	2	2	2
1094478.3	2815	A. baumannii ABNIH14	USA	2007	upper respiratory tract	2	2	2	2	2	2	2	2
1094479.3	2816	A. baumannii ABNIH15	USA	2007	sputum	2	2	2	2	2	2	2	2
1094480.3	2817	A. baumannii ABNIH16	USA	2007	upper respiratory tract	2	2	2	2	2	2	2	2
1094481.3	2818	A. baumannii ABNIH17	USA	2007	upper respiratory tract	2	2	2	2	2	2	2	2
1094482.3	2382	A. baumannii ABNIH18	USA	2007	sputum	2	2	2	2	2	2	2	2
1094483.3	2268	A. baumannii ABNIH19	USA	2009	upper respiratory tract	1	1	1	1	5	1	1	1
1094484.3	2819	A. baumannii ABNIH20	USA	2009	sputum	2	2	2	2	2	2	2	2
1094486.3	2811	A. baumannii ABNIH22	USA	2009	upper respiratory tract	2	2	2	2	2	2	2	2
1094487.3	2812	A. baumannii ABNIH23	USA	2009	sputum	2	2	2	2	2	2	2	2
1094488.3	2820	A. baumannii ABNIH24	USA	2008	lower respiratory tract	2	2	2	2	2	2	2	2
1096995.4	2761	A. baumannii BJAB07104	China	NA	blood	2	2	2	2	2	2	2	2
1096996.4	2285	A. baumannii BJAB0715	China	2007	CSF	1	3	10	1	4	4	4	23
1096997.4	2762	A. baumannii BJAB0868	China	NA	abdominal fluid	2	2	2	2	2	2	2	2
1100841.3	2760	A. baumannii TYTH-1	Taiwan	2008	blood	2	2	2	2	2	2	2	2
1100842.3	3178	A. baumannii TYTH-2	Taiwan	2007	sputum	2	2	2	2	2	2	2	2
1116234.3	2256	A. baumannii AB5075	USA	2008	other	1	1	1	1	5	1	1	1
1116234.8	2256	A. baumannii AB5075	USA	2008	other	1	1	1	1	5	1	1	1
1149135.4	2650	A. baumannii 107m	Colombia	NA		3	3	2	4	7	2	4	25
1168588.3	2768	A. baumannii Ab11111	USA	NA		2	2	2	2	2	2	2	2
1168590.3	1964	A. baumannii Ab33333	USA	2013		3	71	2	2	5	4	14	419
1168591.3	2371	A. baumannii Ab44444	USA	NA		2	2	2	2	2	2	2	2
1198108.3	2754	A. baumannii AC12	Malaysia	2011	blood	2	2	2	2	2	2	2	2
1200350.3	2377	A. baumannii ABIsac_ColiS	France	NA		2	2	2	2	2	2	2	2
1200351.3	2378	A. baumannii ABIsac_ColiR	France	NA		2	2	2	2	2	2	2	2
1210907.3	2667	A. baumannii BZICU-2	China	2010	sputum	1	5	40	2	7	1	1	218
1216295.3	2808	A. baumannii 53264	Denmark	NA	upper respiratory tract	2	2	2	2	2	2	2	2
1217627.3	2693	A. baumannii NIPH 67	Czech Republic	1992	upper respiratory tract	9	3	2	2	5	4	14	35
1217628.3	2066	A. baumannii NIPH 70	Czech Republic	1992	upper respiratory tract	1	2	2	2	30	1	2	520
1217629.3	2704	A. baumannii NIPH 80	USA	2013		3	2	2	2	7	1	2	37
1217630.3	2663	A. baumannii NIPH 201	Czech Republic	1992	upper respiratory tract	3	2	15	6	6	4	5	38
1217632.3	2682	A. baumannii NIPH 329	Czech Republic	1994	upper respiratory tract	1	2	6	2	3	4	4	11
1217633.3	2286	A. baumannii NIPH 335	Czech Republic	NA	sputum	1	3	2	1	4	4	4	10
1217634.3	1965	A. baumannii NIPH 410	Czech Republic	1996	IV catheter	10	4	3	2	5	1	2	420
1217635.3	2247	A. baumannii NIPH 527	The Netherlands	1984	urine	1	1	1	1	5	1	1	1
1217636.3	2764	A. baumannii NIPH 528	The Netherlands	1982	urine	2	2	2	2	2	2	2	2
1217637.3	2664	A. baumannii NIPH 601	Czech Republic	1993	urine	1	2	2	2	5	1	14	40
1217638.3	1946	A. baumannii ANC 4097	Czech Republic	2011	upper respiratory tract	1	1	1	1	5	1	1	1
1217639.3	2120	A. baumannii NIPH 146	Czech Republic	1993	wound	3	3	2	4	7	2	4	25
1217640.3	2657	A. baumannii NIPH 190	Czech Republic	1993	upper respiratory tract	3	1	5	3	6	1	3	9
1217641.3	2655	A. baumannii NIPH 615	USA	NA		3	5	7	1	7	2	6	12
1217642.3	2765	A. baumannii NIPH 1362	Czech Republic	2000	upper respiratory tract	2	13	2	2	2	2	2	47
1217643.3	2731	A. baumannii NIPH 1669	The Netherlands	1997	blood	3	3	2	2	3	1	3	3
1217644.3	2297	A. baumannii NIPH 1734	Czech Republic	NA	sputum	6	6	8	2	3	5	4	15
1217645.3	2770	A. baumannii NIPH 2061	Czech Republic	2003	IV catheter	2	2	2	2	2	2	2	2
1217646.3	2769	A. baumannii NIPH 24	Czech Republic	1991	urine	2	2	2	2	2	2	2	2
1217647.3	2997	A. baumannii NIPH 60	Czech Republic	NA	sputum	8	1	14	3	12	1	13	34
1217653.3	2084	A. baumannii ANC 3680	Czech Republic	2008	environment	88	96	87	51	93	42	83	539
1217654.3	2033	A. baumannii NIPH 13	Czech Republic	1991	wound	15	80	69	8	19	10	19	484
1217670.3	3009	A. baumannii NIPH 2119	Czech Republic	NA	sputum	20	26	26	18	27	19	23	76
1217673.3	2123	A. baumannii ANC 3678	Czech Republic	2008	environment	66	20	48	35	72	18	62	457
1217689.3	2116	A. baumannii ANC 4052	USA	NA	blood	81	93	77	40	86	44	74	568
1217690.3	2102	A. baumannii ANC 3811	Czech Republic	2009	environment	73	81	70	37	78	40	67	556
1217691.3	2114	A. baumannii ANC 4050	USA	NA	blood	87	84	73	44	92	41	75	567
1217985.3	2125	A. baumannii NIPH 386	Czech Republic	1996	sputum	20	26	26	14	26	16	23	410
1221244.3	1950	A. baumannii AB_1536-8	USA	2012		1	3	2	2	5	8	12	413
1221245.3	2785	A. baumannii AB_1582-8	USA	NA	sputum	2	2	2	2	2	2	2	2
1221246.3	2956	A. baumannii AB_1583-8	USA	2012		26	72	2	2	29	4	5	422
1221247.3	1957	A. baumannii AB_1594-8	USA	2012	sputum	1	2	2	2	11	1	5	417
1221248.3	2786	A. baumannii AB_1595-8	USA	NA	urine	2	2	2	2	2	2	2	2
1221249.3	2668	A. baumannii AB_1649-8	USA	NA	other	3	3	3	4	7	4	4	113
1221250.3	2669	A. baumannii AB_1650-8	USA	NA	other	3	3	3	4	7	4	4	113
1221251.3	2787	A. baumannii AB_1766_8	USA	NA	blood	2	2	2	2	2	2	2	2
1221252.3	1975	A. baumannii AB_2007-09-110-01-7	USA	2012	environment (medical)	3	74	2	3	6	1	16	429
1221253.3	2943	A. baumannii AB_2007-16-25-01-7	USA	2007	environment (medical)	40	3	15	2	40	4	4	241
1221254.3	2944	A. baumannii AB_2007-16-27-01	USA	2007	environment (medical)	40	3	15	2	40	4	4	241
1221255.3	2375	A. baumannii AB_2008-15-34-7	USA	2008	sputum	2	2	2	2	2	2	2	2
1221256.3	1952	A. baumannii AB_2008-15-45	USA	2012	lower respiratory tract	2	2	2	2	68	2	2	415
1221257.3	1954	A. baumannii AB_2008-15-52	USA	2012	wound	1	2	2	2	4	1	4	416
1221258.3	2646	A. baumannii AB_2008-15-69	USA	2008		3	3	2	4	7	2	4	25
1221259.3	1953	A. baumannii AB_2008-15-70	USA	2012	upper respiratory tract	2	2	2	2	68	2	2	415
1221260.3	1955	A. baumannii AB_2008-15-71	USA	2012	sputum	1	2	2	2	4	1	4	416
1221261.3	1958	A. baumannii AB_2008-23-01-01-7	USA	2012	environment (medical)	1	2	2	2	11	1	5	417
1221262.3	2806	A. baumannii AB_2008-23-07-01-7	USA	NA	environment (medical)	2	2	2	2	2	2	2	2
1221263.3	1956	A. baumannii AB_2009-04-01-7	USA	2012	wound	1	2	2	2	11	1	5	417
1221264.3	2799	A. baumannii AB_2009-04-02-7	USA	NA	sputum	2	2	2	2	2	2	2	2
1221265.3	2789	A. baumannii AB_515-8	USA	NA	sputum	2	2	2	2	2	2	2	2
1221266.3	2790	A. baumannii AB_908-12	USA	NA	environment (medical)	2	2	2	2	2	2	2	2
1221267.3	2260	A. baumannii AB_908-13	USA	NA	urine	1	1	1	1	5	1	1	1
1221268.3	2800	A. baumannii AB_908-14-7	USA	NA	lower respiratory tract	2	2	2	2	2	2	2	2
1221269.3	1959	A. baumannii AB_909-01-7	USA	2012	blood	1	2	2	2	11	1	5	417
1221270.3	2259	A. baumannii AB_909-02-7	USA	2007	sputum	1	1	1	1	5	1	1	1
1221271.3	2801	A. baumannii AB_909-05	USA	NA	sputum	2	2	2	2	2	2	2	2
1221272.3	2802	A. baumannii AB_909-14-7	USA	NA	wound	2	2	2	2	2	2	2	2
1221273.3	2309	A. baumannii AB_TG19617	USA	NA		3	2	2	7	9	4	5	438
1221274.3	1960	A. baumannii AB_TG2018	USA	2012	sputum	1	2	2	2	11	1	5	417
1221275.3	2791	A. baumannii AB_TG2022	USA	NA	blood	2	2	2	2	2	2	2	2
1221276.3	2792	A. baumannii AB_TG2023	USA	NA	blood	2	2	2	2	2	2	2	2
1221277.3	2793	A. baumannii AB_TG2026	USA	NA	wound	2	2	2	2	2	2	2	2
1221278.3	1937	A. baumannii AB_TG2028	USA	2013	sputum	1	1	1	2	65	1	5	406
1221279.3	1936	A. baumannii AB_TG2030	USA	2013	sputum	1	1	1	2	65	1	5	406
1221280.3	1938	A. baumannii AB_TG2031	USA	2013	sputum	1	1	1	2	65	1	5	406
1221281.3	1939	A. baumannii AB_TG2032	USA	2013	sputum	1	1	1	2	65	1	5	406
1221282.4	2794	A. baumannii AB_TG2631	USA	NA	blood	2	2	2	2	2	2	2	2
1221283.3	2795	A. baumannii AB_TG27323	USA	NA		2	2	2	2	2	2	2	2
1221284.3	2803	A. baumannii AB_TG27327	USA	NA	wound	2	2	2	2	2	2	2	2
1221285.3	2796	A. baumannii AB_TG27331	USA	NA	sputum	2	2	2	2	2	2	2	2
1221286.3	2804	A. baumannii AB_TG27335	USA	NA		2	2	2	2	2	2	2	2
1221287.3	2945	A. baumannii AB_TG27339	USA	NA	sputum	40	3	15	2	40	4	4	241
1221288.3	1967	A. baumannii AB_TG27343	USA	2012	wound	26	72	2	2	29	4	5	422
1221290.3	2797	A. baumannii AB_TG5064	USA	NA	blood	2	2	2	2	2	2	2	2
1221292.3	2261	A. baumannii TG19582	USA	NA		1	1	1	1	5	1	1	1
1222031.3	2810	A. baumannii AB1H8	China	2005	sputum	2	2	2	2	2	2	2	2
1222032.3	2314	A. baumannii AB4A3	China	2006	wound	3	37	2	2	42	1	14	255
1222033.3	1972	A. baumannii AB405E4	China	2006	blood	3	4	2	2	5	1	2	426
1223564.3	2783	A. baumannii ZWS1122	China	2011	blood	2	2	2	2	2	2	2	2
1224141.3	2784	A. baumannii ZWS1219	China	2011	blood	2	2	2	2	2	2	2	2
1224165.3	2373	A. baumannii ABNIH25	USA	NA	upper respiratory tract	2	2	2	2	2	2	2	2
1224166.3	2814	A. baumannii ABNIH26	USA	2007		2	2	2	2	2	2	2	2
1224747.3	2733	A. baumannii AC30	Malaysia	2011	upper respiratory tract	2	2	2	2	2	2	2	2
1236532.3	2353	A. baumannii JCM 6841	USA	NA		3	2	2	7	9	1	5	52
1278070.3	1966	A. baumannii MSP4-16	India	2010	environment	3	2	2	7	5	1	5	421
1293574.3	2821	A. baumannii 48055	Denmark	2010	upper respiratory tract	2	2	2	2	2	2	2	2
1310554.3	2892	A. baumannii 1036938	USA	NA	stool/rectal swab	2	2	2	2	2	2	2	2
1310555.3	2417	A. baumannii 993520	USA	NA	stool/rectal swab	2	2	2	2	2	2	2	2
1310556.3	2398	A. baumannii 17534	USA	NA	stool/rectal swab	2	2	2	2	2	2	2	2
1310557.3	2408	A. baumannii 959073	USA	NA	stool/rectal swab	2	2	2	2	2	2	2	2
1310558.3	2396	A. baumannii 136706	USA	NA		2	2	2	2	2	2	2	2
1310559.3	2623	A. baumannii 987421	USA	NA	stool/rectal swab	2	2	2	2	2	2	2	2
1310560.3	2412	A. baumannii 564012	USA	NA	stool/rectal swab	2	2	2	2	2	2	2	2
1310561.3	2409	A. baumannii 942133	USA	NA	stool/rectal swab	2	2	2	2	2	2	2	2
1310562.3	2413	A. baumannii 472237-1196	USA	NA	stool/rectal swab	2	2	2	2	2	2	2	2
1310563.3	2672	A. baumannii 972082	USA	NA	stool/rectal swab	7	7	2	2	8	4	4	16
1310564.3	2670	A. baumannii 1043794	USA	NA	stool/rectal swab	7	7	2	2	8	4	4	16
1310567.3	2397	A. baumannii 1046674	USA	NA		2	2	2	2	2	2	2	2
1310568.3	2625	A. baumannii 916567	USA	NA	stool/rectal swab	2	2	2	2	2	2	2	2
1310569.3	2393	A. baumannii 1043903	USA	NA		2	2	2	2	2	2	2	2
1310570.3	2891	A. baumannii 1046051	USA	NA	stool/rectal swab	2	2	2	2	2	2	2	2
1310571.3	2073	A. baumannii 1032241	USA	NA	stool/rectal swab	1	2	2	2	4	51	4	527
1310572.3	2618	A. baumannii 1032359	USA	NA	stool/rectal swab	2	2	2	2	2	2	2	2
1310573.3	2624	A. baumannii 18689	USA	NA	stool/rectal swab	2	2	2	2	2	2	2	2
1310574.3	2394	A. baumannii 1042969-1265	USA	NA		2	2	2	2	2	2	2	2
1310577.3	2895	A. baumannii 532413	USA	NA	stool/rectal swab	2	2	2	2	2	2	2	2
1310578.3	2415	A. baumannii 34001	USA	NA	stool/rectal swab	2	2	2	2	2	2	2	2
1310579.3	2894	A. baumannii 58452	USA	NA	stool/rectal swab	2	2	2	2	2	2	2	2
1310580.3	2083	A. baumannii 1297	USA	NA	stool/rectal swab	95	52	2	2	4	4	4	537
1310581.3	2414	A. baumannii 34654	USA	NA	stool/rectal swab	2	2	102	2	2	2	2	670
1310582.3	2420	A. baumannii 662545-1347	USA	NA	stool/rectal swab	2	2	2	2	2	2	2	2
1310583.3	2893	A. baumannii 1051176	USA	NA	stool/rectal swab	2	2	2	2	2	2	2	2
1310584.3	2622	A. baumannii 23037	USA	NA	stool/rectal swab	2	2	2	2	2	2	2	2
1310585.3	2069	A. baumannii 1051830	USA	NA	stool/rectal swab	2	2	2	2	99	2	2	523
1310586.3	2395	A. baumannii 1031433	USA	NA		2	2	2	2	2	2	2	2
1310587.3	2418	A. baumannii 947299	USA	NA	stool/rectal swab	2	2	2	2	2	2	2	2
1310588.3	2324	A. baumannii 562700	USA	NA	stool/rectal swab	1	2	2	2	4	1	4	416
1310589.3	2410	A. baumannii 929679-2095	USA	NA	stool/rectal swab	2	2	2	2	2	2	2	2
1310590.3	2319	A. baumannii 1040094	USA	NA	stool/rectal swab	1	2	2	2	4	1	4	416
1310591.3	2325	A. baumannii 942194	USA	NA	stool/rectal swab	1	104	2	2	4	1	4	650
1310592.3	2320	A. baumannii 1039621	USA	NA	stool/rectal swab	1	2	2	2	4	1	4	416
1310593.3	2411	A. baumannii 796380-2102	USA	NA	stool/rectal swab	2	2	2	2	2	2	2	2
1310594.3	2419	A. baumannii 653020	USA	NA	stool/rectal swab	2	2	2	2	2	2	2	2
1310595.3	2068	A. baumannii 29280	USA	NA	stool/rectal swab	3	3	89	2	28	1	5	522
1310596.3	2318	A. baumannii 1075025	USA	NA	stool/rectal swab	1	2	2	2	4	1	5	514
1310597.3	2890	A. baumannii 1247182	USA	NA	stool/rectal swab	2	2	2	2	2	2	2	2
1310598.4	2739	A. baumannii 1121032	USA	NA	stool/rectal swab	3	3	2	2	28	1	5	500
1310599.3	2689	A. baumannii 781407	USA	NA	stool/rectal swab	1	1	2	2	3	4	4	32
1310600.3	2416	A. baumannii 1289546	USA	NA	stool/rectal swab	2	2	2	2	2	2	2	2
1310602.3	2626	A. baumannii 96512	USA	NA	stool/rectal swab	2	2	2	2	2	2	2	2
1310604.3	2653	A. baumannii 984213	USA	NA	stool/rectal swab	3	3	2	4	7	2	4	25
1310606.3	2074	A. baumannii 1297549	USA	NA	stool/rectal swab	5	98	4	1	3	4	4	528
1310607.3	2055	A. baumannii 625974		NA	stool/rectal swab	1	1	7	5	3	1	16	509
1310609.3	3000	A. baumannii 1289694	USA	2014	stool/rectal swab	17	20	23	10	20	18	27	93
1310610.3	2405	A. baumannii 647609	USA	NA	stool/rectal swab	2	2	2	2	2	2	2	2
1310611.3	2289	A. baumannii 466760	USA	NA	stool/rectal swab	1	3	2	1	4	4	4	10
1310615.3	2710	A. baumannii 1396970	USA	NA	stool/rectal swab	20	26	26	14	26	16	23	410
1310616.3	2407	A. baumannii 400834	USA	NA	stool/rectal swab	2	2	2	2	2	2	2	2
1310617.3	2400	A. baumannii 1406750	USA	NA	stool/rectal swab	2	2	2	2	2	2	2	2
1310618.3	2946	A. baumannii 118362	USA	NA	stool/rectal swab	40	3	15	2	40	4	4	241
1310619.3	2075	A. baumannii 1419130	USA	NA	stool/rectal swab	3	3	7	52	7	1	4	529
1310620.3	2399	A. baumannii 1294217	USA	NA	stool/rectal swab	2	2	2	2	2	2	2	2
1310622.6	2082	A. baumannii 1035119	USA	NA	stool/rectal swab	3	3	11	54	5	1	2	536
1310624.3	2322	A. baumannii 1202252	USA	NA	stool/rectal swab	1	2	2	2	4	1	4	416
1310625.3	2989	A. baumannii 496487	USA	NA	stool/rectal swab	5	2	39	2	3	1	5	499
1310626.3	2999	A. baumannii 21871	USA	2014	stool/rectal swab	22	26	47	14	50	16	47	279
1310627.3	2635	A. baumannii 1284800	USA	NA	stool/rectal swab	2	2	2	2	2	2	2	2
1310628.3	2671	A. baumannii 1267820	USA	NA	stool/rectal swab	7	3	2	1	7	1	4	103
1310630.3	2052	A. baumannii 99063	USA	NA	stool/rectal swab	3	4	16	1	3	1	4	506
1310631.3	2634	A. baumannii 15827	USA	NA	stool/rectal swab	2	2	2	2	2	2	2	2
1310633.3	2753	A. baumannii 940793	USA	NA	stool/rectal swab	3	3	2	2	28	1	5	500
1310634.3	2049	A. baumannii 4749	USA	NA	stool/rectal swab	27	4	56	2	7	1	4	503
1310636.3	2654	A. baumannii 1429530	USA	NA	stool/rectal swab	3	3	2	4	7	2	4	25
1310637.3	3001	A. baumannii 809848	USA	2014	stool/rectal swab	45	20	44	10	25	29	20	666
1310640.3	2058	A. baumannii 342950	USA	NA	stool/rectal swab	3	37	3	2	4	1	9	512
1310641.3	2705	A. baumannii 1440422		NA		3	4	2	2	7	1	2	203
1310643.3	2054	A. baumannii 299505	USA	NA	stool/rectal swab	12	77	7	2	15	4	5	508
1310644.3	2402	A. baumannii 1159076	USA	NA	stool/rectal swab	2	2	2	2	2	2	2	2
1310645.3	2720	A. baumannii 1461963	USA	NA	stool/rectal swab	3	3	6	2	3	1	5	49
1310646.3	2404	A. baumannii 1462234	USA	NA	stool/rectal swab	2	2	2	2	2	2	2	2
1310648.4	2976	A. baumannii 110912	USA	2014	stool/rectal swab	5	2	39	2	3	1	5	499
1310649.3	2406	A. baumannii 1465485	USA	NA	stool/rectal swab	2	2	2	2	2	2	2	2
1310650.3	2401	A. baumannii 724909	USA	NA	stool/rectal swab	2	2	2	2	2	2	2	2
1310653.3	2977	A. baumannii 951631	USA	NA	stool/rectal swab	5	2	39	2	3	1	5	499
1310654.3	2899	A. baumannii 1291820	USA	NA	stool/rectal swab	2	2	2	2	2	2	2	2
1310655.3	2896	A. baumannii 1277411	USA	NA	stool/rectal swab	2	2	2	2	2	2	2	2
1310656.3	2931	A. baumannii 1146103	USA	NA	stool/rectal swab	2	2	2	2	2	2	2	2
1310657.3	2727	A. baumannii 1096934	USA	NA	stool/rectal swab	25	3	6	2	28	1	29	78
1310659.3	2051	A. baumannii 1106579	USA	NA	stool/rectal swab	13	1	7	3	6	1	16	505
1310661.3	2729	A. baumannii 855125	USA	NA	stool/rectal swab	25	3	6	2	28	1	29	78
1310662.3	2290	A. baumannii 50595	USA	NA	stool/rectal swab	1	3	2	1	4	4	4	10
1310663.3	2897	A. baumannii 1440750	USA	NA	stool/rectal swab	2	2	2	2	2	2	2	2
1310665.3	2691	A. baumannii 1525283	USA	NA	stool/rectal swab	1	1	2	2	3	4	4	32
1310666.3	2424	A. baumannii 1552818	USA	NA	stool/rectal swab	2	2	2	2	2	2	2	2
1310668.3	2990	A. baumannii 754286	USA	NA	stool/rectal swab	5	2	39	2	3	1	5	499
1310669.3	2717	A. baumannii 6112	USA	NA	stool/rectal swab	20	26	26	14	26	16	25	71
1310672.3	2421	A. baumannii 554515	USA	NA	stool/rectal swab	2	2	2	2	2	2	2	2
1310673.3	2991	A. baumannii 1499986	USA	NA	stool/rectal swab	5	2	39	2	3	1	5	499
1310674.3	2050	A. baumannii 1546444	USA	NA	stool/rectal swab	3	3	6	1	29	4	52	504
1310675.3	2898	A. baumannii 1526966	USA	NA	stool/rectal swab	2	2	2	2	2	2	2	2
1310676.3	2326	A. baumannii 43926	USA	NA	stool/rectal swab	1	2	2	2	4	1	5	514
1310677.3	3003	A. baumannii 766875	USA	2014	stool/rectal swab	47	47	50	14	26	16	49	224
1310679.3	2900	A. baumannii 1552865	USA	NA	stool/rectal swab	2	2	2	2	2	2	2	2
1310681.3	3002	A. baumannii 1542444	USA	2014	stool/rectal swab	104	108	104	10	72	59	100	675
1310684.3	2079	A. baumannii 83444	USA	NA	stool/rectal swab	13	1	7	3	101	1	16	533
1310686.3	2978	A. baumannii 397971	USA	NA	stool/rectal swab	5	2	39	2	3	1	5	499
1310688.3	2690	A. baumannii 144107	USA	NA	stool/rectal swab	3	41	6	1	3	4	5	154
1310689.3	3004	A. baumannii 1578804	USA	2014	stool/rectal swab	23	20	28	10	25	18	20	667
1310691.3	2060	A. baumannii 42887	USA	NA	stool/rectal swab	1	2	2	2	4	1	5	514
1310692.3	2065	A. baumannii 532279	USA	NA	stool/rectal swab	3	2	2	1	9	4	14	519
1310693.4	2675	A. baumannii 655378	USA	NA	stool/rectal swab	7	7	2	2	8	4	4	16
1310694.3	2673	A. baumannii 232184	USA	NA	stool/rectal swab	7	7	2	2	8	4	4	16
1310695.3	2711	A. baumannii 259052	USA	NA	stool/rectal swab	20	26	26	14	26	16	25	71
1310696.88	2712	A. baumannii 1592897		NA		20	26	26	14	26	16	25	71
1310698.3	2423	A. baumannii 1593273	USA	NA	stool/rectal swab	2	2	2	2	2	2	2	2
1310699.3	2422	A. baumannii 1575710	USA	NA	stool/rectal swab	2	2	2	2	2	2	2	2
1310700.3	2367	A. baumannii 1598530	USA	NA	stool/rectal swab	3	17	7	2	18	1	2	56
1310701.3	2674	A. baumannii 268680	USA	NA	stool/rectal swab	7	7	2	2	8	4	4	16
1310702.3	2728	A. baumannii 831240	USA	NA	stool/rectal swab	25	3	6	2	28	1	29	78
1310703.3	2328	A. baumannii 1417041	USA	NA	stool/rectal swab	35	1	11	7	9	25	2	108
1310705.3	2713	A. baumannii 694762	USA	NA	stool/rectal swab	20	26	26	14	26	16	23	410
1310706.3	2056	A. baumannii 1412924	USA	NA	stool/rectal swab	3	53	56	2	9	8	2	510
1310707.3	2080	A. baumannii 318814	USA	NA	stool/rectal swab	3	3	2	2	102	4	4	534
1310708.3	2441	A. baumannii 923118	USA	NA	stool/rectal swab	2	2	2	2	2	2	2	2
1310710.3	2291	A. baumannii 3390	USA	NA	stool/rectal swab	1	3	2	1	4	4	4	10
1310712.3	2444	A. baumannii 655555	USA	NA	stool/rectal swab	2	2	2	2	2	2	2	2
1310713.3	2454	A. baumannii 1471012	USA	NA	stool/rectal swab	2	2	2	2	2	2	2	2
1310716.3	2453	A. baumannii 1482820	USA	NA	stool/rectal swab	2	2	2	2	113	2	2	671
1310717.3	2445	A. baumannii 1457504	USA	NA	stool/rectal swab	2	2	2	2	2	2	2	2
1310718.3	2455	A. baumannii 1475764	USA	NA	stool/rectal swab	2	2	2	2	2	2	2	2
1310719.3	2981	A. baumannii 607805	USA	NA	stool/rectal swab	5	2	39	2	3	1	5	499
1310721.3	2983	A. baumannii 1533268	USA	NA	stool/rectal swab	5	2	39	2	3	1	5	499
1310722.3	2904	A. baumannii 825610	USA	NA	stool/rectal swab	2	2	2	2	2	2	2	2
1310724.3	2063	A. baumannii 1245249	USA	NA	stool/rectal swab	66	21	48	35	26	18	62	517
1310725.3	2692	A. baumannii 1062314	USA	NA	sputum	12	3	18	2	17	4	5	54
1310727.3	2442	A. baumannii 836190	USA	NA	sputum	2	2	2	2	2	2	2	2
1310729.3	2907	A. baumannii 23671	USA	NA	sputum	2	2	2	2	2	2	2	2
1310730.3	2905	A. baumannii 1207552	USA	NA	sputum	2	2	2	2	2	2	2	2
1310731.3	2450	A. baumannii 1178044	USA	NA	sputum	2	2	2	2	2	2	2	2
1310732.3	2449	A. baumannii 1271651	USA	NA	sputum	2	2	2	2	2	2	2	2
1310733.4	2982	A. baumannii 1195185_11	USA	NA	sputum	5	2	39	2	3	1	5	499
1310734.3	2076	A. baumannii 216872	USA	NA	sputum	20	26	90	14	26	16	47	530
1310735.3	2443	A. baumannii 737393	USA	NA	sputum	2	2	2	2	2	2	2	2
1310736.3	2996	A. baumannii 233846	USA	NA	sputum	3	2	7	2	7	1	3	126
1310737.3	2744	A. baumannii 1271213	USA	NA	sputum	3	3	2	2	28	1	5	500
1310738.3	2906	A. baumannii 273929	USA	NA	stool/rectal swab	2	2	2	2	2	2	2	2
1310739.3	2440	A. baumannii 1045092	USA	NA	sputum	2	2	2	2	2	2	2	2
1310740.3	2980	A. baumannii 457946	USA	NA	sputum	5	2	39	2	3	1	5	499
1310741.3	2438	A. baumannii 73736	USA	NA	sputum	2	2	2	2	2	2	2	2
1310742.3	2745	A. baumannii 1188188	USA	NA	sputum	3	3	2	2	28	1	5	500
1310743.3	2448	A. baumannii 1264936	USA	NA	sputum	2	2	2	2	2	2	2	2
1310744.3	2046	A. baumannii 1237893	USA	NA	sputum	3	3	2	2	28	1	5	500
1310745.3	2742	A. baumannii 480175	USA	NA	sputum	3	3	2	2	28	1	5	500
1310746.3	2437	A. baumannii 1287985	USA	NA	sputum	2	2	2	2	2	1	2	195
1310747.3	2451	A. baumannii 1095464	USA	NA	sputum	2	2	2	2	2	2	2	2
1310748.3	2081	A. baumannii 846928	USA	NA	sputum	3	3	6	2	103	4	4	535
1310749.3	2439	A. baumannii 10519	USA	NA	sputum	2	2	2	2	2	2	2	2
1310750.3	2676	A. baumannii 1064293_45	USA	NA	sputum	7	7	2	2	8	4	4	16
1310751.3	2452	A. baumannii 1022959	USA	NA	sputum	2	2	2	2	2	2	2	2
1310752.3	2721	A. baumannii 1293320	USA	NA	sputum	3	3	6	2	3	1	5	49
1310753.3	2447	A. baumannii 1296252	USA	NA	sputum	2	2	2	2	2	2	2	2
1310754.3	2446	A. baumannii 2887	USA	NA	sputum	2	2	2	2	2	2	2	2
1310755.3	2461	A. baumannii 628418	USA	NA	sputum	2	2	2	2	2	2	2	2
1310757.3	2458	A. baumannii 755829	USA	NA	sputum	2	2	2	2	2	2	2	2
1310758.3	2459	A. baumannii 1266220	USA	NA	sputum	2	2	2	2	2	2	2	2
1310760.3	2067	A. baumannii 1406589	USA	NA	sputum	3	88	2	2	28	1	5	521
1310761.3	2716	A. baumannii 88816	USA	NA	sputum	20	26	26	14	26	16	25	71
1310762.3	2702	A. baumannii 1391434	USA	NA	sputum	1	52	2	2	9	4	2	285
1310763.3	2467	A. baumannii 213697	USA	NA	sputum	2	2	2	2	2	2	2	2
1310765.3	2457	A. baumannii 1294222	USA	NA	sputum	2	2	2	2	2	2	2	2
1310767.3	2468	A. baumannii 1237202	USA	NA	sputum	2	2	2	2	2	2	2	2
1310768.3	2472	A. baumannii 1397513	USA	NA	sputum	2	2	2	2	2	2	2	2
1310769.3	2746	A. baumannii 1276470-86	USA	NA	sputum	3	3	2	2	28	1	5	500
1310770.3	2332	A. baumannii 1295549	USA	NA	sputum	40	1	6	2	102	1	2	652
1310771.3	2331	A. baumannii 1058283	USA	NA	sputum	1	2	2	2	4	1	4	416
1310772.3	2715	A. baumannii 1130196	USA	NA	sputum	59	26	59	14	23	16	47	395
1310774.3	2460	A. baumannii 1232509	USA	NA	sputum	2	2	2	2	2	2	2	2
1310775.3	2470	A. baumannii 1392509	USA	NA	sputum	2	2	2	2	2	2	2	2
1310776.3	2987	A. baumannii 1413735	USA	NA	sputum	5	2	39	2	3	1	5	499
1310777.3	2469	A. baumannii 1262761-97	USA	NA	sputum	2	2	2	2	2	2	2	2
1310778.3	2053	A. baumannii 426863	USA	NA	sputum	40	1	6	2	7	1	2	507
1310780.3	2466	A. baumannii 1117819	USA	NA	sputum	2	2	2	2	2	2	2	2
1310781.3	2333	A. baumannii 277047	USA	NA	sputum	40	1	6	2	102	1	2	652
1310782.3	2986	A. baumannii 1170863	USA	NA	sputum	5	2	39	2	3	1	5	499
1310783.3	2984	A. baumannii 214216	USA	NA	sputum	5	2	39	2	3	1	5	499
1310784.3	2292	A. baumannii 1007214	USA	NA	sputum	1	3	2	1	4	4	4	10
1310785.3	2462	A. baumannii 466215	USA	NA	sputum	2	2	2	2	2	2	2	2
1310786.3	2078	A. baumannii 541915	USA	NA	sputum	3	2	2	53	11	1	5	532
1310787.3	2910	A. baumannii 70136	USA	NA	sputum	2	2	2	2	2	2	2	2
1310789.3	2908	A. baumannii 145660	USA	NA	sputum	2	2	2	2	2	2	2	2
1310790.3	2077	A. baumannii 1179249	USA	NA	sputum	22	26	91	14	23	19	47	531
1310791.3	3848	A. baumannii 742879	USA	NA	sputum	170	20	46	81	72	18	116	1167
1310792.3	2463	A. baumannii 981176	USA	NA	sputum	2	2	2	2	2	2	2	2
1310793.3	2464	A. baumannii 98826	USA	NA	sputum	2	2	2	2	2	2	2	2
1310794.3	2465	A. baumannii 303002	USA	NA	sputum	2	2	2	2	2	2	2	2
1310795.3	2048	A. baumannii 1281984	USA	NA	sputum	20	26	26	14	23	16	23	502
1310796.3	2471	A. baumannii 1406182	USA	NA	sputum	2	2	2	2	2	2	2	2
1310797.3	2912	A. baumannii 1428368	USA	NA	sputum	2	2	2	2	2	2	2	2
1310798.3	2985	A. baumannii 14216	USA	NA	sputum	5	2	39	2	3	1	5	499
1310799.3	2456	A. baumannii 1494580	USA	NA	sputum	2	2	2	2	2	2	2	2
1310801.3	2909	A. baumannii 339786	USA	NA	sputum	2	2	2	2	2	2	2	2
1310802.3	2913	A. baumannii 11126	USA	NA	sputum	2	2	2	2	2	2	2	2
1310803.3	2911	A. baumannii 730795	USA	NA	sputum	2	2	2	2	2	2	2	2
1310805.3	2427	A. baumannii 1426993	USA	NA	sputum	2	2	2	2	2	2	2	2
1310806.3	2619	A. baumannii 1505311	USA	NA	sputum	2	2	8	2	2	2	2	663
1310807.3	2903	A. baumannii 1488685	USA	NA	sputum	2	2	2	2	2	2	2	2
1310808.3	2426	A. baumannii 470922	USA	NA	sputum	2	2	2	2	2	2	2	2
1310809.3	2928	A. baumannii 1539026	USA	NA	sputum	2	2	2	2	2	2	2	2
1310810.3	2429	A. baumannii 7893	USA	NA	sputum	2	2	2	2	2	2	2	2
1310811.3	2425	A. baumannii 458282	USA	NA	sputum	2	2	2	2	2	2	2	2
1310812.3	2902	A. baumannii 1552389	USA	NA	sputum	2	2	2	2	2	2	2	2
1310813.3	2979	A. baumannii 722310	USA	NA	sputum	5	2	39	2	3	1	5	499
1310815.3	2640	A. baumannii 756476	USA	NA	sputum	2	2	2	2	2	4	2	664
1310820.3	2901	A. baumannii 323408	USA	NA	sputum	2	2	2	2	2	2	2	2
1310825.3	2611	A. baumannii 1064293_46	USA	NA	sputum	2	2	2	2	2	2	2	2
1310826.3	2988	A. baumannii 1195185_80	USA	NA	sputum	5	2	39	2	3	1	5	499
1310827.3	2293	A. baumannii 1262761-105	USA	NA		1	3	2	1	4	4	4	10
1310828.3	2741	A. baumannii 472237-120	USA	NA	sputum	3	3	2	2	28	1	5	500
1310829.3	2932	A. baumannii 1276470-132	USA	NA		2	2	2	2	2	2	2	2
1310830.3	2641	A. baumannii 929679-598	USA	NA		2	2	2	2	68	2	2	415
1310831.3	2636	A. baumannii 1042969-1197	USA	NA		2	2	2	2	2	2	2	2
1310835.3	2598	A. baumannii 24860_1	USA	NA		2	2	2	2	2	2	2	2
1310836.3	2434	A. baumannii 24860_2	USA	NA		2	2	2	2	2	2	2	2
1310837.3	2638	A. baumannii 24860_3	USA	NA		2	2	2	2	2	2	2	2
1310838.5	2435	A. baumannii 24860_4	USA	NA		2	2	2	2	2	2	2	2
1310839.3	2639	A. baumannii 24860_5	USA	NA		2	2	2	2	2	2	2	2
1310840.3	2599	A. baumannii 24860_6	USA	NA		2	2	2	2	2	2	2	2
1310841.3	2436	A. baumannii 24860_7	USA	NA		2	2	2	2	2	2	2	2
1310842.3	2428	A. baumannii 24860_8	USA	NA		2	2	2	2	2	2	2	2
1310843.3	2621	A. baumannii 24860_9	USA	NA		2	2	2	2	2	2	2	2
1310844.3	2433	A. baumannii 24860_10	USA	NA		2	2	2	2	2	2	2	2
1310846.3	2633	A. baumannii 24812_2	USA	NA		2	2	2	2	2	2	2	2
1310848.3	2071	A. baumannii 24812_4	USA	NA		2	2	2	2	2	50	2	525
1310850.3	2432	A. baumannii 24812_6	USA	NA		2	2	2	2	2	2	2	2
1310851.3	2642	A. baumannii 24812_7	USA	NA		2	2	2	2	2	2	2	2
1310852.3	2637	A. baumannii 24812_8	USA	NA		2	2	100	2	2	2	2	668
1310854.3	2072	A. baumannii 24812_10	USA	NA		2	2	2	2	100	2	2	526
1310855.3	2495	A. baumannii 24845_1	USA	NA		2	2	2	2	2	2	2	2
1310857.3	2479	A. baumannii 24845_3	USA	NA		2	2	2	2	2	2	2	2
1310858.3	2480	A. baumannii 24845_4	USA	NA		2	2	2	2	2	2	2	2
1310859.3	2478	A. baumannii 24845_5	USA	NA		2	2	2	2	2	2	2	2
1310860.3	2494	A. baumannii 24845_6	USA	NA		2	2	2	2	2	2	2	2
1310861.3	2484	A. baumannii 24845_7	USA	NA		2	2	2	2	2	2	2	2
1310862.3	2476	A. baumannii 24845_8	USA	NA		2	2	2	2	2	2	2	2
1310863.3	2481	A. baumannii 24845_9	USA	NA		2	2	2	2	2	2	2	2
1310864.3	2477	A. baumannii 24845_10	USA	NA		2	2	2	2	2	2	2	2
1310865.3	2489	A. baumannii 25307_1	USA	NA		2	2	2	2	2	2	2	2
1310866.3	2490	A. baumannii 25307_2	USA	NA		2	2	2	2	2	2	2	2
1310867.3	2491	A. baumannii 25307_3	USA	NA		2	2	2	2	2	2	2	2
1310868.3	2492	A. baumannii 25307_4	USA	NA		2	2	2	2	2	2	2	2
1310869.3	2493	A. baumannii 25307_5	USA	NA		2	2	2	2	2	2	2	2
1310870.3	2482	A. baumannii 25307_6	USA	NA		2	2	2	2	2	2	2	2
1310872.3	2483	A. baumannii 25307_8	USA	NA		2	2	2	2	2	2	2	2
1310875.3	2496	A. baumannii 25253_1	USA	NA		2	2	2	2	2	2	2	2
1310877.3	2498	A. baumannii 25253_3	USA	NA		2	2	2	2	2	2	2	2
1310878.3	2499	A. baumannii 25253_4	USA	NA		2	2	2	2	2	2	2	2
1310879.3	2500	A. baumannii 25253_5	USA	NA		2	2	2	2	2	2	2	2
1310880.3	2501	A. baumannii 25253_6	USA	NA		2	2	2	2	2	2	2	2
1310881.3	2502	A. baumannii 25253_7	USA	NA		2	106	2	2	2	2	2	661
1310882.3	2488	A. baumannii 25253_8	USA	NA		2	2	2	2	2	2	2	2
1310884.3	2497	A. baumannii 25253_10	USA	NA		2	2	2	2	2	2	2	2
1310885.3	2486	A. baumannii 44895_1	USA	NA		2	2	2	2	2	2	2	2
1310886.3	2487	A. baumannii 44895_2	USA	NA		2	2	2	2	2	2	2	2
1310887.3	2505	A. baumannii 44895_3	USA	NA		2	2	2	2	2	2	2	2
1310888.3	2475	A. baumannii 44895_4	USA	NA		2	2	2	2	2	2	2	2
1310889.3	2503	A. baumannii 44895_5	USA	NA		2	2	2	2	2	2	2	2
1310890.3	2504	A. baumannii 44895_6	USA	NA		2	2	2	2	2	2	2	2
1310892.3	2474	A. baumannii 44895_8	USA	NA		2	2	2	2	2	2	2	2
1310893.3	2473	A. baumannii 44895_9	USA	NA		2	2	2	2	2	2	2	2
1310894.3	2485	A. baumannii 44895_10	USA	NA		2	2	2	2	2	2	2	2
1310897.3	2919	A. baumannii 45002_3	USA	NA		2	2	2	2	2	2	2	2
1310898.3	2920	A. baumannii 45002_4	USA	NA		2	2	2	2	2	2	2	2
1310899.3	2917	A. baumannii 45002_5	USA	NA		2	2	2	2	2	2	2	2
1310900.3	2914	A. baumannii 45002_6	USA	NA		2	2	2	2	2	2	2	2
1310901.3	2915	A. baumannii 45002_7	USA	NA		2	2	2	2	2	2	2	2
1310902.3	2916	A. baumannii 45002_8	USA	NA		2	2	2	2	2	2	2	2
1310903.3	2930	A. baumannii 45002_9	USA	NA		2	2	2	2	2	2	2	2
1310904.3	2918	A. baumannii 45002_10	USA	NA		2	2	2	2	2	2	2	2
1310905.3	2047	A. baumannii 25977_1	USA	NA		22	26	47	14	50	16	25	501
1310915.3	2531	A. baumannii 25766_1	USA	NA		2	2	2	2	2	2	2	2
1310916.3	2527	A. baumannii 25766_2	USA	NA		2	2	2	2	2	2	2	2
1310917.3	2528	A. baumannii 25766_3	USA	NA		2	2	2	2	2	2	2	2
1310918.3	2548	A. baumannii 25766_4	USA	NA		2	2	2	2	2	2	2	2
1310919.3	2545	A. baumannii 25766_5	USA	NA		2	2	2	2	2	2	2	2
1310920.3	2539	A. baumannii 25766_6	USA	NA		2	2	2	2	2	2	2	2
1310921.3	2543	A. baumannii 25766_7	USA	NA		2	2	2	2	2	2	2	2
1310923.3	2546	A. baumannii 25766_9	USA	NA		2	2	2	2	2	2	2	2
1310924.3	2547	A. baumannii 25766_10	USA	NA		2	2	2	2	2	2	2	2
1310925.3	2544	A. baumannii 25691_1	USA	NA		2	2	2	2	2	2	2	2
1310926.3	2540	A. baumannii 25691_2	USA	NA		2	2	2	2	2	2	2	2
1310929.3	2620	A. baumannii 25691_5	USA	NA		2	2	2	2	2	2	2	2
1310930.3	2541	A. baumannii 25691_6	USA	NA		2	2	2	2	2	2	2	2
1310931.3	2632	A. baumannii 25691_7	USA	NA		2	2	2	2	2	2	2	2
1310932.3	2627	A. baumannii 25691_8	USA	NA		2	2	2	2	2	2	2	2
1310933.3	2542	A. baumannii 25691_9	USA	NA		2	2	2	2	2	2	2	2
1310934.3	2526	A. baumannii 25691_10	USA	NA		2	2	2	2	2	2	2	2
1310935.4	2532	A. baumannii 25935_1	USA	NA		2	2	2	2	2	2	2	2
1310936.3	2533	A. baumannii 25935_2	USA	NA		2	2	2	2	2	2	2	2
1310938.3	2534	A. baumannii 25935_4	USA	NA		2	2	2	2	2	2	2	2
1310939.3	2535	A. baumannii 25935_5	USA	NA		2	2	2	2	2	2	2	2
1310940.3	2536	A. baumannii 25935_6	USA	NA		2	2	2	2	2	2	2	2
1310941.3	2537	A. baumannii 25935_7	USA	NA		2	2	2	2	2	2	2	2
1310942.3	2538	A. baumannii 25935_8	USA	NA		2	2	2	2	2	2	2	2
1310943.3	2529	A. baumannii 25935_9	USA	NA		2	2	2	2	2	2	2	2
1310944.3	2512	A. baumannii 25935_10	USA	NA		2	2	2	2	2	2	2	2
1310945.3	2530	A. baumannii 24975_1	USA	NA		2	2	2	2	2	2	2	2
1310948.3	2506	A. baumannii 24975_4	USA	NA		2	2	2	2	2	2	2	2
1310949.3	2517	A. baumannii 24975_5	USA	NA		2	2	2	2	2	2	2	2
1310951.3	2510	A. baumannii 24975_7	USA	NA		2	2	2	2	2	2	2	2
1310953.3	2511	A. baumannii 24975_9	USA	NA		2	2	2	2	2	2	2	2
1310954.3	2595	A. baumannii 24975_10	USA	NA		2	2	2	2	2	2	2	2
1310955.3	2509	A. baumannii 25561_1	USA	NA		2	2	2	2	2	2	2	2
1310956.3	2507	A. baumannii 25561_2	USA	NA		2	2	2	2	2	2	2	2
1310961.3	2508	A. baumannii 25561_7	USA	NA		2	2	2	2	2	2	2	2
1310964.3	2565	A. baumannii 25561_10	USA	NA		2	2	2	2	2	2	2	2
1310965.3	2628	A. baumannii 25750_1	USA	NA		2	2	2	2	2	2	2	2
1310970.3	2559	A. baumannii 25750_6	USA	NA		2	2	2	2	2	2	2	2
1310971.3	2515	A. baumannii 25750_7	USA	NA		2	2	2	2	2	2	2	2
1310972.3	2516	A. baumannii 25750_8	USA	NA		2	2	2	2	2	2	2	2
1310975.3	2561	A. baumannii 44467_1	USA	NA		2	2	2	2	2	2	2	2
1310976.3	2562	A. baumannii 44467_2	USA	NA		2	2	2	2	2	2	2	2
1310977.3	2563	A. baumannii 44467_3	USA	NA		2	2	2	2	2	2	2	2
1310978.3	2564	A. baumannii 44467_4	USA	NA		2	2	2	2	2	2	2	2
1310979.3	2549	A. baumannii 44467_5	USA	NA		2	2	2	2	2	2	2	2
1310980.3	2550	A. baumannii 44467_6	USA	NA		2	2	2	2	2	2	2	2
1310981.3	2551	A. baumannii 44467_7	USA	NA		2	2	2	2	2	2	2	2
1310982.3	2552	A. baumannii 44467_8	USA	NA		2	2	2	2	2	2	2	2
1310983.3	2525	A. baumannii 44467_9	USA	NA		2	2	2	2	2	2	2	2
1310984.3	2560	A. baumannii 44467_10	USA	NA		2	2	2	58	2	2	2	662
1310985.3	2519	A. baumannii 44327_1	USA	NA		2	2	2	2	2	2	2	2
1310986.3	2514	A. baumannii 44327_2	USA	NA		2	2	2	2	2	2	2	2
1310988.3	2520	A. baumannii 44327_4	USA	NA		2	2	2	2	2	2	2	2
1310989.3	2521	A. baumannii 44327_5	USA	NA		2	2	2	2	2	2	2	2
1310990.3	2524	A. baumannii 44327_6	USA	NA		2	2	2	2	2	2	2	2
1310991.3	2518	A. baumannii 44327_7	USA	NA		2	2	2	2	2	2	2	2
1310992.3	2513	A. baumannii 44327_8	USA	NA		2	2	2	2	2	2	2	2
1311003.3	2523	A. baumannii 44857_9	USA	NA		2	2	2	2	2	2	2	2
1311004.3	2522	A. baumannii 44857_10	USA	NA		2	2	2	2	2	2	2	2
1311006.3	2553	A. baumannii 25681_2	USA	NA		2	2	2	2	2	2	2	2
1311007.3	2554	A. baumannii 25681_3	USA	NA		2	2	2	2	2	2	2	2
1311009.3	2555	A. baumannii 25681_5	USA	NA		2	2	2	2	2	2	2	2
1311010.3	2556	A. baumannii 25681_6	USA	NA		2	2	2	2	2	2	2	2
1311012.3	2557	A. baumannii 25681_8	USA	NA		2	2	2	2	2	2	2	2
1311013.3	2558	A. baumannii 25681_9	USA	NA		2	2	2	2	2	2	2	2
1311015.3	2337	A. baumannii 25493_1	USA	NA		1	2	2	2	11	1	5	417
1311016.3	2335	A. baumannii 25493_2	USA	NA		1	2	2	2	11	1	5	417
1311017.3	2338	A. baumannii 25493_3	USA	NA		1	2	2	2	4	1	4	416
1311018.3	2339	A. baumannii 25493_4	USA	NA		102	2	98	2	11	1	5	657
1311019.3	2340	A. baumannii 25493_5	USA	NA		1	105	2	2	11	1	5	658
1311020.3	2341	A. baumannii 25493_6	USA	NA		1	2	2	2	112	1	4	659
1311022.3	2342	A. baumannii 25493_8	USA	NA		1	2	2	2	4	1	4	416
1311023.3	2343	A. baumannii 25493_9	USA	NA		1	2	2	2	11	1	5	417
1311024.3	2336	A. baumannii 25493_10	USA	NA		1	2	2	2	11	1	99	656
1311027.3	2578	A. baumannii 44437_3	USA	NA		2	2	2	2	2	2	2	2
1311028.3	2579	A. baumannii 44437_4	USA	NA		2	2	2	2	2	2	2	2
1311029.3	2580	A. baumannii 44437_5	USA	NA		2	2	2	2	2	2	2	2
1311031.3	2581	A. baumannii 44437_7	USA	NA		2	2	2	2	2	2	2	2
1311032.3	2582	A. baumannii 44437_8	USA	NA		2	2	2	2	2	2	2	2
1311033.3	2583	A. baumannii 44437_9	USA	NA		2	2	2	2	2	2	2	2
1311035.3	2585	A. baumannii 44362_1	USA	NA		2	2	2	2	2	2	2	2
1311036.3	2569	A. baumannii 44362_2	USA	NA		2	2	2	2	2	2	2	2
1311037.3	2571	A. baumannii 44362_3	USA	NA		2	2	2	2	2	2	2	2
1311038.3	2572	A. baumannii 44362_4	USA	NA		2	2	2	2	2	2	2	2
1311039.3	2573	A. baumannii 44362_5	USA	NA		2	2	2	2	2	2	2	2
1311040.3	2574	A. baumannii 44362_6	USA	NA		2	2	2	2	2	2	2	2
1311041.3	2575	A. baumannii 44362_7	USA	NA		2	2	2	2	2	2	2	2
1311042.3	2576	A. baumannii 44362_8	USA	NA		2	2	2	2	2	2	2	2
1311043.3	2577	A. baumannii 44362_9	USA	NA		2	2	2	2	2	2	2	2
1311044.3	2584	A. baumannii 44362_10	USA	NA		2	2	2	2	2	2	2	2
1311045.3	2568	A. baumannii 25878_1	USA	NA		2	2	2	2	2	2	2	2
1311046.3	2567	A. baumannii 25878_2	USA	NA		2	2	2	2	2	2	2	2
1311047.3	2570	A. baumannii 25878_3	USA	NA		2	2	2	2	2	2	2	2
1311048.3	2566	A. baumannii 43557_1	USA	NA		2	2	2	2	2	2	2	2
1311065.3	2613	A. baumannii 44839_8	USA	NA		2	2	2	2	2	2	2	2
1311066.3	2616	A. baumannii 44839_9	USA	NA		2	2	2	2	2	2	2	2
1311067.3	2596	A. baumannii 44839_10	USA	NA		2	2	2	2	2	2	2	2
1311068.3	2587	A. baumannii 26016_1	USA	NA		2	2	2	2	2	2	2	2
1311069.3	2629	A. baumannii 26016_2	USA	NA		2	2	2	2	2	2	2	2
1311070.3	2630	A. baumannii 26016_3	USA	NA		2	2	2	2	2	2	2	2
1311071.3	2586	A. baumannii 26016_4	USA	NA		2	2	2	2	2	2	2	2
1311072.3	2591	A. baumannii 26016_5	USA	NA		2	2	2	2	2	2	2	2
1311073.3	2588	A. baumannii 26016_6	USA	NA		2	2	2	2	2	2	2	2
1311074.3	2631	A. baumannii 26016_7	USA	NA		2	2	2	2	2	2	2	2
1311075.3	2593	A. baumannii 26016_8	USA	NA		2	2	2	2	2	2	2	2
1311076.3	2597	A. baumannii 26016_9	USA	NA		2	2	2	2	2	2	2	2
1311077.3	2589	A. baumannii 26016_10	USA	NA		2	2	2	2	2	2	2	2
1311078.3	2600	A. baumannii 44298_1	USA	NA		2	2	2	2	2	2	2	2
1311079.3	2601	A. baumannii 44298_2	USA	NA		2	2	2	2	2	2	2	2
1311080.3	2612	A. baumannii 44298_3	USA	NA		2	2	2	2	2	2	2	2
1311081.3	2602	A. baumannii 44298_4	USA	NA		2	2	2	2	2	2	2	2
1311082.3	2614	A. baumannii 44298_5	USA	NA		2	2	2	2	2	2	2	2
1311083.3	2603	A. baumannii 44298_6	USA	NA		2	2	2	2	2	2	2	2
1311084.3	2604	A. baumannii 44298_7	USA	NA		2	2	2	2	2	2	2	2
1311085.3	2615	A. baumannii 44298_8	USA	NA		2	2	2	2	2	2	2	2
1311086.3	2605	A. baumannii 44298_9	USA	NA		2	2	2	2	2	2	2	2
1311087.3	2606	A. baumannii 44298_10	USA	NA		2	2	2	2	2	2	2	2
1311088.3	2359	A. baumannii 45075_1	USA	NA		1	2	2	2	4	1	5	514
1311089.3	2360	A. baumannii 45075_2	USA	NA		1	2	2	2	4	1	5	514
1311090.3	2361	A. baumannii 45075_3	USA	NA		1	2	2	2	4	1	5	514
1311091.3	2750	A. baumannii 45075_4	USA	NA		3	3	2	2	28	1	5	500
1311092.3	2358	A. baumannii 45075_5	USA	NA		1	2	2	2	4	1	5	514
1311093.3	2357	A. baumannii 45075_6	USA	NA		1	2	2	2	4	1	5	514
1311095.3	2363	A. baumannii 45075_8	USA	NA		1	2	2	2	4	1	5	514
1311096.3	2364	A. baumannii 45075_9	USA	NA		1	2	2	2	4	1	5	514
1311097.3	2366	A. baumannii 45075_10	USA	NA		1	2	2	2	4	1	5	514
1311098.3	2594	A. baumannii 16553_1	USA	NA		2	2	2	2	2	2	2	2
1311099.3	2922	A. baumannii 16553_2	USA	NA		2	2	2	2	68	2	2	415
1311100.3	2924	A. baumannii 16553_3	USA	NA		2	2	2	2	68	2	2	415
1311101.3	2923	A. baumannii 16553_4	USA	NA		2	2	2	2	68	2	2	415
1311103.3	2921	A. baumannii 16553_6	USA	NA		2	2	2	2	68	2	2	415
1311105.3	2927	A. baumannii 16553_8	USA	NA		2	2	2	2	68	2	2	415
1311106.3	2926	A. baumannii 16553_9	USA	NA		2	2	2	2	68	2	2	415
1311107.3	2925	A. baumannii 16553_10	USA	NA		2	2	2	2	68	2	2	415
1311108.3	2344	A. baumannii 25569_1	USA	NA		1	2	2	2	4	1	4	416
1311109.3	2345	A. baumannii 25569_2	USA	NA		1	2	2	2	11	1	5	417
1311110.3	2349	A. baumannii 25569_3	USA	NA		1	2	2	2	4	1	4	416
1311111.3	2346	A. baumannii 25569_4	USA	NA		1	2	2	2	11	1	5	417
1311112.3	2351	A. baumannii 25569_5	USA	NA		1	2	2	2	11	1	5	417
1311113.3	2590	A. baumannii 25569_6	USA	NA		2	2	2	2	2	2	2	2
1311114.3	2350	A. baumannii 25569_7	USA	NA		1	2	99	2	11	1	5	660
1311115.3	2354	A. baumannii 25569_8	USA	NA		1	2	2	2	4	1	4	416
1311116.3	2355	A. baumannii 25569_9	USA	NA		1	2	2	2	4	1	4	416
1311117.3	2362	A. baumannii 25569_10	USA	NA		1	2	2	2	11	1	5	417
1311118.3	2617	A. baumannii 25442_1	USA	NA		2	2	2	2	2	2	2	2
1311122.3	2607	A. baumannii 25442_5	USA	NA		2	107	2	2	2	2	2	672
1311124.3	2608	A. baumannii 25442_7	USA	NA		103	2	103	2	2	2	2	673
1311126.3	2609	A. baumannii 25442_9	USA	NA		2	2	2	2	114	2	2	674
1311128.3	2929	A. baumannii 45057_1	USA	NA		2	2	2	2	2	2	2	2
1311131.3	2592	A. baumannii 45057_4	USA	NA		2	2	2	2	2	2	2	2
1311134.3	2610	A. baumannii 42057_2	USA	NA		2	2	2	2	2	2	2	2
1311135.3	2751	A. baumannii 42057_3	USA	NA		3	3	2	2	28	1	5	500
1311136.3	2749	A. baumannii 42057_4	USA	NA		3	3	2	2	28	1	5	500
1311137.3	2752	A. baumannii 42057_5	USA	NA		3	3	2	2	28	1	5	500
1311138.3	2748	A. baumannii 42057_6	USA	NA		3	3	2	2	28	1	5	500
1311141.3	2352	A. baumannii 45052_1	USA	NA		1	2	2	2	4	1	5	514
1311142.3	2365	A. baumannii 45052_2	USA	NA		1	2	2	2	4	1	5	514
1311143.3	2347	A. baumannii 45052_3	USA	NA		1	2	2	2	4	1	5	514
1311144.3	2356	A. baumannii 45052_4	USA	NA		1	2	2	2	4	1	5	514
1311145.3	2348	A. baumannii 45052_5	USA	NA		1	2	2	2	4	1	5	514
1315134.3	1948	A. baumannii TG00314	USA	2013	other	64	52	7	2	29	4	29	411
1315135.3	2960	A. baumannii TG02011	USA	NA	sputum	26	72	2	2	29	4	5	422
1315136.3	1970	A. baumannii TG02017	USA	2013	sputum	3	1	7	1	7	1	4	424
1315137.3	1940	A. baumannii TG07725	USA	2013	other	1	1	1	2	65	1	5	406
1315138.3	2837	A. baumannii TG15233	USA	NA	upper respiratory tract	2	2	2	2	2	2	2	2
1315139.3	2385	A. baumannii TG15234	USA	NA		2	2	2	2	2	2	2	2
1315140.3	2838	A. baumannii TG15236	USA	NA	blood	2	2	2	2	2	2	2	2
1315141.3	2839	A. baumannii TG15237	USA	NA	upper respiratory tract	2	2	2	2	2	2	2	2
1315142.3	2836	A. baumannii TG15238	USA	NA	sputum	2	2	2	2	2	2	2	2
1315143.3	2835	A. baumannii TG15239	USA	NA	sputum	2	2	2	2	2	2	2	2
1315144.3	2386	A. baumannii TG15240	USA	NA	sputum	2	2	2	2	2	2	2	2
1315145.3	2387	A. baumannii TG15241	USA	NA	sputum	2	2	2	2	2	2	2	2
1315146.3	2388	A. baumannii TG15242	USA	NA		2	2	2	2	2	2	2	2
1315147.3	2840	A. baumannii TG2012	USA	NA	blood	2	2	2	2	2	2	2	2
1315148.3	2841	A. baumannii TG2013	USA	NA	upper respiratory tract	2	2	2	2	2	2	2	2
1315149.3	2842	A. baumannii TG2014	USA	NA	upper respiratory tract	2	2	2	2	2	2	2	2
1315150.3	2278	A. baumannii TG20277	USA	NA	sputum	1	1	1	1	5	1	1	1
1315151.3	2389	A. baumannii TG20546	USA	NA	sputum	2	2	2	2	2	2	2	2
1315154.3	2843	A. baumannii TG22110	USA	NA	upper respiratory tract	2	2	2	2	2	2	2	2
1315155.3	2279	A. baumannii TG22112	USA	NA	upper respiratory tract	1	1	1	1	5	1	1	1
1315156.3	2724	A. baumannii TG22142	USA	NA	upper respiratory tract	25	3	6	2	28	1	29	78
1315157.3	2725	A. baumannii TG22146	USA	NA	wound	25	3	6	2	28	1	29	78
1315158.3	2280	A. baumannii TG22148	USA	NA	upper respiratory tract	1	1	1	1	5	1	1	1
1315159.3	2723	A. baumannii TG22150	USA	NA	upper respiratory tract	25	3	6	2	28	1	29	78
1315160.3	2274	A. baumannii TG22190	USA	NA	upper respiratory tract	1	1	1	1	5	1	1	1
1315161.3	2824	A. baumannii TG22192	USA	NA	upper respiratory tract	2	2	2	2	2	2	2	2
1315162.3	2275	A. baumannii TG22194	USA	NA	upper respiratory tract	1	1	1	1	5	1	1	1
1315163.3	2276	A. baumannii TG22196	USA	NA	blood	1	1	1	1	5	1	1	1
1315165.3	2825	A. baumannii TG22202	USA	NA	blood	2	2	2	2	2	2	2	2
1315166.3	1971	A. baumannii TG22204	USA	2013	lower respiratory tract	3	3	63	6	4	9	1	425
1315167.3	2826	A. baumannii TG22212	USA	NA	upper respiratory tract	2	2	2	2	2	2	2	2
1315168.3	2277	A. baumannii TG22214	USA	NA	sputum	1	1	1	1	5	1	1	1
1315169.3	1941	A. baumannii TG22332	USA	2013	upper respiratory tract	1	1	1	2	65	1	5	406
1315170.3	1942	A. baumannii TG22336	USA	2013	upper respiratory tract	1	1	1	2	65	1	5	406
1315171.3	1943	A. baumannii TG27295	USA	2013		1	1	1	2	65	1	5	406
1315172.3	2827	A. baumannii TG27299	USA	NA	blood	2	2	2	2	2	2	2	2
1315173.3	2383	A. baumannii TG27307		NA		2	2	2	2	2	2	2	2
1315174.3	2384	A. baumannii TG27311		NA		2	2	2	2	2	2	2	2
1315175.3	2828	A. baumannii TG27315	USA	NA		2	2	2	2	2	2	2	2
1315176.3	2829	A. baumannii TG27319	USA	NA		2	2	2	2	2	2	2	2
1315177.3	2830	A. baumannii TG27371	USA	NA		2	2	2	2	2	2	2	2
1315178.3	2831	A. baumannii TG27379	USA	NA	wound	2	2	2	2	2	2	2	2
1315179.3	2832	A. baumannii TG27383	USA	NA	sputum	2	2	2	2	2	2	2	2
1315180.3	2687	A. baumannii TG27387	USA	NA		5	4	4	1	3	3	4	6
1315181.3	1973	A. baumannii TG27391	USA	2013		13	3	2	3	6	1	16	427
1315182.3	1961	A. baumannii TG27395	USA	2013	sputum	1	2	2	2	11	1	5	417
1315183.3	1962	A. baumannii TG27399	USA	2013	sputum	1	2	2	2	11	1	5	417
1315184.3	2833	A. baumannii TG27407	USA	NA	sputum	2	2	2	2	2	2	2	2
1315185.3	2834	A. baumannii TG27411	USA	NA		2	2	2	2	2	2	2	2
1340174.3	2846	A. baumannii MRY09-0642	Japan	2008		2	2	2	2	2	2	2	2
1340175.3	2847	A. baumannii MRY10-0558	Japan	2010		2	2	2	2	2	2	2	2
1340176.3	2848	A. baumannii MRY12-0277	Japan	2012		2	2	2	2	2	2	2	2
1343072.3	2651	A. baumannii CI86	Iraq	2005	wound	3	3	2	4	7	2	4	25
1343074.3	2652	A. baumannii CI79	Iraq	2005	upper respiratory tract	3	3	2	4	7	2	4	25
1343075.3	2887	A. baumannii CI77	Iraq	2005	wound	2	2	2	2	2	2	2	2
1349824.3	2844	A. baumannii Perm	Russia	NA	blood	2	2	2	2	2	2	2	2
1351817.3	2273	A. baumannii 1605	USA	NA		1	1	1	1	5	1	1	1
1358412.3	2970	A. baumannii EGD-HP18	India	2012	environment	3	1	2	1	18	1	48	221
1370126.3	2845	A. baumannii DU202	South Korea	NA		2	2	2	2	2	2	2	2
1398943.3	2849	A. baumannii UH0207	USA	NA		2	2	2	2	2	2	2	2
1398944.3	2853	A. baumannii UH0707	USA	NA		2	2	2	2	2	2	2	2
1398945.3	2850	A. baumannii UH0807	USA	NA		2	2	2	2	2	2	2	2
1398946.3	2851	A. baumannii UH1007	USA	NA		2	2	2	2	2	2	2	2
1398947.3	2852	A. baumannii UH10007	USA	NA		2	2	2	2	2	2	2	2
1398948.3	2854	A. baumannii UH10107	USA	NA		2	2	2	2	2	2	2	2
1398949.3	2855	A. baumannii UH10707	USA	NA		2	2	2	2	2	2	2	2
1398949.4	2855	A. baumannii UH10707	USA	NA		2	2	2	2	2	2	2	2
1398950.3	2856	A. baumannii UH11608	USA	NA		2	2	2	2	2	2	2	2
1398951.3	2961	A. baumannii UH12208	USA	NA	upper respiratory tract	26	2	2	2	29	4	5	79
1398952.3	2857	A. baumannii UH12308	USA	NA		2	2	2	2	2	2	2	2
1398953.3	2858	A. baumannii UH12408	USA	NA		2	2	2	2	2	2	2	2
1398954.3	2859	A. baumannii UH12808	USA	NA		2	2	2	2	2	2	2	2
1398955.3	2860	A. baumannii UH13908	USA	NA		2	2	2	2	2	2	2	2
1398956.3	2861	A. baumannii UH14508	USA	NA		2	2	2	2	2	2	2	2
1398957.3	2862	A. baumannii UH15208	USA	NA		2	2	2	2	2	2	2	2
1398958.3	2863	A. baumannii UH16008	USA	NA		2	2	2	2	2	2	2	2
1398959.3	2864	A. baumannii UH16108	USA	NA		2	2	2	2	2	2	2	2
1398960.3	2962	A. baumannii UH16208	USA	2008	sputum	26	72	2	2	29	4	5	422
1398961.3	2865	A. baumannii UH18608	USA	NA		2	2	2	2	2	2	2	2
1398962.3	2963	A. baumannii UH19608	USA	2008	urine	26	72	2	2	29	4	5	422
1398963.3	2866	A. baumannii UH19908	USA	NA		2	2	2	2	2	2	2	2
1398964.3	2867	A. baumannii UH20108	USA	NA		2	2	2	2	2	2	2	2
1398965.4	2888	A. baumannii UH2107	USA	NA		2	2	2	2	2	2	2	2
1398966.3	2964	A. baumannii UH22908	USA	2008	wound	26	72	2	2	29	4	5	422
1398967.3	2869	A. baumannii UH2307	USA	NA		2	2	2	2	2	2	2	2
1398968.3	2878	A. baumannii UH2707	USA	NA		2	2	2	2	2	2	2	2
1398969.3	2877	A. baumannii UH2907	USA	NA		2	2	2	2	2	2	2	2
1398970.3	2889	A. baumannii UH3807	USA	NA		2	2	2	2	2	2	2	2
1398971.3	2057	A. baumannii UH5107	USA	2007	sputum	1	1	1	2	71	1	5	511
1398972.3	2726	A. baumannii UH5207	USA	2007	IV catheter	25	3	6	2	28	1	29	78
1398973.3	2881	A. baumannii UH5307	USA	NA		2	2	2	2	2	2	2	2
1398974.3	2882	A. baumannii UH5707	USA	NA		2	2	2	2	2	2	2	2
1398975.3	2883	A. baumannii UH6107	USA	NA		2	2	2	2	2	2	2	2
1398976.3	2884	A. baumannii UH6207	USA	NA		2	2	2	2	2	2	2	2
1398977.3	2064	A. baumannii UH6507	USA	2007	urine	5	2	2	2	2	2	5	518
1398978.3	2965	A. baumannii UH6907	USA	2007	sputum	26	72	2	2	29	4	5	422
1398979.3	2390	A. baumannii UH7007	USA	2007	urine	2	2	2	2	2	2	2	2
1398980.3	2966	A. baumannii UH7607	USA	2007	urine	26	72	2	2	29	4	5	422
1398981.3	2885	A. baumannii UH7707	USA	NA		2	2	2	2	2	2	2	2
1398982.3	2886	A. baumannii UH7807	USA	NA		2	2	2	2	2	2	2	2
1398983.3	2967	A. baumannii UH7907	USA	2007	blood	26	72	2	2	29	4	5	422
1398984.3	2870	A. baumannii UH8107	USA	NA		2	2	2	2	2	2	2	2
1398985.3	2871	A. baumannii UH8407	USA	NA		2	2	2	2	2	2	2	2
1398986.3	2872	A. baumannii UH8707	USA	NA		2	2	2	2	2	2	2	2
1398987.3	2873	A. baumannii UH8807	USA	NA		2	2	2	2	2	2	2	2
1398988.3	2070	A. baumannii UH8907	USA	2007	blood	2	97	2	2	2	2	2	524
1398989.3	2874	A. baumannii UH9007	USA	NA		2	2	2	2	2	2	2	2
1398990.4	2875	A. baumannii UH9707	USA	NA		2	2	2	2	2	2	2	2
1398991.3	2876	A. baumannii UH9907	USA	NA		2	2	2	2	2	2	2	2
1398991.4	2876	A. baumannii UH9907	USA	NA		2	2	2	2	2	2	2	2
1400867.3	697	A. baumannii ZW85-1	China	2013	stool/rectal swab	3	3	2	2	11	57	4	639
1401639.4	3063	A. baumannii NCGM 237	Japan	2012		2	2	2	2	2	2	2	2
1409922.5	2283	A. baumannii MRSN 3405	USA	NA	wound	1	2	2	1	5	1	1	94
1409926.3	2282	A. baumannii MRSN 58	USA	NA	wound	1	1	1	1	5	1	1	1
1409926.6	2282	A. baumannii MRSN 58	USA	NA	wound	1	1	1	1	5	1	1	1
1434212.3	2281	A. baumannii MRSN 57	USA	NA	wound	1	1	1	1	5	1	1	1
1435047.3	2391	A. baumannii MDR_MMC4	USA	NA	lower respiratory tract	2	2	2	2	2	2	2	2
1439316.7	2771	A. baumannii BIDMC 56	USA	2013	urine	2	2	2	2	2	2	2	2
1439317.3	2709	A. baumannii BIDMC 57	USA	2013	lower respiratory tract	20	26	90	14	26	16	47	530
1455315.3	2287	A. baumannii LAC-4	USA	1997		1	3	2	1	4	4	4	10
1455315.5	2287	A. baumannii LAC-4	USA	1997		1	3	2	1	4	4	4	10
1455316.3	2252	A. baumannii R1B	Saudi Arabia	2011		1	1	1	1	5	1	1	1
1561081.3	2169	A. baumannii JVAP01	Turkey	2009	urine	94	55	77	50	106	44	88	606
400667.7	1130	A. baumannii ATCC 17978		1951	other	3	2	2	2	3	4	28	77
405416.6	1055	A. baumannii ACICU	Italy	2005	CSF	2	2	2	2	2	2	2	2
470.1288	2756	A. baumannii AC29	Malaysia	2011	lower respiratory tract	2	2	2	2	2	2	2	2
470.1289	2993	A. baumannii BU310	USA	NA		5	2	39	2	3	1	5	499
470.1290	2992	A. baumannii BR097	USA	NA	sputum	5	2	39	2	3	1	5	499
470.1291	2185	A. baumannii BM4587	France	2009		1	63	2	2	9	4	3	621
470.1292	2940	A. baumannii TCM206	China	2012	sputum	2	2	2	2	2	2	2	2
470.1293	2045	A. baumannii ABBL099	USA	2010	blood	5	2	39	2	3	1	5	499
470.1296	2679	A. baumannii GTC 03322	Japan	NA	urine	1	2	2	2	5	1	14	40
470.1297	2680	A. baumannii GTC 03323	Japan	NA	upper respiratory tract	1	2	2	2	5	1	14	40
470.1299	2681	A. baumannii GTC 03328	Japan	NA	upper respiratory tract	1	2	2	2	5	1	14	40
470.1300	2370	A. baumannii GTC 03329	Japan	NA		3	2	2	7	9	1	5	52
470.1310	3065	A. baumannii CSO1		NA		2	2	2	2	2	2	2	2
470.1311	3066	A. baumannii CR17		NA		2	2	2	2	2	2	2	2
470.1314	3308	A. baumannii A155	Australia	2007	blood	1	3	2	1	4	4	4	10
470.1345	3068	A. baumannii AB5075-UW	USA	2008		1	1	1	1	5	1	1	1
470.1349	735	A. baumannii J133	Japan	2010		2	2	2	2	2	2	2	2
470.1351	2369	A. baumannii GTC 03324	Japan	NA		3	2	2	7	9	1	5	52
470.1357	743	A. baumannii S46	Singapore	2010		2	2	2	2	2	2	2	2
470.1358	740	A. baumannii S11	Singapore	2010		3	1	5	3	29	2	3	654
470.1375	3071	A. baumannii XH386	China	2014	lower respiratory tract	2	2	2	2	2	2	2	2
470.1384	3729	A. baumannii 219_ABAU	USA	NA		3	2	2	1	29	4	4	1140
470.1421	2044	A. baumannii ABBL059	USA	2008	blood	27	3	2	3	6	1	16	498
470.1521	2042	A. baumannii ABBL001	USA	2005	blood	1	3	52	6	2	8	44	496
470.1538	2043	A. baumannii ABBL036	USA	2007	blood	13	1	2	3	6	1	16	497
470.1566	1000	A. baumannii TTU2014-131AME	USA	2014	animal	3	5	2	5	7	1	52	742
470.1568	3324	A. baumannii A186	Australia	2010	blood	1	3	2	1	4	4	4	10
470.1576	3069	A. baumannii Ab04-mff	Canada	2012	blood	1	3	2	1	4	4	4	10
470.1738	3072	A. baumannii CIP70.10	USA	1950	skin	3	2	7	2	7	1	3	126
470.1756	3061	A. baumannii A85	Australia	2003	sputum	1	1	1	1	5	1	1	1
470.1763	3073	A. baumannii KBN10P02143	South Korea	2012	wound	2	2	2	2	2	2	2	2
470.1807	1213	A. baumannii D15	Turkey	2009		6	6	8	2	3	5	4	15
470.1864	3171	A. baumannii XH860	China	2009		2	2	2	2	2	2	2	2
470.1865	3172	A. baumannii XH859	China	2009	wound	2	2	2	2	2	2	2	2
470.1866	3173	A. baumannii XH857	China	2010	sputum	27	2	7	2	2	1	2	215
470.1867	3174	A. baumannii XH856	China	2010	other	2	2	2	2	2	2	2	2
470.1869	3175	A. baumannii XH858	China	2010	sputum	1	3	10	1	4	4	4	23
470.1999	1130	A. baumannii ATCC 17978		1951	other	3	2	2	2	3	4	28	77
470.2026	3177	A. baumannii Ab421_GEIH-2010	Spain	2010		26	2	2	2	29	4	5	79
470.2422	1151	A. baumannii 28	Greece	2003	lower respiratory tract	5	2	4	1	3	3	4	85
470.2428	686	A. baumannii A074	Sweden	2012	urine	2	1	2	2	2	1	1	636
470.2437	687	A. baumannii A105	Sweden	2013	lower respiratory tract	2	1	2	2	2	1	1	636
470.2993	1333	A. baumannii Ab6	Chile	1998	lower respiratory tract	26	3	2	2	9	1	5	168
470.3102	3849	A. baumannii ATCC 17945		NA		1	62	156	2	40	4	4	1168
470.3340	1706	A. baumannii M3AC9-7	Puerto Rico	2009	blood	50	3	6	1	3	4	4	250
470.3514	3846	A. baumannii ARLG1933	USA	NA	other	3	67	154	2	11	1	8	1165
470.3774	3061	A. baumannii A85	Australia	2003	sputum	1	1	1	1	5	1	1	1
470.4023	751	A. baumannii AB173	China	2015	sputum	23	60	28	10	25	2	26	679
470.4024	750	A. baumannii AB172	China	2015	abdominal fluid	3	3	2	2	7	2	2	588
470.4043	759	A. baumannii AB174	China	2015	sputum	1	2	2	2	115	1	5	677
470.4045	1337	A. baumannii AB156	Argentina	1997	blood	1	16	2	6	18	4	4	172
470.4259	3301	A. baumannii 151/1C	Poland	2013		12	100	2	2	9	1	4	923
470.4260	3374	A. baumannii 29R1	Poland	2014	animal	1	3	2	2	2	4	29	927
470.4262	3393	A. baumannii GB1-2	Germany	2015	animal	1	3	10	1	4	4	4	23
470.4264	3860	A. baumannii PLG9P835	Poland	2016	animal	3	3	2	1	166	2	14	1179
470.4266	3394	A. baumannii LoGeIst3-1	Germany	2015	animal	12	100	2	2	9	1	52	821
470.4268	3396	A. baumannii 86II/2C	Poland	2013	animal	3	3	2	1	7	2	14	690
470.4465	1024	A. baumannii AB307-0294	USA	1994	blood	1	1	1	1	5	1	1	1
470.4468	3834	A. baumannii ZQ8	Iraq	2016	blood	56	3	55	2	9	4	14	513
470.4469	3836	A. baumannii ZQ10	Iraq	2016	CSF	1	3	2	1	4	4	92	575
470.4470	3830	A. baumannii ZQ4	Iraq	2016	blood	3	4	2	2	7	1	2	203
470.4471	3831	A. baumannii ZQ5	Iraq	2016	wound	1	1	1	1	5	1	1	1
470.4472	3833	A. baumannii ZQ7	Iraq	2016	sputum	2	2	2	2	2	2	2	2
470.4473	3832	A. baumannii ZQ6	Iraq	2016	wound	1	1	1	1	5	1	1	1
470.4474	3828	A. baumannii ZQ2	Iraq	2016	sputum	2	2	2	2	2	2	2	2
470.4475	3829	A. baumannii ZQ3	Iraq	2016	blood	1	1	1	1	5	1	30	717
470553	2968	A. baumannii A33405	Argentina	NA	lower respiratory tract	26	72	2	2	29	4	5	422
470555	2942	A. baumannii 341	Malaysia	2013	sputum	2	2	2	2	2	2	2	2
470556	2284	A. baumannii A144	Argentina	1997	blood	1	1	1	1	5	1	1	1
470557	2368	A. baumannii MAR002	Spain	2010	wound	3	3	2	2	29	4	14	271
470562	726	A. baumannii T185	Thailand	2010		2	2	2	2	2	2	2	2
470563	727	A. baumannii T188	Thailand	2010		2	2	2	2	2	2	2	2
470564	729	A. baumannii T229	Thailand	2010		3	5	5	26	13	1	2	653
470565	730	A. baumannii T258	Thailand	2010		2	2	2	2	2	2	2	2
470566	731	A. baumannii T271	Thailand	2010		27	2	7	2	2	1	2	215
470568	725	A. baumannii T173	Thailand	2010		2	2	2	2	2	2	2	2
470569	728	A. baumannii T214	Thailand	2010		1	3	2	1	4	4	4	10
470773	3064	A. baumannii 6200	Colombia	2012		5	2	4	1	3	4	4	464
470775	3067	A. baumannii A1	UK	1982		1	1	1	1	5	1	1	1
480119.5	1023	A. baumannii AB0057	USA	2004	blood	1	1	1	1	5	1	1	1
48296175	3856	A. baumannii ABUH540	USA	2011	sputum	171	92	28	10	72	18	20	1175
48296.19	744	A. baumannii CR12-42	Australia	2013		36	20	38	16	38	18	20	119
48296194	3854	A. baumannii ARLG1771	USA	NA		17	21	158	10	20	13	20	1173
48296.20	733	A. baumannii T167	Thailand	2010		101	20	97	10	72	18	98	655
48296201	3857	A. baumannii ARLG1807	USA	NA		172	20	23	10	25	18	20	1176
48296206	3850	A. baumannii ARLG1957	USA	NA		36	20	38	16	38	18	44	1169
48296207	3855	A. baumannii ARLG1961	USA	NA		60	21	46	10	20	13	20	1174
48296230	3852	A. baumannii UBA2484	USA	NA	environment	36	20	157	16	38	18	20	1171
48296.29	3859	A. baumannii NBRC 110508	Japan	NA	sputum	17	20	159	10	20	29	44	1178
48296.30	3853	A. baumannii NBRC 110510	Japan	NA	abscess	17	20	46	10	20	13	20	1172
48296.44	3858	A. baumannii ABBL098	USA	2010	blood	94	55	88	50	130	44	149	1177
48296.60	3851	A. baumannii ABBL033	USA	2006	blood	45	162	138	10	20	18	56	1170
497978.4	2758	A. baumannii MDR-ZJ06	China	2006	blood	2	2	2	2	2	2	2	2
509170.6	1096	A. baumannii SDF	France	NA	animal	3	29	30	1	9	1	4	17
509173.8	1022	A. baumannii AYE	France	2001	urine	1	1	1	1	5	1	1	1
525242.3	2767	A. baumannii 6014059	USA	NA	skin	2	2	2	2	2	2	2	2
525243.3	2248	A. baumannii 6013150	USA	NA	skin	1	1	1	1	5	1	2	81
557600.4	1024	A. baumannii AB307-0294	USA	1994	blood	1	1	1	1	5	1	1	1
557601.3	1121	A. baumannii AB900	USA	2003	other	3	3	6	2	3	1	5	49
575564.3	3012	A. baumannii RUH2624	The Netherlands	1987	skin	20	26	26	14	26	16	25	71
575584.19	2295	A. baumannii ATCC 19606	The Netherlands	NA	urine	3	2	2	7	9	1	5	52
575584.3	2295	A. baumannii ATCC 19606	The Netherlands	NA	urine	3	2	2	7	9	1	5	52
575584.33	2295	A. baumannii ATCC 19606	The Netherlands	NA	urine	3	2	2	7	9	1	5	52
592014.3	2249	A. baumannii 6013113	USA	NA	skin	1	1	1	1	5	1	2	81
696749.3	2755	A. baumannii 1656-2	USA	NA	lower respiratory tract	2	2	2	2	2	2	2	2
871585.3	3489	A. baumannii PHEA-2	China	NA		112	119	28	16	144	81	115	1164
886886.3	2773	A. baumannii AB210	UK	NA		2	2	2	2	2	2	2	2
886888.3	2774	A. baumannii 3990	Italy	2006	IV catheter	2	2	2	2	2	2	2	2
886889.3	1176	A. baumannii 3909	Italy	2006	blood	25	3	6	2	28	1	29	78
886890.3	1184	A. baumannii 4190	Italy	2009	lower respiratory tract	3	3	2	4	7	2	4	25
889738.3	2757	A. baumannii MDR-TJ	China	NA		2	2	2	2	2	2	2	2
903889.3	2734	A. baumannii OIFC137	USA	2003		3	3	2	2	3	1	3	3
903890.3	2683	A. baumannii OIFC032	Germany	2003		1	1	2	2	3	4	4	32
903892.3	2735	A. baumannii OIFC109	USA	2003		3	3	2	2	3	1	3	3
903893.3	2649	A. baumannii OIFC143	USA	1999	wound	3	3	2	4	7	2	4	25
903894.3	2781	A. baumannii OIFC189	USA	NA		2	2	2	2	2	2	2	2
903895.3	2257	A. baumannii Canada BC-5	Canada	2007		1	1	1	1	5	1	1	1
903896.3	2780	A. baumannii Naval-17	USA	NA		2	2	2	2	2	2	2	2
903897.3	2648	A. baumannii Naval-18	USA	2002	wound	3	3	2	4	7	2	4	25
903898.3	2732	A. baumannii Naval-81	USA	2006		3	3	2	2	3	1	3	3
903899.3	2736	A. baumannii IS-123	Iraq	2009	wound	3	3	2	2	3	1	3	3
903901.3	2264	A. baumannii OIFC074	Germany	2003		1	2	1	1	5	1	1	19
903902.3	2288	A. baumannii OIFC098	Germany	2003		1	3	2	1	4	4	4	10
903903.3	2805	A. baumannii OIFC180	USA	2003		2	2	2	2	2	2	2	2
903904.3	2737	A. baumannii Naval-13	USA	2006	wound	3	3	2	2	3	1	3	3
903905.3	2263	A. baumannii IS-235	Iraq	2008	blood	1	1	1	1	5	1	1	1
903906.3	2262	A. baumannii IS-251	Iraq	2008	upper respiratory tract	1	1	1	1	5	1	1	1
903907.3	1949	A. baumannii OIFC0162	USA	2012	upper respiratory tract	1	52	2	2	67	4	5	412
903908.3	1935	A. baumannii Naval-72	USA	2006	wound	5	3	16	4	29	1	60	405
903909.3	2265	A. baumannii Naval-83	USA	2003	wound	3	1	1	1	5	1	1	20
903910.3	1963	A. baumannii OIFC110	Germany	2013		56	3	2	2	5	4	14	418
903911.3	1951	A. baumannii IS-143	Iraq	2008	wound	2	2	2	2	2	37	2	414
903912.3	2300	A. baumannii IS-116	Iraq	NA	wound	3	2	19	25	5	2	5	136
903913.3	1944	A. baumannii WC-692	Iraq	2008	skin	56	3	55	2	5	4	14	407
903914.3	2258	A. baumannii IS-58	Iraq	2008	upper respiratory tract	1	1	1	1	5	1	1	1
903915.3	1978	A. baumannii WC-141	Iraq	2008	environment (medical)	65	73	62	33	69	38	61	432
903917.3	1947	A. baumannii WC-487	Iraq	2008	skin	20	26	26	14	26	16	23	410
903919.3	1968	A. baumannii WC-348	Iraq	2008	skin	1	52	2	2	67	4	5	412
903920.3	2807	A. baumannii Naval-113	USA	NA	wound	2	2	2	2	2	2	2	2
903921.3	1974	A. baumannii Naval-82	USA	2006	blood	3	1	2	3	6	1	16	428
903922.3	2376	A. baumannii Naval-2	USA	2002	blood	2	2	2	2	2	2	2	2
903923.3	2266	A. baumannii Naval-21	USA	2002	wound	1	2	1	1	5	1	1	19
903924.3	2267	A. baumannii Canada BC1	Canada	2007		1	1	1	1	5	1	1	1
903925.3	2738	A. baumannii WC-A-694	USA	2008		3	3	2	2	3	1	3	3
903926.3	1933	A. baumannii OIFC035	USA	1999	wound	3	2	6	1	3	4	59	403
903927.3	2694	A. baumannii Naval-57	USA	2002	wound	3	2	2	2	44	4	4	155
903929.3	2684	A. baumannii OIFC087	USA	2003	skin	1	1	2	2	3	4	4	32
903930.3	2685	A. baumannii OIFC099	USA	2003	environment	1	1	2	2	3	4	4	32
903931.3	1977	A. baumannii WC-A-92	USA	2007		1	4	2	1	70	1	2	431
903932.3	2312	A. baumannii OIFC065	USA	2003		3	2	19	25	5	2	5	136
903933.3	1976	A. baumannii OIFC047	USA	1999	other	1	75	2	2	5	1	2	430
903934.3	2809	A. baumannii OIFC338	USA	NA		2	2	2	2	2	2	2	2
903935.3	2719	A. baumannii OIFC111	USA	2003	skin	3	3	6	2	3	1	5	49
903936.3	2379	A. baumannii Naval-78	USA	NA	wound	2	2	2	2	2	2	2	2
903937.3	2313	A. baumannii AA-014	Iraq	2008	wound	41	42	13	1	5	4	14	158
927193.3	1934	A. baumannii A118	Argentina	2010	blood	3	49	61	2	5	2	4	404
933263.3	2374	A. baumannii UMB001	USA	NA	blood	2	2	2	2	2	2	2	2
933264.3	2666	A. baumannii UMB002	USA	NA	stool/rectal swab	7	7	2	2	8	4	4	16
933265.3	2645	A. baumannii UMB003	USA	2008	wound	3	3	2	4	7	2	4	25
945555.3	2772	A. baumannii WM99c	Australia	NA		2	2	2	2	2	2	2	2
945556.3	2241	A. baumannii D1279779	Australia	2011		12	37	2	2	3	2	14	267
980514.3	2759	A. baumannii TCDC-AB0715	Taiwan	NA		2	2	2	2	2	2	2	2
981325.3	3011	A. baumannii NCTC 8102	Czech Republic	NA		22	26	29	14	27	16	23	74
981328.3	2778	A. baumannii W6976		NA		2	2	2	2	2	2	2	2
981329.3	2779	A. baumannii W7282	UK	NA		2	2	2	2	2	2	2	2
981331.5	3005	A. baumannii CIP 81.8	The Netherlands	NA	environment	16	19	22	9	19	12	19	62
992402.3	2372	A. baumannii ABNIH1	USA	NA		2	2	2	2	2	2	2	2
992403.3	2775	A. baumannii ABNIH2	USA	NA		2	2	2	2	2	2	2	2
992404.3	2776	A. baumannii ABNIH3	USA	NA		2	2	2	2	68	2	2	415

## Sheet: abaumannii_MLSTar
Supplemental Table S2 (cont.). Acinetobacter baumannii genomes typed with MLSTar.
PATRIC_id	cpn60	fusA	gltA	pyrG	recA	rplB	rpoB	ST
106654.18	22	26	47	14	50	16	47	279
106654.21	55	26	54	14	58	16	47	322
106654.63	22	165	161	14	27	19	25	1182
106654.65	20	164	26	14	26	16	23	1183
106654.66	22	26	29	14	172	16	47	1166
1094469.3	2	2	2	2	2	2	2	2
1094470.3	1	1	1	1	5	1	1	1
1094474.3	1	1	1	1	5	1	1	1
1094475.3	1	1	1	1	5	1	1	1
1094477.3	2	2	2	2	2	2	2	2
1094478.3	2	2	2	2	2	2	2	2
1094479.3	2	2	2	2	2	2	2	2
1094480.3	2	2	2	2	2	2	2	2
1094481.3	2	2	2	2	2	2	2	2
1094482.3	2	2	2	2	2	2	2	2
1094483.3	1	1	1	1	5	1	1	1
1094484.3	2	2	2	2	2	2	2	2
1094486.3	2	2	2	2	2	2	2	2
1094487.3	2	2	2	2	2	2	2	2
1094488.3	2	2	2	2	2	2	2	2
1096995.4	2	2	2	2	2	2	2	2
1096996.4	1	3	10	1	4	4	4	23
1096997.4	2	2	2	2	2	2	2	2
1100841.3	2	2	2	2	2	2	2	2
1100842.3	2	2	2	2	2	2	2	2
1116234.3	1	1	1	1	5	1	1	1
1116234.8	1	1	1	1	5	1	1	1
1149135.4	3	3	2	4	7	2	4	25
1168588.3	2	2	2	2	2	2	2	2
1168590.3	3	71	2	2	5	4	14	419
1168591.3	2	2	2	2	2	2	2	2
1198108.3	2	2	2	2	2	2	2	2
1200350.3	2	2	2	2	2	2	2	2
1200351.3	2	137	2	2	2	2	2	NA
1210907.3	1	5	40	2	7	1	1	218
1216295.3	2	2	2	2	2	2	2	2
1217627.3	9	3	2	2	5	4	14	35
1217628.3	1	2	2	2	3	1	2	36
1217629.3	3	2	2	2	7	1	2	37
1217630.3	3	2	15	6	6	4	5	38
1217632.3	1	2	6	2	3	4	4	11
1217633.3	1	3	2	1	4	4	4	10
1217634.3	10	4	3	2	13	1	2	39
1217635.3	1	1	1	1	5	1	1	1
1217636.3	2	2	2	2	2	2	2	2
1217637.3	1	2	2	2	5	1	14	40
1217638.3	1	1	1	1	5	1	1	1
1217639.3	3	3	2	4	7	2	4	25
1217640.3	3	1	5	3	6	1	3	9
1217641.3	3	5	7	1	7	2	6	12
1217642.3	2	13	2	2	2	2	2	47
1217643.3	3	3	2	2	3	1	3	3
1217644.3	6	6	8	2	3	5	4	15
1217645.3	2	2	2	2	2	2	2	2
1217646.3	2	2	2	2	2	2	2	2
1217647.3	8	1	14	3	12	1	13	34
1217653.3	88	96	87	51	93	42	83	539
1217654.3	15	80	69	8	19	10	19	484
1217670.3	20	26	26	18	27	19	23	76
1217673.3	66	20	48	35	72	18	20	640
1217689.3	81	93	77	40	86	44	74	568
1217690.3	73	81	70	37	78	40	67	556
1217691.3	87	84	73	44	92	41	75	567
1217985.3	20	26	26	14	26	16	23	410
1221244.3	1	3	2	2	5	8	12	413
1221245.3	2	2	2	2	2	2	2	2
1221246.3	26	72	2	2	29	4	5	422
1221247.3	1	2	2	2	11	1	5	417
1221248.3	2	2	2	2	2	2	2	2
1221249.3	3	3	3	4	7	4	4	113
1221250.3	3	3	3	4	7	4	4	113
1221251.3	2	2	2	2	2	2	2	2
1221252.3	3	74	2	3	6	1	16	429
1221253.3	40	3	15	2	40	4	4	241
1221254.3	40	3	15	2	40	4	4	241
1221255.3	2	2	2	2	2	2	2	2
1221256.3	2	2	2	2	68	2	2	415
1221257.3	1	2	2	2	4	1	4	416
1221258.3	3	3	2	4	7	2	4	25
1221259.3	2	2	2	2	68	2	2	415
1221260.3	1	2	2	2	4	1	4	416
1221261.3	1	2	2	2	11	1	5	417
1221262.3	2	2	2	2	2	2	2	2
1221263.3	1	2	2	2	11	1	5	417
1221264.3	2	2	2	2	2	2	2	2
1221265.3	2	2	2	2	2	2	2	2
1221266.3	2	2	2	2	2	2	2	2
1221267.3	1	1	1	1	5	1	1	1
1221268.3	2	2	2	2	2	2	2	2
1221269.3	1	2	2	2	11	1	5	417
1221270.3	1	1	1	1	5	1	1	1
1221271.3	2	2	2	2	2	2	2	2
1221272.3	2	2	2	2	2	2	2	2
1221273.3	3	2	2	7	9	4	5	438
1221274.3	1	2	2	2	11	1	5	417
1221275.3	2	2	2	2	2	2	2	2
1221276.3	2	2	2	2	2	2	2	2
1221277.3	2	2	2	2	2	2	2	2
1221278.3	1	1	1	2	65	1	5	406
1221279.3	1	1	1	2	65	1	5	406
1221280.3	1	1	1	2	65	1	5	406
1221281.3	1	1	1	2	65	1	5	406
1221282.4	2	2	2	2	2	2	2	2
1221283.3	2	2	2	2	2	2	2	2
1221284.3	2	2	2	2	2	2	2	2
1221285.3	2	2	2	2	2	2	2	2
1221286.3	2	2	2	2	2	2	2	2
1221287.3	40	3	15	2	40	4	4	241
1221288.3	26	72	2	2	29	4	5	422
1221290.3	2	2	2	2	2	2	2	2
1221292.3	1	1	1	1	5	1	1	1
1222031.3	2	2	2	2	2	2	2	2
1222032.3	3	37	2	2	42	1	14	255
1222033.3	3	4	2	2	9	1	2	516
1223564.3	2	2	2	2	2	2	2	2
1224141.3	2	2	2	2	2	2	2	2
1224165.3	2	2	2	2	2	2	2	2
1224166.3	2	2	2	2	2	2	2	2
1224747.3	2	2	2	2	2	2	2	2
1236532.3	3	2	2	7	9	1	5	52
1278070.3	3	2	2	7	9	1	5	52
1293574.3	2	2	2	2	2	2	2	2
1310554.3	2	2	2	2	2	2	2	2
1310555.3	2	2	2	2	2	2	2	2
1310556.3	2	2	2	2	2	2	2	2
1310557.3	2	2	2	2	2	2	2	2
1310558.3	2	2	2	2	2	2	2	2
1310559.3	2	2	2	2	2	2	2	2
1310560.3	2	2	2	2	2	2	2	2
1310561.3	2	2	2	2	2	2	2	2
1310562.3	2	2	2	2	2	2	2	2
1310563.3	7	7	2	2	8	4	4	16
1310564.3	7	7	2	2	8	4	4	16
1310567.3	2	2	2	2	2	2	2	2
1310568.3	2	2	2	2	2	2	2	2
1310569.3	2	2	2	2	2	2	2	2
1310570.3	2	2	2	2	2	2	2	2
1310571.3	1	2	2	2	4	51	4	527
1310572.3	2	2	2	2	2	2	2	2
1310573.3	2	2	2	2	2	2	2	2
1310574.3	2	2	2	2	2	2	2	2
1310577.3	2	2	2	2	2	2	2	2
1310578.3	2	2	2	2	2	2	2	2
1310579.3	2	2	2	2	2	2	2	2
1310580.3	95	52	2	2	4	4	4	537
1310581.3	2	2	102	2	2	2	2	670
1310582.3	2	2	2	2	2	2	2	2
1310583.3	2	2	2	2	2	2	2	2
1310584.3	2	2	2	2	2	2	2	2
1310585.3	2	2	2	2	99	2	2	523
1310586.3	2	2	2	2	2	2	2	2
1310587.3	2	2	2	2	2	2	2	2
1310588.3	1	2	2	2	4	1	4	416
1310589.3	2	2	2	2	2	2	2	2
1310590.3	1	2	2	2	4	1	4	416
1310591.3	1	104	2	2	4	1	4	650
1310592.3	1	2	2	2	4	1	4	416
1310593.3	2	2	2	2	2	2	2	2
1310594.3	2	2	2	2	2	2	2	2
1310595.3	3	3	89	2	28	1	5	522
1310596.3	1	2	2	2	4	1	5	514
1310597.3	2	2	2	2	2	2	2	2
1310598.4	3	3	2	2	28	1	5	500
1310599.3	1	1	2	2	3	4	4	32
1310600.3	2	2	2	2	2	2	2	2
1310602.3	2	2	2	2	2	2	2	2
1310604.3	3	3	2	4	7	2	4	25
1310606.3	5	98	4	1	3	4	4	528
1310607.3	1	1	7	5	3	1	16	509
1310609.3	17	20	23	10	20	18	27	93
1310610.3	2	2	2	2	2	2	2	2
1310611.3	1	3	2	1	4	4	4	10
1310615.3	20	26	26	14	26	16	23	410
1310616.3	2	2	2	2	2	2	2	2
1310617.3	2	2	2	2	2	2	2	2
1310618.3	40	3	15	2	40	4	4	241
1310619.3	3	3	7	52	7	1	4	529
1310620.3	2	2	2	2	2	2	2	2
1310622.6	3	3	11	54	5	1	2	536
1310624.3	1	2	2	2	4	1	4	416
1310625.3	5	2	39	2	3	1	5	499
1310626.3	22	26	47	14	50	16	47	279
1310627.3	2	2	2	2	2	2	2	2
1310628.3	7	3	2	1	7	1	4	103
1310630.3	3	4	16	1	3	1	4	506
1310631.3	2	2	2	2	2	2	2	2
1310633.3	3	3	2	2	28	1	5	500
1310634.3	27	4	56	2	7	1	4	503
1310636.3	3	3	2	4	7	2	4	25
1310637.3	45	20	44	10	25	29	20	666
1310640.3	3	37	3	2	4	1	9	512
1310641.3	3	4	2	2	7	1	2	203
1310643.3	12	77	7	2	15	4	5	508
1310644.3	2	2	2	2	2	2	2	2
1310645.3	3	3	6	2	3	1	5	49
1310646.3	2	2	2	2	2	2	2	2
1310648.4	5	2	39	2	3	1	5	499
1310649.3	2	2	2	2	2	2	2	2
1310650.3	2	2	2	2	2	2	2	2
1310653.3	5	2	39	2	3	1	5	499
1310654.3	2	2	2	2	2	2	2	2
1310655.3	2	2	2	2	2	2	2	2
1310656.3	2	2	2	2	2	2	2	2
1310657.3	25	3	6	2	28	1	29	78
1310659.3	13	1	7	3	6	1	16	505
1310661.3	25	3	6	2	28	1	29	78
1310662.3	1	3	2	1	4	4	4	10
1310663.3	2	2	2	2	2	2	2	2
1310665.3	1	1	2	2	3	4	4	32
1310666.3	2	2	2	2	2	2	2	2
1310668.3	5	2	39	2	3	1	5	499
1310669.3	20	26	26	14	26	16	25	71
1310672.3	2	2	2	2	2	2	2	2
1310673.3	5	2	39	2	3	1	5	499
1310674.3	3	161	6	1	29	4	52	NA
1310675.3	2	2	2	2	2	2	2	2
1310676.3	1	2	2	2	4	1	5	514
1310677.3	47	47	50	14	26	16	49	224
1310679.3	2	2	2	2	2	2	2	2
1310681.3	104	108	104	10	72	59	100	675
1310684.3	13	1	7	3	101	1	16	533
1310686.3	5	2	39	2	3	1	5	499
1310688.3	3	41	6	1	3	4	5	154
1310689.3	23	20	28	10	25	18	20	667
1310691.3	1	2	2	2	4	1	5	514
1310692.3	3	2	2	1	9	4	14	519
1310693.4	7	7	2	2	8	4	4	16
1310694.3	7	7	2	2	8	4	4	16
1310695.3	20	26	26	14	26	16	25	71
1310696.88	20	26	26	14	26	16	25	71
1310698.3	2	2	2	2	2	2	2	2
1310699.3	2	2	2	2	2	2	2	2
1310700.3	3	17	7	2	18	1	2	56
1310701.3	7	7	2	2	8	4	4	16
1310702.3	25	3	6	2	28	1	29	78
1310703.3	35	1	11	7	9	25	2	108
1310705.3	20	26	26	14	26	16	23	410
1310706.3	3	53	56	2	9	8	2	510
1310707.3	3	67	2	2	102	4	4	651
1310708.3	2	2	2	2	2	2	2	2
1310710.3	1	3	2	1	4	4	4	10
1310712.3	2	2	2	2	2	2	2	2
1310713.3	2	2	2	2	2	2	2	2
1310716.3	2	2	2	2	113	2	2	671
1310717.3	2	2	2	2	2	2	2	2
1310718.3	2	2	2	2	2	2	2	2
1310719.3	5	2	39	2	3	1	5	499
1310721.3	5	2	39	2	3	1	5	499
1310722.3	2	2	2	2	2	2	2	2
1310724.3	66	21	48	35	72	18	62	NA
1310725.3	12	3	18	2	17	4	5	54
1310727.3	2	2	2	2	2	2	2	2
1310729.3	2	2	2	2	2	2	2	2
1310730.3	2	2	2	2	2	2	2	2
1310731.3	2	2	2	2	2	2	2	2
1310732.3	2	2	2	2	2	2	2	2
1310733.4	5	2	39	2	3	1	5	499
1310734.3	20	26	90	14	26	16	47	530
1310735.3	2	2	2	2	2	2	2	2
1310736.3	3	2	7	2	7	1	3	126
1310737.3	3	3	2	2	28	1	5	500
1310738.3	2	2	2	2	2	2	2	2
1310739.3	2	2	2	2	2	2	2	2
1310740.3	5	2	39	2	3	1	5	499
1310741.3	2	2	2	2	2	2	2	2
1310742.3	3	3	2	2	28	1	5	500
1310743.3	2	2	2	2	2	2	2	2
1310744.3	3	3	2	2	28	1	5	500
1310745.3	3	3	2	2	28	1	5	500
1310746.3	2	2	2	2	2	1	2	195
1310747.3	2	2	2	2	2	2	2	2
1310748.3	3	3	6	2	103	4	4	535
1310749.3	2	2	2	2	2	2	2	2
1310750.3	7	7	2	2	8	4	4	16
1310751.3	2	2	2	2	2	2	2	2
1310752.3	3	3	6	2	3	1	5	49
1310753.3	2	2	2	2	2	2	2	2
1310754.3	2	2	2	2	2	2	2	2
1310755.3	2	2	2	2	2	2	2	2
1310757.3	2	2	2	2	2	2	2	2
1310758.3	2	2	2	2	2	2	2	2
1310760.3	3	88	2	2	28	1	5	521
1310761.3	20	26	26	14	26	16	25	71
1310762.3	1	52	2	2	9	4	2	285
1310763.3	2	2	2	2	2	2	2	2
1310765.3	2	2	2	2	2	2	2	2
1310767.3	2	2	2	2	2	2	2	2
1310768.3	2	2	2	2	2	2	2	2
1310769.3	3	3	2	2	28	1	5	500
1310770.3	40	1	6	2	102	1	2	652
1310771.3	1	2	2	2	4	1	4	416
1310772.3	59	26	59	14	23	16	47	395
1310774.3	2	2	2	2	2	2	2	2
1310775.3	2	2	2	2	2	2	2	2
1310776.3	5	2	39	2	3	1	5	499
1310777.3	2	2	2	2	2	2	2	2
1310778.3	40	1	6	2	102	1	2	652
1310780.3	2	2	2	2	2	2	2	2
1310781.3	40	1	6	2	102	1	2	652
1310782.3	5	2	39	2	3	1	5	499
1310783.3	5	2	39	2	3	1	5	499
1310784.3	1	3	2	1	4	4	4	10
1310785.3	2	2	2	2	2	2	2	2
1310786.3	3	2	2	53	11	1	5	532
1310787.3	2	2	2	2	2	2	2	2
1310789.3	2	2	2	2	2	2	2	2
1310790.3	22	26	91	18	23	19	47	768
1310791.3	170	20	46	81	72	18	116	1167
1310792.3	2	2	2	2	2	2	2	2
1310793.3	2	2	2	2	2	2	2	2
1310794.3	2	2	2	2	2	2	2	2
1310795.3	20	24	26	14	23	16	23	68
1310796.3	2	2	2	2	2	2	2	2
1310797.3	2	2	2	2	2	2	2	2
1310798.3	5	2	39	2	3	1	5	499
1310799.3	2	2	2	2	2	2	2	2
1310801.3	2	2	2	2	2	2	2	2
1310802.3	2	2	2	2	2	2	2	2
1310803.3	2	2	2	2	2	2	2	2
1310805.3	2	2	2	2	2	2	2	2
1310806.3	6	2	8	2	2	2	2	1143
1310807.3	2	2	2	2	2	2	2	2
1310808.3	2	2	2	2	2	2	2	2
1310809.3	2	2	2	2	2	2	2	2
1310810.3	2	2	2	2	2	2	2	2
1310811.3	2	2	2	2	2	2	2	2
1310812.3	2	2	2	2	2	2	2	2
1310813.3	5	2	39	2	3	1	5	499
1310815.3	2	2	2	2	2	4	2	664
1310820.3	2	2	2	2	2	2	2	2
1310825.3	2	2	2	2	2	2	2	2
1310826.3	5	2	39	2	3	1	5	499
1310827.3	1	3	2	1	4	4	4	10
1310828.3	3	3	2	2	28	1	5	500
1310829.3	2	2	2	2	2	2	2	2
1310830.3	2	2	2	2	68	2	2	415
1310831.3	2	2	2	2	2	2	2	2
1310835.3	2	2	2	2	2	2	2	2
1310836.3	2	2	2	2	2	2	2	2
1310837.3	2	2	2	2	2	2	2	2
1310838.5	2	2	2	2	2	2	2	2
1310839.3	2	2	2	2	2	2	2	2
1310840.3	2	2	2	2	2	2	2	2
1310841.3	2	2	2	2	2	2	2	2
1310842.3	2	2	2	2	2	2	2	2
1310843.3	2	2	2	2	2	2	2	2
1310844.3	2	2	2	2	2	2	2	2
1310846.3	2	2	2	2	2	2	2	2
1310848.3	2	2	2	2	2	50	2	525
1310850.3	2	2	2	2	2	2	2	2
1310851.3	2	2	2	2	2	2	2	2
1310852.3	2	2	100	2	2	2	2	668
1310854.3	2	2	2	2	100	2	2	526
1310855.3	2	2	2	2	2	2	2	2
1310857.3	2	2	2	2	2	2	2	2
1310858.3	2	2	2	2	2	2	2	2
1310859.3	2	2	2	2	2	2	2	2
1310860.3	2	2	2	2	2	2	2	2
1310861.3	2	2	2	2	2	2	2	2
1310862.3	2	2	2	2	2	2	2	2
1310863.3	2	2	2	2	2	2	2	2
1310864.3	2	2	2	2	2	2	2	2
1310865.3	2	2	2	2	2	2	2	2
1310866.3	2	2	2	2	2	2	2	2
1310867.3	2	2	2	2	2	2	2	2
1310868.3	2	2	2	2	2	2	2	2
1310869.3	2	2	2	2	2	2	2	2
1310870.3	2	2	2	2	2	2	2	2
1310872.3	2	2	2	2	2	2	2	2
1310875.3	2	2	2	2	2	2	2	2
1310877.3	2	2	2	2	2	2	2	2
1310878.3	2	2	2	2	2	2	2	2
1310879.3	2	2	2	2	2	2	2	2
1310880.3	2	2	2	2	2	2	2	2
1310881.3	2	106	2	2	2	2	2	661
1310882.3	2	2	2	2	2	2	2	2
1310884.3	2	2	2	2	2	2	2	2
1310885.3	2	2	2	2	2	2	2	2
1310886.3	2	2	2	2	2	2	2	2
1310887.3	2	2	2	2	2	2	2	2
1310888.3	2	2	2	2	2	2	2	2
1310889.3	2	2	2	2	2	2	2	2
1310890.3	2	2	2	2	2	2	2	2
1310892.3	2	2	2	2	2	2	2	2
1310893.3	2	2	2	2	2	2	2	2
1310894.3	2	2	2	2	2	2	2	2
1310897.3	2	2	2	2	2	2	2	2
1310898.3	2	2	2	2	2	2	2	2
1310899.3	2	2	2	2	2	2	2	2
1310900.3	2	2	2	2	2	2	2	2
1310901.3	2	2	2	2	2	2	2	2
1310902.3	2	2	2	2	2	2	2	2
1310903.3	2	2	2	2	2	2	2	2
1310904.3	2	2	2	2	2	2	2	2
1310905.3	22	26	47	14	50	16	25	501
1310915.3	2	2	2	2	2	2	2	2
1310916.3	2	2	2	2	2	2	2	2
1310917.3	2	2	2	2	2	2	2	2
1310918.3	2	2	2	2	2	2	2	2
1310919.3	2	2	2	2	2	2	2	2
1310920.3	2	2	2	2	2	2	2	2
1310921.3	2	2	2	2	2	2	2	2
1310923.3	2	2	2	2	2	2	2	2
1310924.3	2	2	2	2	2	2	2	2
1310925.3	2	2	2	2	2	2	2	2
1310926.3	2	2	2	2	2	2	2	2
1310929.3	2	2	2	2	2	2	2	2
1310930.3	2	2	2	2	2	2	2	2
1310931.3	2	2	2	2	2	2	2	2
1310932.3	2	2	2	2	2	2	2	2
1310933.3	2	2	2	2	2	2	2	2
1310934.3	2	2	2	2	2	2	2	2
1310935.4	2	2	2	2	2	2	2	2
1310936.3	2	2	2	2	2	2	2	2
1310938.3	2	2	2	2	2	2	2	2
1310939.3	2	2	2	2	2	2	2	2
1310940.3	2	2	2	2	2	2	2	2
1310941.3	2	2	2	2	2	2	2	2
1310942.3	2	2	2	2	2	2	2	2
1310943.3	2	2	2	2	2	2	2	2
1310944.3	2	2	2	2	2	2	2	2
1310945.3	2	2	2	2	2	2	2	2
1310948.3	2	2	2	2	2	2	2	2
1310949.3	2	2	2	2	2	2	2	2
1310951.3	2	2	2	2	2	2	2	2
1310953.3	2	2	2	2	2	2	2	2
1310954.3	2	2	2	2	2	2	2	2
1310955.3	2	2	2	2	2	2	2	2
1310956.3	2	2	2	2	2	2	2	2
1310961.3	2	2	2	2	2	2	2	2
1310964.3	2	2	2	2	2	2	2	2
1310965.3	2	2	2	2	2	2	2	2
1310970.3	2	2	2	2	2	2	2	2
1310971.3	2	2	2	2	2	2	2	2
1310972.3	2	2	2	2	2	2	2	2
1310975.3	2	2	2	2	2	2	2	2
1310976.3	2	2	2	2	2	2	2	2
1310977.3	2	2	2	2	2	2	2	2
1310978.3	2	2	2	2	2	2	2	2
1310979.3	2	2	2	2	2	2	2	2
1310980.3	2	2	2	2	2	2	2	2
1310981.3	2	2	2	2	2	2	2	2
1310982.3	2	2	2	2	2	2	2	2
1310983.3	2	2	2	2	2	2	2	2
1310984.3	2	2	2	58	2	2	2	662
1310985.3	2	2	2	2	2	2	2	2
1310986.3	2	2	2	2	2	2	2	2
1310988.3	2	2	2	2	2	2	2	2
1310989.3	2	2	2	2	2	2	2	2
1310990.3	2	2	2	2	2	2	2	2
1310991.3	2	2	2	2	2	2	2	2
1310992.3	2	2	2	2	2	2	2	2
1311003.3	2	2	2	2	2	2	2	2
1311004.3	2	2	2	2	2	2	2	2
1311006.3	2	2	2	2	2	2	2	2
1311007.3	2	2	2	2	2	2	2	2
1311009.3	2	2	2	2	2	2	2	2
1311010.3	2	2	2	2	2	2	2	2
1311012.3	2	2	2	2	2	2	2	2
1311013.3	2	2	2	2	2	2	2	2
1311015.3	1	2	2	2	11	1	5	417
1311016.3	1	2	2	2	11	1	5	417
1311017.3	1	2	2	2	4	1	4	416
1311018.3	102	2	98	2	11	1	5	657
1311019.3	1	105	2	2	11	1	5	658
1311020.3	1	2	2	2	112	1	4	659
1311022.3	1	2	2	2	4	1	4	416
1311023.3	1	2	2	2	11	1	5	417
1311024.3	1	2	2	2	11	1	99	656
1311027.3	2	2	2	2	2	2	2	2
1311028.3	2	2	2	2	2	2	2	2
1311029.3	2	2	2	2	2	2	2	2
1311031.3	2	2	2	2	2	2	2	2
1311032.3	2	2	2	2	2	2	2	2
1311033.3	2	2	2	2	2	2	2	2
1311035.3	2	2	2	2	2	2	2	2
1311036.3	2	2	2	2	2	2	2	2
1311037.3	2	2	2	2	2	2	2	2
1311038.3	2	2	2	2	2	2	2	2
1311039.3	2	2	2	2	2	2	2	2
1311040.3	2	2	2	2	2	2	2	2
1311041.3	2	2	2	2	2	2	2	2
1311042.3	2	2	2	2	2	2	2	2
1311043.3	2	2	2	2	2	2	2	2
1311044.3	2	2	2	2	2	2	2	2
1311045.3	2	2	2	2	2	2	2	2
1311046.3	2	2	2	2	2	2	2	2
1311047.3	2	2	2	2	2	2	2	2
1311048.3	2	2	2	2	2	2	2	2
1311065.3	2	2	2	2	2	2	2	2
1311066.3	2	2	2	2	2	2	2	2
1311067.3	2	2	2	2	2	2	2	2
1311068.3	2	2	2	2	2	2	2	2
1311069.3	2	2	2	2	2	2	2	2
1311070.3	2	2	2	2	2	2	2	2
1311071.3	2	2	2	2	2	2	2	2
1311072.3	2	2	2	2	2	2	2	2
1311073.3	2	2	2	2	2	2	2	2
1311074.3	2	2	2	2	2	2	2	2
1311075.3	2	2	2	2	2	2	2	2
1311076.3	2	2	2	2	2	2	2	2
1311077.3	2	2	2	2	2	2	2	2
1311078.3	2	2	2	2	2	2	2	2
1311079.3	2	2	2	2	2	2	2	2
1311080.3	2	2	2	2	2	2	2	2
1311081.3	2	2	2	2	2	2	2	2
1311082.3	2	2	2	2	2	2	2	2
1311083.3	2	2	2	2	2	2	2	2
1311084.3	2	2	2	2	2	2	2	2
1311085.3	2	2	2	2	2	2	2	2
1311086.3	2	2	2	2	2	2	2	2
1311087.3	2	2	2	2	2	2	2	2
1311088.3	1	2	2	2	4	1	5	514
1311089.3	1	2	2	2	4	1	5	514
1311090.3	1	2	2	2	4	1	5	514
1311091.3	3	3	2	2	28	1	5	500
1311092.3	1	2	2	2	4	1	5	514
1311093.3	1	2	2	2	4	1	5	514
1311095.3	1	2	2	2	4	1	5	514
1311096.3	1	2	2	2	4	1	5	514
1311097.3	1	2	2	2	4	1	5	514
1311098.3	2	2	2	2	2	2	2	2
1311099.3	2	2	2	2	68	2	2	415
1311100.3	2	2	2	2	68	2	2	415
1311101.3	2	2	2	2	68	2	2	415
1311103.3	2	2	2	2	68	2	2	415
1311105.3	2	2	2	2	68	2	2	415
1311106.3	2	2	2	2	68	2	2	415
1311107.3	2	2	2	2	68	2	2	415
1311108.3	1	2	2	2	4	1	4	416
1311109.3	1	2	2	2	11	1	5	417
1311110.3	1	2	2	2	4	1	4	416
1311111.3	1	2	2	2	11	1	5	417
1311112.3	1	2	2	2	11	1	5	417
1311113.3	2	2	2	2	2	2	2	2
1311114.3	1	2	99	2	11	1	5	660
1311115.3	1	2	2	2	4	1	4	416
1311116.3	1	2	2	2	4	1	4	416
1311117.3	1	2	2	2	11	1	5	417
1311118.3	2	2	2	2	2	2	2	2
1311122.3	2	107	2	2	u2	2	2	NA
1311124.3	103	2	103	2	2	2	2	673
1311126.3	2	2	2	2	114	2	2	674
1311128.3	2	2	2	2	2	2	2	2
1311131.3	2	2	2	2	2	2	2	2
1311134.3	2	2	2	2	2	2	2	2
1311135.3	3	3	2	2	28	1	5	500
1311136.3	3	3	2	2	28	1	5	500
1311137.3	3	3	2	2	28	1	5	500
1311138.3	3	3	2	2	28	1	5	500
1311141.3	1	2	2	2	4	1	5	514
1311142.3	1	2	2	2	4	1	5	514
1311143.3	1	2	2	2	4	1	5	514
1311144.3	1	2	2	2	4	1	5	514
1311145.3	1	2	2	2	4	1	5	514
1315134.3	64	52	7	2	29	4	29	411
1315135.3	26	2	2	2	29	4	5	79
1315136.3	3	5	7	1	7	1	4	33
1315137.3	1	1	1	2	65	1	5	406
1315138.3	2	2	2	2	2	2	2	2
1315139.3	2	2	2	2	2	2	2	2
1315140.3	2	2	2	2	2	2	2	2
1315141.3	2	2	2	2	2	2	2	2
1315142.3	2	2	2	2	2	2	2	2
1315143.3	2	2	2	2	2	2	2	2
1315144.3	2	2	2	2	2	2	2	2
1315145.3	2	2	2	2	2	2	2	2
1315146.3	2	2	2	2	2	2	2	2
1315147.3	2	2	2	2	2	2	2	2
1315148.3	2	2	2	2	2	2	2	2
1315149.3	2	2	2	2	2	2	2	2
1315150.3	1	1	1	1	5	1	1	1
1315151.3	2	2	2	2	2	2	2	2
1315154.3	2	2	2	2	2	2	2	2
1315155.3	1	1	1	1	5	1	1	1
1315156.3	25	3	6	2	28	1	29	78
1315157.3	25	3	6	2	28	1	29	78
1315158.3	1	1	1	1	5	1	1	1
1315159.3	25	3	6	2	28	1	29	78
1315160.3	1	1	1	1	5	1	1	1
1315161.3	2	2	2	2	2	2	2	2
1315162.3	1	1	1	1	5	1	1	1
1315163.3	1	1	1	1	5	1	1	1
1315165.3	2	2	2	2	2	2	2	2
1315166.3	3	3	63	6	4	9	1	425
1315167.3	2	2	2	2	2	2	2	2
1315168.3	1	1	1	1	5	1	1	1
1315169.3	1	1	1	2	65	1	5	406
1315170.3	1	1	1	2	65	1	5	406
1315171.3	1	1	1	2	65	1	5	406
1315172.3	2	2	2	2	2	2	2	2
1315173.3	2	2	2	2	2	2	2	2
1315174.3	2	2	2	2	2	2	2	2
1315175.3	2	2	2	2	2	2	2	2
1315176.3	2	2	2	2	2	2	2	2
1315177.3	2	2	2	2	2	2	2	2
1315178.3	2	2	2	2	2	2	2	2
1315179.3	2	2	2	2	2	2	2	2
1315180.3	5	4	4	1	3	3	4	6
1315181.3	13	3	2	3	6	1	16	427
1315182.3	1	2	2	2	11	1	5	417
1315183.3	1	2	2	2	11	1	5	417
1315184.3	2	2	2	2	2	2	2	2
1315185.3	2	2	2	2	2	2	2	2
1340174.3	2	2	2	2	2	2	2	2
1340175.3	2	2	2	2	2	2	2	2
1340176.3	2	2	2	2	2	2	2	2
1343072.3	3	3	2	4	7	2	4	25
1343074.3	3	3	2	4	7	2	4	25
1343075.3	2	2	2	2	2	2	2	2
1349824.3	2	2	2	2	2	2	2	2
1351817.3	1	1	1	1	5	1	1	1
1358412.3	3	1	2	1	18	1	48	221
1370126.3	2	2	2	2	2	2	2	2
1398943.3	2	2	2	2	2	2	2	2
1398944.3	2	2	2	2	2	2	2	2
1398945.3	2	2	2	2	2	2	2	2
1398946.3	2	2	2	2	2	2	2	2
1398947.3	2	2	2	2	2	2	2	2
1398948.3	2	2	2	2	2	2	2	2
1398949.3	2	2	2	2	2	2	2	2
1398949.4	2	2	2	2	2	2	2	2
1398950.3	2	2	2	2	2	2	2	2
1398951.3	26	2	2	2	29	4	5	79
1398952.3	2	2	2	2	2	2	2	2
1398953.3	2	2	2	2	2	2	2	2
1398954.3	2	2	2	2	2	2	2	2
1398955.3	2	2	2	2	2	2	2	2
1398956.3	2	2	2	2	2	2	2	2
1398957.3	2	2	2	2	2	2	2	2
1398958.3	2	2	2	2	2	2	2	2
1398959.3	2	2	2	2	2	2	2	2
1398960.3	26	2	2	2	29	4	5	79
1398961.3	2	2	2	2	2	2	2	2
1398962.3	26	2	2	2	29	4	5	79
1398963.3	2	2	2	2	2	2	2	2
1398964.3	2	2	2	2	2	2	2	2
1398965.4	2	2	2	2	2	2	2	2
1398966.3	26	2	2	2	29	4	5	79
1398967.3	2	2	2	2	2	2	2	2
1398968.3	2	2	2	2	2	2	2	2
1398969.3	2	2	2	2	2	2	2	2
1398970.3	2	2	2	2	2	2	2	2
1398971.3	1	1	1	2	65	1	5	406
1398972.3	25	3	6	2	28	1	29	78
1398973.3	2	2	2	2	2	2	2	2
1398974.3	2	2	2	2	2	2	2	2
1398975.3	2	2	2	2	2	2	2	2
1398976.3	2	2	2	2	2	2	2	2
1398977.3	5	2	101	2	2	2	5	669
1398978.3	26	2	2	2	29	4	5	79
1398979.3	2	2	2	2	2	2	2	2
1398980.3	26	2	2	2	29	4	5	79
1398981.3	2	2	2	2	2	2	2	2
1398982.3	2	2	2	2	2	2	2	2
1398983.3	26	2	2	2	29	4	5	79
1398984.3	2	2	2	2	2	2	2	2
1398985.3	2	2	2	2	2	2	2	2
1398986.3	2	2	2	2	2	2	2	2
1398987.3	2	2	2	2	2	2	2	2
1398988.3	2	97	2	2	2	2	2	524
1398989.3	2	2	2	2	2	2	2	2
1398990.4	2	2	2	2	2	2	2	2
1398991.3	2	2	2	2	2	2	2	2
1398991.4	2	2	2	2	2	2	2	2
1400867.3	3	3	2	2	11	57	4	639
1401639.4	2	2	2	2	2	2	2	2
1409922.5	1	2	2	1	5	1	1	94
1409926.3	1	1	1	1	5	1	1	1
1409926.6	1	1	1	1	5	1	1	1
1434212.3	1	1	1	1	5	1	1	1
1435047.3	169	2	2	2	2	2	2	NA
1439316.7	2	2	2	2	2	2	2	2
1439317.3	20	26	90	14	26	16	47	530
1455315.3	1	3	2	1	4	4	4	10
1455315.5	1	3	2	1	4	4	4	10
1455316.3	1	1	1	1	5	1	1	1
1561081.3	94	55	77	50	106	44	88	606
400667.7	3	2	2	2	30	4	28	437
405416.6	2	2	2	2	2	2	2	2
470.1288	2	2	2	2	2	2	2	2
470.1289	5	2	39	2	3	1	5	499
470.1290	5	2	39	2	3	1	5	499
470.1291	1	63	2	2	9	4	3	621
470.1292	2	2	2	2	2	2	2	2
470.1293	5	2	39	2	3	1	5	499
470.1296	1	2	2	2	5	1	14	40
470.1297	1	2	2	2	5	1	14	40
470.1299	1	2	2	2	5	1	14	40
470.1300	3	2	2	7	9	1	5	52
470.1310	2	2	2	2	2	2	2	2
470.1311	2	2	2	2	2	2	2	2
470.1314	1	1	1	1	5	1	1	1
470.1345	1	1	1	1	5	1	1	1
470.1349	2	2	2	2	2	2	2	2
470.1351	3	2	2	7	9	1	5	52
470.1357	2	2	2	2	2	2	NA	NA
470.1358	3	1	5	3	29	2	3	654
470.1375	2	2	2	2	2	2	2	2
470.1384	3	2	2	1	29	4	4	1140
470.1421	27	3	2	3	6	1	16	498
470.1521	3	52	6	2	8	4	4	1022
470.1538	13	1	2	3	6	1	16	497
470.1566	3	5	2	5	7	1	52	742
470.1568	2	2	2	2	2	2	2	2
470.1576	1	3	2	1	4	4	4	10
470.1738	3	2	7	2	7	1	3	126
470.1756	1	1	1	1	5	1	1	1
470.1763	2	2	2	2	2	2	2	2
470.1807	1	1	1	1	5	1	1	1
470.1864	2	2	2	2	2	2	2	2
470.1865	2	2	2	2	2	2	2	2
470.1866	27	2	7	2	2	1	2	215
470.1867	2	2	2	2	2	2	2	2
470.1869	1	3	10	1	4	4	4	23
470.1999	3	2	2	2	30	4	28	437
470.2026	26	2	2	2	29	4	5	79
470.2422	3	3	2	2	4	8	12	111
470.2428	2	1	2	2	2	1	1	636
470.2437	2	1	2	2	2	1	1	636
470.2993	2	2	2	2	2	2	2	2
470.3102	1	62	156	2	40	4	4	1168
470.3340	50	3	6	1	3	4	4	250
470.3514	3	67	154	2	11	1	8	1165
470.3774	1	1	1	1	5	1	1	1
470.4023	2	2	2	2	2	2	2	2
470.4024	2	2	2	2	2	2	2	2
470.4043	2	2	2	2	2	2	2	2
470.4045	2	2	2	2	2	2	2	2
470.4259	12	100	2	2	9	1	4	923
470.4260	1	3	2	2	2	4	29	927
470.4262	1	3	10	1	4	4	4	23
470.4264	3	3	2	1	166	2	14	1179
470.4266	12	100	2	2	9	1	52	821
470.4268	3	3	2	1	7	2	14	690
470.4465	1	1	1	1	5	1	1	1
470.4468	56	3	55	2	9	4	14	513
470.4469	1	3	2	1	4	4	92	575
470.4470	3	4	2	2	7	1	2	203
470.4471	1	1	1	1	5	1	1	1
470.4472	2	2	2	2	2	2	2	2
470.4473	1	1	1	1	5	1	1	1
470.4474	2	2	2	2	2	2	2	2
470.4475	1	1	1	1	5	1	30	717
470553	26	2	2	2	29	4	5	79
470555	2	2	2	2	2	2	2	2
470556	1	1	1	1	5	1	1	1
470557	3	3	2	2	29	4	14	271
470562	2	2	2	2	2	2	2	2
470563	2	2	2	2	2	2	2	2
470564	3	5	5	26	13	1	2	653
470565	2	2	2	2	2	2	2	2
470566	27	2	7	2	2	1	2	215
470568	2	2	2	2	2	2	2	2
470569	1	3	2	1	4	4	4	10
470773	5	2	4	1	3	4	4	464
470775	1	1	1	1	5	1	1	1
480119.5	1	1	1	1	5	1	1	1
48296175	171	92	28	10	72	18	20	1175
48296194	17	21	158	10	20	13	20	1173
48296.19	36	20	38	16	38	18	20	119
48296201	172	20	23	10	25	18	20	1176
48296206	36	20	38	16	38	18	44	1169
48296207	60	21	46	10	20	13	20	1174
48296.20	101	20	97	10	72	18	98	655
48296230	36	20	157	16	38	18	20	1171
48296.29	17	20	159	10	20	29	44	1178
48296.30	17	20	46	10	20	13	20	1172
48296.44	94	55	88	50	130	44	149	1177
48296.60	45	162	138	10	20	18	56	1170
497978.4	2	2	2	2	2	2	2	2
509170.6	3	29	30	1	9	1	4	17
509173.8	1	1	1	1	5	1	1	1
525242.3	2	2	2	2	2	2	2	2
525243.3	1	1	1	1	5	1	2	81
557600.4	1	1	1	1	5	1	1	1
557601.3	3	3	6	2	3	1	5	49
575564.3	20	26	26	14	26	16	25	71
575584.19	3	2	2	7	9	1	5	52
575584.33	3	2	2	7	9	1	5	52
575584.3	3	2	2	7	9	1	5	52
592014.3	1	1	1	1	5	1	2	81
696749.3	2	2	2	2	2	2	2	2
871585.3	112	119	28	16	144	81	115	1164
886886.3	2	2	2	2	2	2	2	2
886888.3	2	2	2	2	2	2	2	2
886889.3	25	3	6	2	28	1	29	78
886890.3	3	3	2	4	7	2	4	25
889738.3	2	2	2	2	2	2	2	2
903889.3	3	3	2	2	3	1	3	3
903890.3	1	1	2	2	3	4	4	32
903892.3	3	3	2	2	3	1	3	3
903893.3	3	3	2	4	7	2	4	25
903894.3	2	2	2	2	2	2	2	2
903895.3	1	1	1	1	5	1	1	1
903896.3	2	2	2	2	2	2	2	2
903897.3	3	3	2	4	7	2	4	25
903898.3	3	3	2	2	3	1	3	3
903899.3	3	3	2	2	3	1	3	3
903901.3	1	2	1	1	5	1	1	19
903902.3	1	3	2	1	4	4	4	10
903903.3	2	2	2	2	2	2	2	2
903904.3	3	3	2	2	3	1	3	3
903905.3	1	1	1	1	5	1	1	1
903906.3	1	1	1	1	5	1	1	1
903907.3	1	52	2	2	67	4	5	412
903908.3	5	3	16	4	29	1	60	405
903909.3	3	1	1	1	5	1	1	20
903910.3	56	3	2	2	9	4	14	515
903911.3	2	2	2	2	2	37	2	414
903912.3	3	2	19	25	5	2	5	136
903913.3	56	3	55	2	9	4	14	513
903914.3	1	1	1	1	5	1	1	1
903915.3	65	73	62	33	69	38	61	432
903917.3	20	26	26	14	26	16	23	410
903919.3	1	52	2	2	67	4	5	412
903920.3	2	2	2	2	2	2	2	2
903921.3	3	1	2	3	6	1	16	428
903922.3	2	2	2	2	2	2	2	2
903923.3	1	2	1	1	5	1	1	19
903924.3	1	1	1	1	5	1	1	1
903925.3	3	3	2	2	3	1	3	3
903926.3	3	2	6	1	3	4	59	403
903927.3	3	2	2	2	44	4	4	155
903929.3	1	1	2	2	3	4	4	32
903930.3	1	1	2	2	3	4	4	32
903931.3	1	4	2	1	70	1	2	431
903932.3	3	2	19	25	5	2	5	136
903933.3	1	75	2	2	67	1	2	665
903934.3	2	2	2	2	2	2	2	2
903935.3	3	3	6	2	3	1	5	49
903936.3	2	2	2	2	2	2	2	2
903937.3	41	42	13	1	5	4	14	158
927193.3	3	49	61	2	5	2	4	404
933263.3	2	2	2	2	2	2	2	2
933264.3	7	7	2	2	8	4	4	16
933265.3	3	3	2	4	7	2	4	25
945555.3	2	2	2	2	2	2	2	2
945556.3	12	37	2	2	3	2	14	267
980514.3	2	2	2	2	2	2	2	2
981325.3	22	26	29	14	27	16	23	74
981328.3	2	2	2	2	2	2	2	2
981329.3	2	2	2	2	2	2	2	2
981331.5	16	19	22	9	19	12	19	62
992402.3	169	2	2	2	2	2	2	NA
992403.3	2	2	2	2	2	2	2	2
992404.3	2	2	2	2	68	2	2	415

## Sheet: bcereus_BIGSdb
Supplemental Table S2 (cont.). Bacillus cereus genomes typed from the BIGSdb.
PATRIC_id	BIGSdb_id	Isolate	Year	Source	glp	gmk	ilv	pta	pur	pyc	tpi	ST
1053166.3	1734	B. cereus AND1407	NA	other food	3	2	63	5	36	3	4	164
1053167.3	1607	B. cereus BAG1O-1	NA		213	116	223	223	118	107	128	934
1053171.3	1600	B. cereus BAG1X1-2	NA		15	20	145	8	4	8	170	928
1053172.3	1608	B. cereus BAG1X1-3	NA		213	116	223	223	118	107	128	934
1053177.3	1649	B. cereus BAG2O-2	NA		83	26	35	42	39	41	30	972
1053180.3	1655	B. cereus BAG2X1-2	NA		59	68	192	48	42	128	26	976
1053181.3	1620	B. cereus BAG2X1-3	NA		219	78	186	169	164	143	103	947
1053182.3	1635	B. cereus BAG3O-2	NA		37	9	14	18	20	14	7	959
1053185.3	1636	B. cereus BAG4O-1	NA		37	9	14	18	20	14	7	959
1053188.3	1650	B. cereus BAG5O-1	NA		43	74	35	40	39	41	30	973
1053189.3	1616	B. cereus BAG5X1-1	NA		218	87	104	69	103	185	18	943
1053191.3	1622	B. cereus BAG5X2-1	NA		102	130	107	22	96	20	26	949
1053193.3	1656	B. cereus BAG6O-2	NA		26	21	104	68	27	32	61	977
1053197.3	1735	B. cereus BtB2-4	NA	mud	64	10	22	36	83	23	11	410
1053198.3	1733	B. cereus CER057	NA	other food	64	10	22	36	83	23	11	410
1053199.3	1732	B. cereus CER074	NA	milk products	64	10	22	36	83	23	11	410
1053200.3	1956	B. cereus HD73	NA		7	8	16	13	2	16	7	8
1053201.3	1587	B. cereus HuA2-1	NA		18	10	5	216	200	136	167	914
1053204.3	1588	B. cereus HuA2-9	NA		23	10	5	216	201	38	11	915
1053205.3	1589	B. cereus HuA3-9	NA		165	103	189	176	202	145	11	916
1053206.3	1625	B. cereus HuA4-10	NA		64	132	249	228	213	190	178	952
1053207.3	1645	B. cereus HuB1-1	NA		15	20	23	8	4	64	39	968
1053218.3	1617	B. cereus MC118	NA		26	51	104	120	110	20	79	944
1053219.3	1618	B. cereus MC67	NA		26	51	104	120	110	168	79	945
1053222.3	1611	B. cereus MSX-D12	NA		217	2	122	5	19	3	91	938
1053223.3	1594	B. cereus VD014	NA		208	8	48	219	58	87	7	922
1053233.3	1637	B. cereus VD133	NA		7	8	15	12	2	16	7	960
1053240.3	1639	B. cereus VD166	NA		13	8	8	7	9	12	7	962
1053243.3	1641	B. cereus VD196	NA		14	8	9	81	60	12	7	964
1053245.3	1604	B. cereus VD214	NA		43	26	35	42	39	41	63	223
1085388.3	1619	B. cereus BAG3O-1	NA		81	53	117	71	209	93	80	946
1085389.3	1657	B. cereus B5-2	NA		81	53	117	193	113	93	80	978
1195464.3	1955	B. cereus MC28	NA		72	42	69	42	63	41	30	158
1217737.3	1962	B. cereus HD-789	NA		15	7	7	2	6	8	13	16
1217984.3	1966	B. cereus FRI-35	NA		6	4	41	5	43	46	3	90
1218175.3	1961	B. cereus HD-771	NA		15	7	7	2	7	10	13	12
1279365.3	1956	B. cereus HD73	NA		7	8	16	13	2	16	7	8
1286404.3	1957	B. cereus IS5056	NA		15	6	10	8	3	7	14	10
1347791.3	1654	B. cereus LCT-BC25	NA		19	2	21	5	114	3	2	975
1348059.3	1652	B. cereus LCT-BC235	NA		19	2	21	5	114	3	2	975
1392230	1929	B. cereus HYU01	2009	soil	2	1	1	1	1	1	1	3
1392231	1928	B. cereus 2000031021	NA	soil	65	1	1	1	1	1	1	933
1392236	1925	B. cereus Cvac02	2013	blood	1	1	1	1	1	1	1	1
1392251	1926	B. cereus PAK-1	1978	other	1	1	1	1	1	1	1	1
1392.86	1943	B. cereus Vollum 1B	1951	other	1	1	1	1	1	1	1	1
1392.87	1942	B. cereus K3	NA	other	1	1	1	1	1	1	1	1
1392.88	1941	B. cereus Ohio ACB	NA	other	1	1	1	1	1	1	1	1
1392.89	1940	B. cereus SK-102	1976	other	1	1	1	1	1	1	1	1
1392.90	1939	B. cereus Pasteur	NA	other	1	1	1	1	1	1	1	1
1392.91	1937	B. cereus BA1015	1939	other	1	1	2	1	1	2	1	2
1392.92	1936	B. cereus BA1035	NA	other	2	1	1	1	1	1	1	3
1392.93	1934	B. cereus RA3	1998	other	2	1	1	1	1	1	1	3
1392.94	1945	B. cereus 2002013094	1956	soil	65	1	1	1	1	1	1	933
1392837.3	1930	B. cereus SVA11	NA		2	1	1	1	1	1	1	3
1396501	1760	B. cereus FSL W8-0003	2012	milk products	19	2	239	5	19	3	2	1084
1396502	1759	B. cereus FSL W8-0268	2012	milk products	96	8	36	30	41	17	185	1083
1396503	1765	B. cereus FSL H8-0488	2006	environmental	43	26	35	42	39	41	30	111
1396504	1769	B. cereus FSL W8-0523	2012	milk products	117	4	123	118	43	6	3	1032
1396505	1771	B. cereus FSL W8-0275	2012	milk products	65	1	93	214	51	37	166	1050
1396506	1768	B. cereus FSL W8-0767	2012	milk products	172	71	14	29	24	14	7	787
1396507	1766	B. cereus FSL W8-0932	2013	milk products	34	1	32	1	18	33	24	365
1396508	1767	B. cereus FSL W8-0824	2012	milk products	12	8	9	14	11	12	10	24
1396509	1754	B. cereus FSL W8-0640	2012	milk products	40	28	14	26	2	25	7	1089
1396510	1762	B. cereus FSL K6-0067	2012	milk products	24	138	33	37	218	38	5	1086
1396511	1773	B. cereus FSL K6-0073	2012	milk products	22	9	18	18	20	19	7	33
1396512	1755	B. cereus FSL K6-0267	2012	milk products	144	10	22	36	158	129	11	1090
1396513	1761	B. cereus FSL M8-0117	2012	milk products	74	137	85	62	66	66	186	1085
1396514	1772	B. cereus FSL W8-0050	2012	milk products	5	4	3	4	15	6	16	32
1396515	1764	B. cereus FSL H8-0482	2006	environmental	43	26	35	42	39	41	63	223
1396516	1756	B. cereus FSL K6-0069	2012	milk products	224	135	237	233	53	56	148	1080
1396517	1774	B. cereus FSL H7-0926	2005	milk products	8	10	79	53	22	129	11	667
1396518	1775	B. cereus FSL K6-0040	2012	milk products	15	54	245	2	98	84	13	1101
1396519	1770	B. cereus FSL W8-0520	2012	milk products	117	4	123	118	43	6	3	1032
1396520	1758	B. cereus FSL W8-0483	2012	milk products	34	1	238	1	18	33	24	1082
1396560	2002	B. cereus FSL M7-0044	2011	milk products	102	136	267	22	236	20	26	1271
1396561	2007	B. cereus FSL M7-0938	2011	milk products	102	136	107	22	96	20	26	1269
1396562	2008	B. cereus FSL M7-1251	2011	milk products	102	35	107	22	96	20	26	1270
1396563	2010	B. cereus FSL J3-0113	2012	milk products	86	57	81	80	220	128	113	1094
1396564	2006	B. cereus FSL P2-0415	2009	milk products	102	35	171	22	96	20	78	1268
1396565	2009	B. cereus FSL P2-0558	2009	milk products	102	35	171	22	96	20	26	644
1396566	2005	B. cereus FSL P4-0569	2010	milk products	102	35	168	22	96	20	26	1266
1396723	2029	B. cereus FSL H8-0485	2006	soil	18	10	174	36	17	22	11	1142
1396724	2021	B. cereus FSL M8-0091	2012	milk products	59	68	81	48	42	101	26	564
1396726	2120	B. cereus FSL K6-1030	2013	milk products	13	8	9	28	4	12	10	NA
1405.10	190	B. cereus ATCC 6462	NA		25	10	22	53	57	23	44	116
1405.26	2106	B. cereus FSL E2-0214	2014	milk products	64	10	22	36	83	23	11	410
1405.27	2025	B. cereus FSL H7-0683	2005	milk products	64	10	22	15	83	23	11	222
1405.28	2023	B. cereus FSL R5-0708	2006	milk products	64	10	22	165	57	23	11	1144
1428252	187	B. cereus 97-27	NA		62	1	57	52	55	37	43	113
1428482	1465	B. cereus HD133	NA		9	8	16	13	2	16	7	834
1454382.3	1999	B. cereus D17	NA		34	1	124	16	18	33	89	1263
261591.4	1927	B. cereus Vollum	NA		1	1	1	1	1	1	1	1
269801.10	656	B. cereus g9241	NA		24	22	33	37	34	38	5	78
269801.5	656	B. cereus g9241	NA		24	22	33	37	34	38	5	78
280355.4	1628	B. cereus A1055	NA		65	1	1	1	1	1	1	933
29338.3	2169	B. cereus 4G5	NA	other	30	8	16	13	2	16	7	25
334406.4	544	B. cereus NC7401	1974	faeces	3	2	31	5	16	3	4	26
361100.6	1972	B. cereus Q1	NA		3	2	21	17	36	3	4	266
405532.5	1974	B. cereus B4264	1969		14	8	40	19	2	17	17	89
405535.8	1971	B. cereus AH820	NA		65	1	56	1	1	53	24	460
526977.6	22	B. cereus ATCC 4342	1900		24	12	50	21	23	31	19	38
526980.3	17	B. cereus ATCC 10876	1945		22	9	18	18	20	19	7	33
526998.3	1646	B. cereus Rock1-4	NA	soil	134	13	84	84	84	73	74	969
527020.3	1016	B. cereus IBL 4222	1985	other	15	7	7	2	6	8	13	16
527021.3	1954	B. cereus Bt407	NA		15	6	10	8	3	7	14	10
527022.3	178	B. cereus BGSC 4AJ1	NA		57	1	52	1	1	52	1	107
527023.3	56	B. cereus T03a001	1962		7	8	16	13	2	16	7	8
527024.3	175	B. cereus BGSC 4Y1	NA	soil	24	12	33	37	48	31	19	104
527025.3	51	B. cereus T01001	1958		15	6	10	8	3	7	14	10
527027.3	102	B. cereus T13001	1976		12	8	11	11	9	13	5	17
527028.3	183	B. cereus BGSC 4CC1	NA		61	38	55	1	1	53	19	110
570416.11	1958	B. cereus YBT-1520	NA		7	8	16	13	2	16	7	8
572264.18	260	B. cereus 03BB102	2003	blood	34	1	32	1	33	37	24	11
572264.4	260	B. cereus 03BB102	2003	blood	34	1	32	1	33	37	24	11
768494.3	1932	B. cereus H9401	NA	wound	1	1	1	1	1	1	1	1

## Sheet: bcereus_MLSTar
Supplemental Table S2 (cont.). Bacillus cereus genomes typed using MLSTar.
PATRIC_id	glp	gmk	ilv	pta	pur	pyc	tpi	ST
1053166.3	3	2	63	5	36	3	4	164
1053167.3	213	116	223	223	118	107	128	934
1053171.3	15	20	145	8	4	8	170	928
1053172.3	213	116	223	223	118	107	128	934
1053177.3	83	26	35	42	39	41	30	972
1053180.3	59	68	192	48	42	128	26	976
1053181.3	219	78	186	169	164	143	103	947
1053182.3	37	9	14	18	20	14	7	959
1053185.3	37	9	14	18	20	14	7	959
1053188.3	43	74	35	40	39	41	30	973
1053189.3	218	87	104	69	103	202	18	1450
1053191.3	102	130	107	22	96	20	26	949
1053193.3	26	21	104	68	27	32	61	977
1053197.3	64	10	22	36	83	23	11	410
1053198.3	64	10	22	36	83	23	11	410
1053199.3	64	10	22	36	83	23	11	410
1053200.3	7	8	16	13	2	16	7	8
1053201.3	18	10	5	216	200	136	167	914
1053204.3	23	10	5	216	201	205	11	1452
1053205.3	165	103	189	176	202	145	11	916
1053206.3	64	132	249	228	213	190	178	952
1053207.3	15	20	23	8	4	64	39	968
1053218.3	26	51	104	120	110	180	79	1012
1053219.3	26	51	104	120	110	180	79	1012
1053222.3	217	2	122	5	19	3	91	938
1053223.3	208	8	48	219	58	87	7	922
1053233.3	7	8	15	12	2	16	7	960
1053240.3	13	8	8	7	9	12	7	962
1053243.3	14	8	9	81	60	12	7	964
1053245.3	43	26	35	42	39	41	63	223
1085388.3	81	53	117	71	209	93	80	946
1085389.3	81	53	117	193	113	93	80	978
1195464.3	72	42	69	42	63	41	30	158
1217737.3	15	7	7	2	6	8	13	16
1217984.3	6	4	41	5	43	46	3	90
1218175.3	15	7	7	2	7	10	13	12
1279365.3	7	8	16	13	2	16	7	8
1286404.3	15	6	10	8	3	7	14	10
1347791.3	19	2	21	5	114	3	2	975
1348059.3	19	2	21	5	114	3	2	975
1392230	2	1	1	1	1	1	1	3
1392231	65	1	1	1	1	1	1	933
1392236	1	1	1	1	1	1	1	1
1392251	1	1	1	1	1	1	1	1
1392.86	1	1	1	1	1	1	1	1
1392.87	1	1	1	1	1	1	1	1
1392.88	1	1	1	1	1	1	1	1
1392.89	1	1	1	1	1	1	1	1
1392.90	1	1	1	1	1	1	1	1
1392.91	1	1	2	1	1	2	1	2
1392.92	2	1	1	1	1	1	1	3
1392.93	2	1	1	1	1	1	1	3
1392.94	65	1	1	1	1	1	1	933
1392837.3	2	1	1	1	1	1	1	3
1396501	19	2	239	5	19	3	2	1084
1396502	96	8	36	30	41	17	185	1083
1396503	43	26	35	42	39	41	30	111
1396504	117	4	123	118	43	6	3	1032
1396505	65	1	93	214	51	37	166	1050
1396506	172	71	14	29	24	14	7	787
1396507	34	1	32	1	18	33	24	365
1396508	12	8	9	14	11	12	10	24
1396509	40	28	14	26	2	25	7	1089
1396510	24	138	33	37	218	38	5	1086
1396511	22	9	18	18	20	19	7	33
1396512	144	10	22	36	158	129	11	1090
1396513	74	137	85	62	66	66	186	1085
1396514	5	4	3	4	15	6	16	32
1396515	43	26	35	42	39	41	63	223
1396516	224	135	237	233	53	56	148	1080
1396517	8	10	79	53	22	129	11	667
1396518	15	54	245	2	98	84	13	1101
1396519	117	4	123	118	43	6	3	1032
1396520	34	1	238	1	18	33	24	1082
1396560	102	136	267	22	236	20	26	1271
1396561	102	136	107	22	96	20	26	1269
1396562	102	35	107	22	96	20	26	1270
1396563	86	57	81	80	220	128	113	1094
1396564	102	35	171	22	96	20	78	1268
1396565	102	35	171	22	96	20	26	644
1396566	102	35	168	22	96	20	26	1266
1396723	18	10	174	36	17	22	11	1142
1396724	59	68	81	48	42	101	26	564
1396726	13	8	9	28	4	12	10	NA
1405.10	25	10	22	53	57	23	44	116
1405.26	64	10	22	36	83	23	11	410
1405.27	64	10	22	15	83	23	11	222
1405.28	64	10	22	165	57	23	11	1144
1428252	62	1	57	52	55	37	43	113
1428482	9	8	16	13	2	16	9	15
1454382.3	34	1	124	16	18	33	89	1263
261591.4	1	1	1	1	1	1	1	1
269801.10	24	22	33	37	34	38	5	78
269801.5	198	22	33	37	34	38	5	NA
280355.4	65	1	1	1	1	1	1	933
29338.3	9	8	16	13	2	16	9	15
334406.4	3	2	31	5	16	3	4	26
361100.6	3	2	21	17	36	3	4	266
405532.5	14	8	40	19	2	17	17	89
405535.8	65	1	56	1	1	53	24	460
526977.6	24	12	50	21	23	31	19	38
526980.3	22	9	18	18	20	19	7	33
526998.3	134	13	84	84	84	73	74	969
527020.3	15	7	7	2	6	8	13	16
527021.3	15	6	10	8	3	7	14	10
527022.3	57	1	52	1	1	52	1	107
527023.3	7	8	16	13	2	16	7	8
527024.3	24	12	33	37	48	31	19	104
527025.3	15	6	10	8	3	7	14	10
527027.3	12	8	11	11	9	13	5	17
527028.3	61	38	55	1	1	53	19	110
570416.11	7	8	16	13	2	16	7	8
572264.18	34	1	32	1	33	37	24	11
572264.4	34	1	32	1	33	37	24	11
768494.3	1	1	1	1	1	1	1	1

## Sheet: bordetella_BIGSdb
Supplemental Table S2 (cont.). Bordetella genomes typed from the BIGSdb.
PATRIC_id	BIGSdb_id	Isolate	Country	Year	adk	fumC	glyA	tyrB	icd	pepA	pgm	ST
1208665.3	126	B. bronchiseptica D445	USA	NA	4	5	1	2	4	8	6	17
1331205.3	1454	B. holmesii CDC-H572-BH	Unknown	NA	11	9	17	9	1	14	16	80
1331207.3	1441	B. holmesii CDC-H629-BH	Unknown	NA	11	9	17	9	1	14	16	80
1331208.3	1443	B. holmesii CDC-H635-BH	Unknown	NA	11	9	17	9	1	14	16	80
1331210.3	1452	B. holmesii CDC-H719-BH	Unknown	NA	11	9	17	9	1	14	16	80
1331212.3	1451	B. holmesii CDC-H809-BH	Unknown	NA	11	9	17	9	1	14	16	80
1331213.3	1432	B. bronchiseptica F2	Unknown	NA	4	2	6	2	4	6	6	65
1331217.3	1418	B. bronchiseptica M435/02/3	Unknown	NA	2	2	12	1	1	4	2	11
1331218.3	1419	B. bronchiseptica M85/00/2	Unknown	NA	2	2	4	1	1	7	2	33
1331219.3	1427	B. bronchiseptica MBORD591	Unknown	NA	3	5	6	2	1	6	6	22
1331220.3	1426	B. bronchiseptica MBORD595	Unknown	NA	2	2	4	1	1	7	2	33
1331221.3	1425	B. bronchiseptica MBORD624	Unknown	NA	2	2	4	1	5	7	2	23
1331223.3	1424	B. bronchiseptica MBORD635	Unknown	NA	2	2	4	1	1	4	12	62
1331227.3	1423	B. bronchiseptica MBORD675	Unknown	NA	3	2	6	2	4	6	4	18
1331228.3	1422	B. bronchiseptica MBORD678	Unknown	NA	2	2	4	1	3	4	2	14
1331231.3	1417	B. bronchiseptica MBORD707	Unknown	NA	4	2	6	4	1	8	8	29
1331235.3	1416	B. bronchiseptica MBORD785	Unknown	NA	2	4	4	1	1	4	2	7
1331238.3	1415	B. bronchiseptica MBORD901	Unknown	NA	3	2	1	5	4	8	6	64
1331241.3	1431	B. bronchiseptica OSU095	Unknown	NA	4	2	1	2	2	8	7	28
1331242.3	1430	B. bronchiseptica OSU553	Unknown	NA	2	6	4	1	1	4	2	12
1331243.3	1429	B. bronchiseptica RB630	Unknown	NA	3	5	10	2	4	8	6	35
1331247.3	1579	B. pertussis 2250905	Unknown	NA	1	1	1	3	1	1	1	2
1331248.4	1578	B. pertussis 2356847	Unknown	NA	1	1	1	3	1	1	1	2
1331250.3	1433	B. bronchiseptica 345	Unknown	NA	6	2	9	4	1	9	7	21
1331251.3	1442	B. holmesii H620	Unknown	NA	11	9	17	9	1	14	16	80
1331263.3	1598	B. pertussis STO1-CHLA-0011	Unknown	NA	1	1	1	3	1	1	1	2
1331264.3	1587	B. pertussis H897	Unknown	NA	1	1	1	3	1	1	1	2
1331265.3	1586	B. pertussis H918	Unknown	NA	1	1	1	3	1	1	1	2
1331266.3	1588	B. pertussis H921	Unknown	NA	1	1	1	3	1	1	1	2
1331267.3	1585	B. pertussis H939	Unknown	NA	1	1	1	3	1	1	1	2
1331269.3	1561	B. pertussis STO1-SEAT-0004	Unknown	NA	1	1	1	3	1	1	1	2
1331270.3	1581	B. pertussis I002	Unknown	NA	1	1	1	3	1	1	1	2
1331271.3	1583	B. pertussis I036	Unknown	NA	1	1	1	3	1	1	1	2
1331272.3	1582	B. pertussis I176	Unknown	NA	1	1	1	3	1	1	1	2
1331273.3	1575	B. pertussis STO1-CHOC-0008	Unknown	NA	1	1	1	3	1	1	1	2
1331274.3	1563	B. pertussis STO1-CHOM-0012	Unknown	NA	1	1	1	3	1	1	1	2
1331275.3	1562	B. pertussis STO1-CNMC-0004	Unknown	NA	1	1	1	3	1	1	1	2
1331276.3	1568	B. pertussis STO1-CHOC-0016	Unknown	NA	1	1	1	3	1	1	1	2
1331277.3	1567	B. pertussis STO1-CHOC-0017	Unknown	NA	1	1	1	3	1	1	1	2
1331278.3	1566	B. pertussis STO1-CHOC-0018	Unknown	NA	1	1	1	3	1	1	1	2
1331279.3	1564	B. pertussis STO1-CHOC-0019	Unknown	NA	1	1	1	3	1	1	1	2
1331280.3	1565	B. pertussis STO1-CHOC-0021	Unknown	NA	1	1	1	3	1	1	1	2
1331281.3	1599	B. pertussis CHLA-13	Unknown	NA	1	1	1	3	1	1	1	2
1331282.3	1597	B. pertussis CHLA-15	Unknown	NA	1	1	1	3	1	1	1	2
1331283.3	1576	B. pertussis CHLA-20	Unknown	NA	1	1	1	3	1	1	1	2
1331284.3	1574	B. pertussis CHLA-26	Unknown	NA	1	1	1	3	1	1	1	2
1331285.3	1600	B. pertussis STO1-CHLA-0006	Unknown	NA	1	1	1	3	1	1	1	2
1458256.3	38	B. bronchiseptica 980	Unknown	NA	2	3	4	1	1	3	2	37
1458257.3	1403	B. bronchiseptica A1-7	Unknown	NA	2	1	4	1	1	4	2	38
1458258.3	1400	B. bronchiseptica B18-5 (C3)	Unknown	NA	2	2	4	1	3	4	2	14
1458259.3	1089	B. bronchiseptica D989	Unknown	NA	2	6	4	1	1	4	2	12
1458261.3	1406	B. bronchiseptica E012	Unknown	NA	5	3	3	1	1	3	2	27
1458264.3	1402	B. bronchiseptica 980-2	Unknown	NA	2	3	4	1	1	4	2	10
1458265.3	1405	B. bronchiseptica E010	Unknown	NA	5	3	3	1	1	7	2	31
1458266.3	1407	B. bronchiseptica E013	Unknown	NA	5	3	3	1	1	3	2	27
1458267.3	1440	B. holmesii 04P3421	Unknown	NA	11	9	17	9	1	14	16	80
1458269.3	1410	B. bronchiseptica D756	Unknown	NA	2	6	4	1	1	4	2	12
1458277.3	1519	B. pertussis B200	Unknown	NA	1	1	1	1	1	1	1	1
1460381.3	1517	B. pertussis H934	Unknown	NA	1	1	1	3	1	1	1	2
520533	1516	B. pertussis H784	Unknown	NA	1	1	1	3	1	1	1	2

## Sheet: bordetella_MLSTar
Supplemental Table S2 (cont.). Bordetella genomes typed using MLSTar.
PATRIC_id	adk	fumC	glyA	tyrB	icd	pepA	pgm	ST
1208665.3	4	5	1	2	4	8	6	17
1331205.3	11	9	17	9	1	14	16	80
1331207.3	11	9	17	9	1	14	16	80
1331208.3	11	9	17	9	1	14	16	80
1331210.3	11	9	17	9	1	14	16	80
1331212.3	11	9	17	9	1	14	16	80
1331213.3	4	2	6	2	4	6	6	65
1331217.3	2	2	12	1	1	4	2	11
1331218.3	2	2	4	1	1	7	2	33
1331219.3	3	5	6	2	1	6	6	22
1331220.3	2	2	4	1	1	7	2	33
1331221.3	2	2	4	1	5	7	2	23
1331223.3	2	2	4	1	1	4	12	62
1331227.3	3	2	6	2	4	6	4	18
1331228.3	2	2	4	1	3	4	2	14
1331231.3	4	2	6	4	1	8	8	29
1331235.3	2	4	4	1	1	4	2	7
1331238.3	3	2	1	5	4	8	6	64
1331241.3	4	2	1	2	2	8	7	28
1331242.3	3	5	10	2	4	8	6	35
1331243.3	2	6	4	1	1	4	2	12
1331247.3	1	1	1	3	1	1	1	2
1331248.4	1	1	1	3	1	1	1	2
1331250.3	6	2	9	4	1	9	7	21
1331251.3	11	9	17	9	1	14	16	80
1331263.3	1	1	1	3	1	1	1	2
1331264.3	1	1	1	3	1	1	1	2
1331265.3	1	1	1	3	1	1	1	2
1331266.3	1	1	1	3	1	1	1	2
1331267.3	1	1	1	3	1	1	1	2
1331269.3	1	1	1	3	1	1	1	2
1331270.3	1	1	1	3	1	1	1	2
1331271.3	1	1	1	3	1	1	1	2
1331272.3	1	1	1	3	1	1	1	2
1331273.3	1	1	1	3	1	1	1	2
1331274.3	1	1	1	3	1	1	1	2
1331275.3	1	1	1	3	1	1	1	2
1331276.3	1	1	1	3	1	1	1	2
1331277.3	1	1	1	3	1	1	1	2
1331278.3	1	1	1	3	1	1	1	2
1331279.3	1	1	1	3	1	1	1	2
1331280.3	1	1	1	3	1	1	1	2
1331281.3	1	1	1	3	1	1	1	2
1331282.3	1	1	1	3	1	1	1	2
1331283.3	1	1	1	3	1	1	1	2
1331284.3	1	1	1	3	1	1	1	2
1331285.3	1	1	1	3	1	1	1	2
1458256.3	2	3	4	1	1	4	2	10
1458257.3	2	1	4	1	1	4	2	38
1458258.3	2	2	4	1	3	4	2	14
1458259.3	2	6	4	1	1	4	2	12
1458261.3	5	3	3	1	1	3	2	27
1458264.3	2	3	4	1	1	4	2	10
1458265.3	5	3	3	1	1	7	2	31
1458266.3	5	3	3	1	1	3	2	27
1458267.3	11	9	17	9	1	14	16	80
1458269.3	2	6	4	1	1	4	2	12
1458277.3	1	1	1	1	1	1	1	1
1460381.3	1	1	1	3	1	1	1	2
520533	1	1	1	3	1	1	1	2

## Sheet: saureus_BIGSdb
Supplemental Table S2 (cont.). Staphylococcus aureus genomes typed from the BIGSdb.
PATRIC_id	BIGSdb_id	Isolate	Country	Year	Source	arcC	aroE	glpF	gmk	pta	tpi	yqiL	ST
1144272.3	2179	S. aureus GR1	India	2003		4	3	1	1	11	72	11	672
1182756.4	2371	S. aureus Newbould 305	Unknown	NA		3	1	1	1	1	5	53	115
1194085.3	5294	S. aureus SA40	Spain	2007		3	3	1	1	4	4	3	8
1221452.3	2827	S. aureus 333	The Netherlands	2008		52	79	54	18	56	32	65	479
1274985.3	4412	S. aureus SK1585	Australia	1973		2	14	8	6	10	3	3	2249
1280.10108	5912	S. aureus Sa14-006	Australia	2014		353	66	46	2	7	50	18	3184
1280.10138	5911	S. aureus Sa13-001	Australia	2013		3	1	1	1	1	346	3	3183
1280.10468	5842	S. aureus MRSA 041T (B)	Tanzania	NA		1	4	1	8	355	4	3	3118
1280.10526	5860	S. aureus GKP138-50	UK	2012		6	72	12	43	49	67	388	3134
1280.10539	5851	S. aureus GKP138-61	UK	2012		3	1	1	1	1	340	3	3125
1280.10540	5853	S. aureus GKP138-39	UK	2012		18	1	1	1	1	5	381	3127
1280.13665	32754	S. aureus UV1026	Venezuela	2012		1	4	1	4	12	1	28	105
1280.13697	32981	S. aureus UB563	Brazil	2012		2	3	1	1	4	4	76	4359
1280.14693	1514	S. aureus B2	Norway	2003		10	14	8	6	61	3	2	455
1280.14698	1839	S. aureus C7	Cambodia	2006		4	168	136	8	1	10	8	1028
1280.14700	5153	S. aureus SA36	Brazil	2009		1	4	1	4	12	1	28	105
1280.14701	5150	S. aureus SA33	Brazil	2009		1	4	1	4	12	1	28	105
1280.14703	5156	S. aureus SA43	Brazil	2009		1	4	1	4	12	1	10	5
1280.3376	31841	S. aureus ILRI_Eymole1/1	Kenya	2004	Respiratory disease	2	2	2	2	6	3	2	30
1280.3779	859	S. aureus E4278	Denmark	1969		3	3	1	12	4	4	16	247
1280.3780	859	S. aureus E4278	Denmark	1969		3	3	1	12	4	4	16	247
1280.3781	842	S. aureus E2125	Denmark	1964		3	3	1	12	4	4	16	247
1280.3782	859	S. aureus E4278	Denmark	1969		3	3	1	12	4	4	16	247
1280.3783	859	S. aureus E4278	Denmark	1969		3	3	1	12	4	4	16	247
1280.3784	859	S. aureus E4278	Denmark	1969		3	3	1	12	4	4	16	247
1280.3785	842	S. aureus E2125	Denmark	1964		3	3	1	12	4	4	16	247
1280.3786	859	S. aureus E4278	Denmark	1969		3	3	1	12	4	4	16	247
1280.3787	859	S. aureus E4278	Denmark	1969		3	3	1	12	4	4	16	247
1280.3788	842	S. aureus E2125	Denmark	1964		3	3	1	12	4	4	16	247
1280.3789	842	S. aureus E2125	Denmark	1964		3	3	1	12	4	4	16	247
1280.3790	842	S. aureus E2125	Denmark	1964		3	3	1	12	4	4	16	247
1280.3791	859	S. aureus E4278	Denmark	1969		3	3	1	12	4	4	16	247
1280.3792	859	S. aureus E4278	Denmark	1969		3	3	1	12	4	4	16	247
1280.3793	859	S. aureus E4278	Denmark	1969		3	3	1	12	4	4	16	247
1280.3794	859	S. aureus E4278	Denmark	1969		3	3	1	12	4	4	16	247
1280.3795	859	S. aureus E4278	Denmark	1969		3	3	1	12	4	4	16	247
1280.3796	842	S. aureus E2125	Denmark	1964		3	3	1	12	4	4	16	247
1280.4102	49	S. aureus H65	UK	1997		7	6	1	5	8	8	6	22
1280.4255	1721	S. aureus 06-01203	Germany	2006		7	6	1	5	110	8	6	902
1280.4270	1901	S. aureus 06-01583	Germany	2006		7	6	1	5	131	8	6	1082
1280.4327	794	S. aureus 90/10685	UK	2002		7	6	1	5	8	8	6	22
1280.4566	5552	S. aureus BU_N22_t6	Ghana	2013	Buruli ulcer	10	14	8	6	10	3	368	3019
1280.4613	842	S. aureus E2125	Denmark	1964		3	3	1	12	4	4	16	247
1280.4614	842	S. aureus E2125	Denmark	1964		3	3	1	12	4	4	16	247
1280.4615	842	S. aureus E2125	Denmark	1964		3	3	1	12	4	4	16	247
1280.4617	859	S. aureus E4278	Denmark	1969		3	3	1	12	4	4	16	247
1280.4622	842	S. aureus E2125	Denmark	1964		3	3	1	12	4	4	16	247
1280.4636	842	S. aureus E2125	Denmark	1964		3	3	1	12	4	4	16	247
1280.4637	859	S. aureus E4278	Denmark	1969		3	3	1	12	4	4	16	247
1280.4640	842	S. aureus E2125	Denmark	1964		3	3	1	12	4	4	16	247
1280.4643	859	S. aureus E4278	Denmark	1969		3	3	1	12	4	4	16	247
1280.4802	842	S. aureus E2125	Denmark	1964		3	3	1	12	4	4	16	247
1280.4816	886	S. aureus HDE288	Portugal	1996		1	4	1	4	12	1	10	5
1280.4818	886	S. aureus HDE288	Portugal	1996		1	4	1	4	12	1	10	5
1280.4819	870	S. aureus BK2529	USA	1996		3	3	1	1	4	4	3	8
1288968.3	2915	S. aureus S0460	The Netherlands	2004		3	35	19	2	159	26	39	1391
1413476.3	4091	S. aureus C3672	Spain	2010		3	35	19	2	20	26	39	398
1413585.3	5124	S. aureus ZTA11/00189-8HSA	Spain	2011		307	35	19	2	20	26	39	2729
1422231.3	2000	S. aureus DAR1295	USA	2007		1	4	1	4	140	1	10	1184
1422269.3	2002	S. aureus DAR2002	USA	2007		1	4	1	4	141	1	10	1186
1422272.3	2003	S. aureus DAR2026	USA	2007		1	184	1	4	12	1	28	1187
282458.4	104	S. aureus MRSA252	UK	1997		2	2	2	2	3	3	2	36
46170369	33128	S. aureus UAMS-1	USA	NA		2	2	2	2	6	3	2	30
46170.84	33128	S. aureus UAMS-1	USA	NA		2	2	2	2	6	3	2	30
585148.3	441	S. aureus Btn1260	UK	1999		2	2	2	2	6	3	2	30
585149.6	78	S. aureus C101	UK	1997		2	2	2	2	6	3	2	30
585151.3	135	S. aureus C427	UK	1997		8	2	2	11	2	2	2	42
585152.3	252	S. aureus D139	UK	1997		8	7	6	2	9	9	21	145
585153.3	834	S. aureus E1410	Denmark	1962		2	2	2	2	6	3	2	30
585154.3	502	S. aureus EMRSA16	UK	2002		2	2	2	2	3	3	2	36
585155.3	154	S. aureus H19	UK	1997		8	7	6	2	9	9	7	10
585161.3	474	S. aureus WW2703/97	Germany	1997		2	2	2	2	6	3	2	30

## Sheet: saureus_MLSTar
Supplemental Table S2 (cont.). Staphylococcus aureus genomes typed using MLSTar.
PATRIC_id	arcC	aroE	glpF	gmk	pta	tpi	yqiL	ST
1182756.4	3	1	1	1	1	5	53	115
1274985.3	2	14	8	6	10	3	3	2249
1280.10108	353	66	46	2	7	50	18	3184
1280.10138	3	1	1	1	1	346	3	3183
1280.10468	1	4	1	8	355	4	3	3118
1280.10526	6	72	12	43	49	67	388	3134
1280.10539	3	1	1	1	1	340	3	3125
1280.10540	18	1	1	1	1	5	381	3127
1280.13665	1	4	1	4	12	1	28	105
1280.13697	2	3	1	1	4	4	76	4359
1280.14700	1	4	1	4	12	1	28	105
1280.14701	1	4	1	4	12	1	28	105
1280.14703	1	4	1	4	12	1	10	5
1280.3376	2	2	2	2	6	3	2	30
1280.3779	3	3	1	12	4	4	16	247
1280.3780	3	3	1	12	4	4	16	247
1280.3781	3	3	1	12	4	4	16	247
1280.3782	3	3	1	12	4	4	16	247
1280.3783	3	3	1	12	4	4	16	247
1280.3784	3	3	1	12	4	4	16	247
1280.3785	3	3	1	12	4	4	16	247
1280.3786	3	3	1	12	4	4	16	247
1280.3787	3	3	1	12	4	4	16	247
1280.3788	3	3	1	12	4	4	16	247
1280.3789	3	3	1	12	4	4	16	247
1280.3790	3	3	1	12	4	4	16	247
1280.3791	3	3	1	12	4	4	16	247
1280.3792	3	3	1	12	4	4	16	247
1280.3793	3	3	1	12	4	4	16	247
1280.3794	3	3	1	12	4	4	16	247
1280.3795	3	3	1	12	4	4	16	247
1280.3796	3	3	1	12	4	4	16	247
1280.4102	7	6	1	5	8	8	6	22
1280.4255	7	6	1	5	110	8	6	902
1280.4270	7	6	1	5	131	8	6	1082
1280.4327	7	6	1	5	8	8	6	22
1280.4566	10	14	8	6	10	3	368	3019
1280.4613	3	3	1	12	4	4	16	247
1280.4614	3	3	1	12	4	4	16	247
1280.4615	3	3	1	12	4	4	16	247
1280.4617	3	3	1	12	4	4	16	247
1280.4622	3	3	1	12	4	4	16	247
1280.4636	3	3	1	12	4	4	16	247
1280.4637	3	3	1	12	4	4	16	247
1280.4640	3	3	1	12	4	4	16	247
1280.4643	3	3	1	12	4	4	16	247
1280.4802	3	3	1	12	4	4	16	247
1280.4816	1	4	1	4	12	1	10	5
1280.4818	1	4	1	4	12	1	10	5
1280.4819	3	3	1	1	4	4	3	8
1288968.3	3	35	19	2	159	26	39	1391
1413476.3	3	35	19	2	20	26	39	398
1413585.3	307	35	19	2	20	26	39	2729
1422231.3	1	4	1	4	140	1	10	1184
1422269.3	1	4	1	4	141	1	10	1186
1422272.3	1	184	1	4	12	1	28	1187
282458.4	2	2	2	2	3	3	2	36
46170369	2	2	2	2	6	3	2	30
46170.84	2	2	2	2	6	3	2	30
585148.3	2	2	2	2	6	3	2	30
585149.6	2	2	2	2	6	3	2	30
585151.3	8	2	2	11	2	2	2	42
585152.3	8	7	6	2	9	9	21	145
585153.3	2	2	2	2	6	3	2	30
585154.3	2	2	2	2	3	3	2	36
585155.3	8	7	6	2	9	9	7	10
585161.3	2	2	2	2	6	3	2	30
1144272.3	4	3	1	1	11	72	430	1692
1194085.3	19	23	15	2	19	20	15	59
1221452.3	1	1	1	1	22	1	1	772
1280.14693	1	4	1	4	12	1	10	5
1280.14698	1	4	1	4	12	1	10	5

## Sheet: cjejunicoli_BIGSdb
Supplemental Table S2 (cont.). Campylobacter jejuni/coli genomes typed from the BIGSdb.
BIGSdb_id	Isolate	Country	Year	Source	aspA	glnA	gltA	glyA	pgm	tkt	uncA	ST
46300	Campylobacter coli APHAP1	UK	NA	chicken	124	39	30	82	189	47	74	2195
47327	Campylobacter jejuni APHAP2	UK	NA	chicken	24	2	2	2	10	3	3	5136
47338	Campylobacter coli APHAP3	UK	NA	chicken	33	39	30	82	113	47	17	825
47349	Campylobacter jejuni APHAP4	UK	NA	chicken	7	17	2	2	23	3	12	4243
47351	Campylobacter jejuni APHAP5	UK	NA	chicken	9	2	4	62	4	5	6	257
47358	Campylobacter coli APHAP6	UK	NA	chicken	33	39	30	82	104	43	17	828
47467	Campylobacter jejuni APHAP7	UK	NA	chicken	7	17	2	15	23	3	12	51
47468	Campylobacter coli APHAP8	UK	NA	chicken	33	39	30	391	104	47	17	4422
47469	Campylobacter jejuni APHAP9	UK	NA	chicken	2	10	2	4	19	3	6	1044
47470	Campylobacter jejuni APHAP10	UK	NA	chicken	4	7	10	4	1	7	1	45
47471	Campylobacter jejuni APHAP11	UK	NA	chicken	9	2	4	62	4	5	6	257
47472	Campylobacter jejuni APHAP12	UK	NA	chicken	9	2	4	62	4	5	6	257
47473	Campylobacter jejuni APHAP13	UK	NA	chicken	7	28	4	28	17	34	12	573
47474	Campylobacter jejuni APHAP14	UK	NA	chicken	9	2	4	62	4	5	6	257
47475	Campylobacter jejuni APHAP15	UK	NA	chicken	7	28	4	28	17	34	12	573
47476	Campylobacter jejuni APHAP16	UK	NA	chicken	9	2	4	62	4	5	12	2030
47477	Campylobacter coli APHAP17	UK	NA	chicken	33	39	30	82	104	43	17	828
47479	Campylobacter jejuni APHAP19	UK	NA	chicken	9	2	4	62	4	5	12	2030
47480	Campylobacter jejuni APHAP20	UK	NA	chicken	7	53	2	10	11	3	3	574
47481	Campylobacter coli APHAP21	UK	NA	chicken	427	39	30	82	104	56	17	8391
47482	Campylobacter jejuni APHAP22	UK	NA	chicken	7	2	5	2	10	3	6	5
47483	Campylobacter jejuni APHAP23	UK	NA	chicken	2	1	5	3	2	1	5	19
47484	Campylobacter jejuni APHAP24	UK	NA	chicken	7	28	4	28	17	34	12	573
47485	Campylobacter jejuni APHAP25	UK	NA	chicken	180	194	2	213	19	231	148	2856
47488	Campylobacter jejuni APHAP26	UK	NA	chicken	37	7	10	4	1	7	1	4852
47489	Campylobacter coli APHAP27	UK	NA	chicken	87	39	30	82	104	47	17	8392
47490	Campylobacter coli APHAP29	UK	NA	chicken	33	39	30	82	113	47	17	825
47491	Campylobacter coli APHAP30	UK	NA	chicken	33	39	30	82	104	43	17	828
47492	Campylobacter jejuni APHAP31	UK	NA	chicken	2	4	1	2	7	1	5	48
47493	Campylobacter coli APHAP32	UK	NA	chicken	33	39	30	79	189	44	74	3565
47494	Campylobacter jejuni APHAP33	UK	NA	chicken	9	17	5	10	350	3	3	2274
47495	Campylobacter jejuni APHAP34	UK	NA	chicken	4	7	40	4	42	51	1	267
47496	Campylobacter jejuni APHAP35	UK	NA	chicken	4	7	10	4	1	7	1	45
47497	Campylobacter jejuni APHAP36	UK	NA	chicken	2	75	4	2	141	34	1	6804
47498	Campylobacter coli APHAP37	UK	NA	chicken	33	39	30	82	104	43	17	828
47499	Campylobacter jejuni APHAP38	UK	NA	chicken	7	17	2	15	23	3	12	51
47500	Campylobacter jejuni APHAP39	UK	NA	chicken	1	2	3	4	5	9	3	42
47501	Campylobacter jejuni APHAP40	UK	NA	chicken	7	28	4	28	17	34	12	573
47502	Campylobacter coli APHAP41	UK	NA	chicken	103	39	30	82	189	44	17	4429
47503	Campylobacter coli APHAP42	UK	NA	chicken	103	39	30	82	189	44	17	4429
47504	Campylobacter jejuni APHAP43	UK	NA	chicken	7	28	4	28	17	34	12	573
47506	Campylobacter jejuni APHAP44	UK	NA	chicken	4	7	10	4	42	25	1	538
47510	Campylobacter jejuni APHAP45	UK	NA	chicken	4	7	40	4	42	51	1	267
47513	Campylobacter coli APHAP46	UK	NA	chicken	33	39	30	82	104	44	17	1145
47514	Campylobacter jejuni APHAP47	UK	NA	chicken	24	2	2	2	10	3	3	5136
47515	Campylobacter jejuni APHAP48	UK	NA	chicken	24	2	2	2	10	3	3	5136
47516	Campylobacter jejuni APHAP50	UK	NA	chicken	2	1	12	3	2	1	5	50
47517	Campylobacter jejuni APHAP51	UK	NA	chicken	2	1	12	3	2	1	5	50
47518	Campylobacter jejuni APHAP52	UK	NA	chicken	24	2	2	2	10	3	3	5136
47519	Campylobacter jejuni APHAP53	UK	NA	chicken	2	1	12	3	2	1	5	50
47520	Campylobacter jejuni APHAP54	UK	NA	chicken	7	28	4	28	17	34	12	573
47521	Campylobacter jejuni APHAP55	UK	NA	chicken	7	28	4	28	17	34	12	573
47522	Campylobacter coli APHAP56	UK	NA	chicken	33	39	30	82	104	43	17	828
47523	Campylobacter jejuni APHAP57	UK	NA	chicken	2	4	1	2	7	1	5	48
47524	Campylobacter jejuni APHAP59	UK	NA	chicken	24	2	2	2	10	3	1	464
47525	Campylobacter coli APHAP60	UK	NA	chicken	33	39	30	79	104	35	17	855
47526	Campylobacter coli APHAP64	UK	NA	chicken	33	39	30	139	113	43	17	1774
47527	Campylobacter jejuni APHAP65	UK	NA	chicken	9	2	4	62	4	5	6	257
47528	Campylobacter jejuni APHAP66	UK	NA	chicken	8		2	2	11	12	6
47530	Campylobacter jejuni APHAP68	UK	NA	chicken	77	75	4	48	141	34	1	8393
47531	Campylobacter jejuni APHAP69	UK	NA	chicken	77	75	4	48	141	34	1	8393
47532	Campylobacter jejuni APHAP70	UK	NA	chicken	9	2	4	62	4	5	6	257
47533	Campylobacter jejuni APHAP71	UK	NA	chicken	2	1	12	3	2	1	5	50
47534	Campylobacter jejuni APHAP72	UK	NA	chicken	24	2	2	2	10	3	3	5136
47535	Campylobacter coli APHAP73	UK	NA	chicken	33	39	30	82	113	43	17	829
47536	Campylobacter jejuni APHAP74	UK	NA	chicken	2	1	1	3	7	1	5	104
47537	Campylobacter jejuni APHAP75	UK	NA	chicken	8	17	5	2	10	3	6	4697
47538	Campylobacter jejuni APHAP76	UK	NA	chicken	7	28	4	28	17	34	12	573
47539	Campylobacter jejuni APHAP77	UK	NA	chicken	7	53	2	10	11	3	3	574
47540	Campylobacter jejuni APHAP78	UK	NA	chicken	9	2	4	62	2	5	6	6033
47541	Campylobacter coli APHAP79	UK	NA	chicken	33	39	30	82	104	43	17	828
47542	Campylobacter coli APHAP80	UK	NA	chicken	33	39	103	82	104	43	17	8394
47543	Campylobacter jejuni APHAP81	UK	NA	chicken	9	2	4	62	4	5	6	257
47544	Campylobacter coli APHAP82	UK	NA	chicken	33	39	30	82	113	47	17	825
47545	Campylobacter jejuni APHAP83	UK	NA	chicken	7	28	4	28	17	34	12	573
47546	Campylobacter coli APHAP84	UK	NA	chicken	33	39	30	82	104	43	17	828
47547	Campylobacter coli APHAP85	UK	NA	chicken	33	39	30	82	104	43	17	828
47548	Campylobacter coli APHAP86	UK	NA	chicken	33	38	30	82	104	85	68	887
47549	Campylobacter jejuni APHAP87	UK	NA	chicken	7	17	5	2	10	3	6	353
47550	Campylobacter jejuni APHAP88	UK	NA	chicken	7	28	4	28	17	34	12	573
47551	Campylobacter jejuni APHAP89	UK	NA	chicken	24	2	2	2	10	3	3	5136
47564	Campylobacter jejuni APHAP90	UK	NA	chicken	7	17	2	15	23	3	12	51
47565	Campylobacter coli APHAP91	UK	NA	chicken	33	38	30	79	104	43	17	1595
47566	Campylobacter jejuni APHAP92	UK	NA	chicken	10	81	50	99	120	76	52	677
47567	Campylobacter jejuni APHAP93	UK	NA	chicken	7	71	5	62	11	67	6	449
47568	Campylobacter jejuni APHAP94	UK	NA	chicken	24	21	2	2	2	59	6	2844
47569	Campylobacter jejuni APHAP95	UK	NA	chicken	48	7	10	4	1	7	1	11
47570	Campylobacter coli APHAP96	UK	NA	chicken	33	39	30	82	104	43	17	828
47571	Campylobacter coli APHAP97	UK	NA	chicken	33	39	30	82	104	43	17	828
47573	Campylobacter jejuni APHAP99	UK	NA	chicken	2	1	5	3	2	1	5	19
47574	Campylobacter jejuni APHAP101	UK	NA	chicken	7	2	5	2	10	3	6	5
47575	Campylobacter coli APHAP102	UK	NA	chicken	33	39	30	82	104	43	17	828
47576	Campylobacter jejuni APHAP103	UK	NA	chicken	48	7	10	4	1	7	1	11
47577	Campylobacter jejuni APHAP104	UK	NA	chicken	7	28	4	28	17	34	12	573
47579	Campylobacter coli APHAP107	UK	NA	chicken	124	66	30	79	189	47	17	6795
47580	Campylobacter coli APHAP108	UK	NA	chicken	33	39	30	82	104	43	17	828
47581	Campylobacter jejuni APHAP109	UK	NA	chicken	9	2	4	62	4	133	6	990
47582	Campylobacter jejuni APHAP110	UK	NA	chicken	37	28	120	28	127	3	23	1257
47583	Campylobacter jejuni APHAP111	UK	NA	chicken	4	7	10	4	42	25	1	538
47584	Campylobacter coli APHAP112	UK	NA	chicken	33	39	30	82	104	56	17	827
47585	Campylobacter jejuni APHAP113	UK	NA	chicken	8	2	4	62	4	5	6	2254
47586	Campylobacter coli APHAP114	UK	NA	chicken	33	39	30	82	104	43	17	828
47588	Campylobacter jejuni APHAP116	UK	NA	chicken	7	258	4	28	17	34	12	8395
47589	Campylobacter jejuni APHAP117	UK	NA	chicken	8	10	2	2	11	12	6	354
47590	Campylobacter jejuni APHAP118	UK	NA	chicken	9	2	4	62	4	5	12	2030
47591	Campylobacter jejuni APHAP119	UK	NA	chicken	7	28	4	28	17	34	12	573
47592	Campylobacter coli APHAP120	UK	NA	chicken	33	39	30	82	104	35	17	1058
47593	Campylobacter jejuni APHAP121	UK	NA	chicken	8	2	4	62	4	5	6	2254
47594	Campylobacter jejuni APHAP122	UK	NA	chicken	4	7	41	4	42	7	1	230
47595	Campylobacter jejuni APHAP123	UK	NA	chicken	8	2	4	62	4	5	6	2254
47596	Campylobacter jejuni APHAP124	UK	NA	chicken	8	2	4	62	4	5	6	2254
47597	Campylobacter jejuni APHAP125	UK	NA	chicken	4	7	10	4	42	51	1	583
47598	Campylobacter coli APHAP126	UK	NA	chicken	33	39	30	82	104	43	17	828
47599	Campylobacter coli APHAP127	UK	NA	chicken	33	39	30	82	104	43	17	828
47600	Campylobacter jejuni APHAP128	UK	NA	chicken	8	10	2	2	11	12	6	354
47601	Campylobacter jejuni APHAP129	UK	NA	chicken	9	17	5	10	350	3	3	2274
47602	Campylobacter jejuni APHAP130	UK	NA	chicken	6	4	5	2	2	1	5	122
47603	Campylobacter jejuni APHAP131	UK	NA	chicken	8	10	2	2	11	12	6	354
47604	Campylobacter coli APHAP132	UK	NA	chicken	33	39	30	82	104	43	17	828
47605	Campylobacter jejuni APHAP133	UK	NA	chicken	7	28	4	28	17	34	12	573
47606	Campylobacter jejuni APHAP134	UK	NA	chicken	8	2	4	62	4	5	6	2254
47607	Campylobacter jejuni APHAP135	UK	NA	chicken	8	10	2	2	11	12	6	354
47608	Campylobacter jejuni APHAP136	UK	NA	chicken	9	2	4	62	4	5	12	2030
47609	Campylobacter jejuni APHAP137	UK	NA	chicken	6	4	5	2	2	1	5	122
47610	Campylobacter coli APHAP138	UK	NA	chicken	33	39	30	82	104	43	17	828
47611	Campylobacter coli APHAP139	UK	NA	chicken	33	39	30	79	104	47	17	830
47612	Campylobacter jejuni APHAP140	UK	NA	chicken	2	1	12	3	2	1	5	50
47613	Campylobacter coli APHAP141	UK	NA	chicken	33	39	30	82	104	56	17	827
47614	Campylobacter jejuni APHAP142	UK	NA	chicken	8	10	2	2	11	12	6	354
47615	Campylobacter coli APHAP143	UK	NA	chicken	124	39	30	82	189	47	74	2195
47616	Campylobacter jejuni APHAP144	UK	NA	chicken	24	2	2	2	10	3	3	5136
47617	Campylobacter jejuni APHAP145	UK	NA	chicken	2	4	2	4	19	3	6	658
47618	Campylobacter jejuni APHAP146	UK	NA	chicken	2	1	1	3	2	1	3	262
47619	Campylobacter coli APHAP147	UK	NA	chicken	33	39	30	82	113	47	17	825
47620	Campylobacter jejuni APHAP148	UK	NA	chicken	7	2	5	2	10	3	6	5
47621	Campylobacter coli APHAP149	UK	NA	chicken	33	124	30	82	189	47	325	8329
47622	Campylobacter coli APHAP150	UK	NA	chicken	33	39	30	82	113	47	17	825
47623	Campylobacter jejuni APHAP151	UK	NA	chicken	7	97	5	2	135	68	26	791
47624	Campylobacter jejuni APHAP152	UK	NA	chicken	24	21	2	2	2	59	531	8208
47625	Campylobacter jejuni APHAP153	UK	NA	chicken	8	2	4	62	4	5	6	2254
47626	Campylobacter jejuni APHAP154	UK	NA	chicken	7	71	2	62	11	34	6	5244
47627	Campylobacter jejuni APHAP155	UK	NA	chicken	24	2	2	2	10	3	3	5136
47628	Campylobacter jejuni APHAP156	UK	NA	chicken	7	28	4	28	17	34	12	573
47629	Campylobacter coli APHAP157	UK	NA	chicken	33	39	30	82	104	43	17	828
47630	Campylobacter jejuni APHAP158	UK	NA	chicken	8	2	4	62	4	5	6	2254
47631	Campylobacter jejuni APHAP159	UK	NA	chicken	2	75	4	678	141	34	1	8204
47632	Campylobacter jejuni APHAP160	UK	NA	chicken	8	10	2	2	11	12	6	354
47633	Campylobacter jejuni APHAP161	UK	NA	chicken	37	52	57	26	107	29	23	991
47634	Campylobacter jejuni APHAP162	UK	NA	chicken	24	2	2	2	10	3	3	5136
47635	Campylobacter jejuni APHAP163	UK	NA	chicken	431	28	4	28	17	34	12	8116
47636	Campylobacter jejuni APHAP164	UK	NA	chicken	2	28	120	28	127	3	23	8396
47637	Campylobacter jejuni APHAP165	UK	NA	chicken	8	2	4	62	4	5	6	2254
47638	Campylobacter coli APHAP166	UK	NA	chicken	33	39	30	82	104	43	17	828
47639	Campylobacter jejuni APHAP167	UK	NA	chicken	8	10	2	2	11	12	6	354
47640	Campylobacter jejuni APHAP168	UK	NA	chicken	8	1	6	3	2	1	1	44
47641	Campylobacter jejuni APHAP169	UK	NA	chicken	4	7	10	4	42	51	1	583
47642	Campylobacter coli APHAP170	UK	NA	chicken	33	39	30	79	104	47	17	830
47643	Campylobacter jejuni APHAP171	UK	NA	chicken	9	2	4	62	4	5	6	257
47644	Campylobacter coli APHAP172	UK	NA	chicken	33	39	30	139	113	43	17	1774
47645	Campylobacter jejuni APHAP173	UK	NA	chicken	4	7	10	4	42	7	1	137
47646	Campylobacter jejuni APHAP174	UK	NA	chicken	2	1	1	3	2	1	5	21
47647	Campylobacter coli APHAP175	UK	NA	chicken	33	39	30	79	104	35	17	855
47648	Campylobacter coli APHAP176	UK	NA	chicken	33	39	30	139	113	47	17	4425
47649	Campylobacter jejuni APHAP177	UK	NA	chicken	2	1	21	3	2	1	5	53
47650	Campylobacter coli APHAP178	UK	NA	chicken	33	176	30	731	887	43	17	8820
47651	Campylobacter jejuni APHAP179	UK	NA	chicken	2	10	2	4	19	3	6	1044
47652	Campylobacter jejuni APHAP180	UK	NA	chicken	2	75	4	48	141	34	1	814
51882	Campylobacter jejuni APHAP58	UK	NA	chicken	1	2	3	4	5	9	3	42
51883	Campylobacter jejuni APHAP62	UK	NA	chicken	8	10	2	2	11	12	6	354
51884	Campylobacter jejuni APHAP63	UK	NA	chicken	2	75	4	48	141	34	1	814
56172	Campylobacter jejuni APHAP100	UK	NA	chicken	4	7	73	4	1	7	1	845

## Sheet: cjejunicoli_MLSTar
Supplemental Table S2 (cont.). Campylobacter jejuni/coli genomes typed using MLSTar.
BIGSdb_id	aspA	glnA	gltA	glyA	pgm	tkt	uncA	ST
46300_APHAP1	124	39	30	82	189	47	74	2195
47327_APHAP2	24	2	2	2	10	3	3	5136
47338_APHAP3	33	39	30	82	113	47	17	825
47349_APHAP4	7	17	2	2	23	3	12	4243
47351_APHAP5	9	2	4	62	4	5	6	257
47358_APHAP6	33	39	30	82	104	43	17	828
47467_APHAP7	7	17	2	15	23	3	12	51
47468_APHAP8	33	39	30	391	104	47	17	4422
47469_APHAP9	2	10	2	4	19	3	6	1044
47470_APHAP10	4	7	10	4	1	7	1	45
47471_APHAP11	9	2	4	62	4	5	6	257
47472_APHAP12	9	2	4	62	4	5	6	257
47473_APHAP13	7	28	4	28	17	34	12	573
47474_APHAP14	9	2	4	62	4	5	6	257
47475_APHAP15	7	28	4	28	17	34	12	573
47476_APHAP16	9	2	4	62	4	5	12	2030
47477_APHAP17	33	39	30	82	104	43	17	828
47479_APHAP19	9	2	4	62	4	5	12	2030
47480_APHAP20	7	53	2	10	11	3	3	574
47481_APHAP21	427	39	30	82	104	56	17	8391
47482_APHAP22	7	2	5	2	10	3	6	5
47483_APHAP23	2	1	5	3	2	1	5	19
47484_APHAP24	7	28	4	28	17	34	12	573
47485_APHAP25	180	194	2	213	19	231	148	2856
47488_APHAP26	37	7	10	4	1	7	1	4852
47489_APHAP27	87	39	30	82	104	47	17	8392
47490_APHAP29	33	39	30	82	113	47	17	825
47491_APHAP30	33	39	30	82	104	43	17	828
47492_APHAP31	2	4	1	2	7	1	5	48
47493_APHAP32	33	39	30	79	189	44	74	3565
47494_APHAP33	9	17	5	10	350	3	3	2274
47495_APHAP34	4	7	40	4	42	51	1	267
47496_APHAP35	4	7	10	4	1	7	1	45
47497_APHAP36	2	75	4	2	141	34	1	6804
47498_APHAP37	33	39	30	82	104	43	17	828
47499_APHAP38	7	17	2	15	23	3	12	51
47500_APHAP39	1	2	3	4	5	9	3	42
47501_APHAP40	7	28	4	28	17	34	12	573
47502_APHAP41	103	39	30	82	189	44	17	4429
47503_APHAP42	103	39	30	82	189	44	17	4429
47504_APHAP43	7	28	4	28	17	34	12	573
47506_APHAP44	4	7	10	4	42	25	1	538
47510_APHAP45	4	7	40	4	42	51	1	267
47513_APHAP46	33	39	30	82	104	44	17	1145
47514_APHAP47	24	2	2	2	10	3	3	5136
47515_APHAP48	24	2	2	2	10	3	3	5136
47516_APHAP50	2	1	12	3	2	1	5	50
47517_APHAP51	2	1	12	3	2	1	5	50
47518_APHAP52	24	2	2	2	10	3	3	5136
47519_APHAP53	2	1	12	3	2	1	5	50
47520_APHAP54	7	28	4	28	17	34	12	573
47521_APHAP55	7	28	4	28	17	34	12	573
47522_APHAP56	33	39	30	82	104	43	17	828
47523_APHAP57	2	4	1	2	7	1	5	48
47524_APHAP59	24	2	2	2	10	3	1	464
47525_APHAP60	33	39	30	79	104	35	17	855
47526_APHAP64	33	39	30	139	113	43	17	1774
47527_APHAP65	9	2	4	62	4	5	6	257
47528_APHAP66	8	393	2	2	11	12	6	NA
47530_APHAP68	77	75	4	48	141	34	1	8393
47531_APHAP69	77	75	4	48	141	34	1	8393
47532_APHAP70	9	2	4	62	4	5	6	257
47533_APHAP71	2	1	12	3	2	1	5	50
47534_APHAP72	24	2	2	2	10	3	3	5136
47535_APHAP73	33	39	30	82	113	43	17	829
47536_APHAP74	2	1	1	3	7	1	5	104
47537_APHAP75	8	17	5	2	10	3	6	4697
47538_APHAP76	7	28	4	28	17	34	12	573
47539_APHAP77	7	53	2	10	11	3	3	574
47540_APHAP78	9	2	4	62	2	5	6	6033
47541_APHAP79	33	39	30	82	104	43	17	828
47542_APHAP80	33	39	103	82	104	43	17	8394
47543_APHAP81	9	2	4	62	4	5	6	257
47544_APHAP82	33	39	30	82	113	47	17	825
47545_APHAP83	7	28	4	28	17	34	12	573
47546_APHAP84	33	39	30	82	104	43	17	828
47547_APHAP85	33	39	30	82	104	43	17	828
47548_APHAP86	33	38	30	82	104	85	68	887
47549_APHAP87	7	17	5	2	10	3	6	353
47550_APHAP88	7	28	4	28	17	34	12	573
47551_APHAP89	24	2	2	2	10	3	3	5136
47564_APHAP90	7	17	2	15	23	3	12	51
47565_APHAP91	33	38	30	79	104	43	17	1595
47566_APHAP92	10	81	50	99	120	76	52	677
47567_APHAP93	7	71	5	62	11	67	6	449
47568_APHAP94	24	21	2	2	2	59	6	2844
47569_APHAP95	48	7	10	4	1	7	1	11
47570_APHAP96	33	39	30	82	104	43	17	828
47571_APHAP97	33	39	30	82	104	43	17	828
47573_APHAP99	2	1	5	3	2	1	5	19
47574_APHAP101	7	2	5	2	10	3	6	5
47575_APHAP102	33	39	30	82	104	43	17	828
47576_APHAP103	48	7	10	4	1	7	1	11
47577_APHAP104	7	28	4	28	17	34	12	573
47579_APHAP107	124	66	30	79	189	47	17	6795
47580_APHAP108	33	39	30	82	104	43	17	828
47581_APHAP109	9	2	4	62	4	133	6	990
47582_APHAP110	37	28	120	28	127	3	23	1257
47583_APHAP111	4	7	10	4	42	25	1	538
47584_APHAP112	33	39	30	82	104	56	17	827
47585_APHAP113	8	2	4	62	4	5	6	2254
47586_APHAP114	33	39	30	82	104	43	17	828
47588_APHAP116	7	258	4	28	17	34	12	8395
47589_APHAP117	8	10	2	2	11	12	6	354
47590_APHAP118	9	2	4	62	4	5	12	2030
47591_APHAP119	7	28	4	28	17	34	12	573
47592_APHAP120	33	39	30	82	104	35	17	1058
47593_APHAP121	8	2	4	62	4	5	6	2254
47594_APHAP122	4	7	41	4	42	7	1	230
47595_APHAP123	8	2	4	62	4	5	6	2254
47596_APHAP124	8	2	4	62	4	5	6	2254
47597_APHAP125	4	7	10	4	42	51	1	583
47598_APHAP126	33	39	30	82	104	43	17	828
47599_APHAP127	33	39	30	82	104	43	17	828
47600_APHAP128	8	10	2	2	11	12	6	354
47601_APHAP129	9	17	5	10	350	3	3	2274
47602_APHAP130	6	4	5	2	2	1	5	122
47603_APHAP131	8	10	2	2	11	12	6	354
47604_APHAP132	33	39	30	82	104	43	17	828
47605_APHAP133	7	28	4	28	17	34	12	573
47606_APHAP134	8	2	4	62	4	5	6	2254
47607_APHAP135	8	10	2	2	11	12	6	354
47608_APHAP136	9	2	4	62	4	5	12	2030
47609_APHAP137	6	4	5	2	2	1	5	122
47610_APHAP138	33	39	30	82	104	43	17	828
47611_APHAP139	33	39	30	79	104	47	17	830
47612_APHAP140	2	1	12	3	2	1	5	50
47613_APHAP141	33	39	30	82	104	56	17	827
47614_APHAP142	8	10	2	2	11	12	6	354
47615_APHAP143	124	39	30	82	189	47	74	2195
47616_APHAP144	24	2	2	2	10	3	3	5136
47617_APHAP145	2	4	2	4	19	3	6	658
47618_APHAP146	2	1	1	3	2	1	3	262
47619_APHAP147	33	39	30	82	113	47	17	825
47620_APHAP148	7	2	5	2	10	3	6	5
47621_APHAP149	33	124	30	82	189	47	325	8329
47622_APHAP150	33	39	30	82	113	47	17	825
47623_APHAP151	7	97	5	2	135	68	26	791
47624_APHAP152	24	21	2	2	2	59	531	8208
47625_APHAP153	8	2	4	62	4	5	6	2254
47626_APHAP154	7	71	2	62	11	34	6	5244
47627_APHAP155	24	2	2	2	10	3	3	5136
47628_APHAP156	7	28	4	28	17	34	12	573
47629_APHAP157	33	39	30	82	104	43	17	828
47630_APHAP158	8	2	4	62	4	5	6	2254
47631_APHAP159	2	75	4	678	141	34	1	8204
47632_APHAP160	8	10	2	2	11	12	6	354
47633_APHAP161	37	52	57	26	107	29	23	991
47634_APHAP162	24	2	2	2	10	3	3	5136
47635_APHAP163	431	28	4	28	17	34	12	8116
47636_APHAP164	2	28	120	28	127	3	23	8396
47637_APHAP165	8	2	4	62	4	5	6	2254
47638_APHAP166	33	39	30	82	104	43	17	828
47639_APHAP167	8	10	2	2	11	12	6	354
47640_APHAP168	8	1	6	3	2	1	1	44
47641_APHAP169	4	7	10	4	42	51	1	583
47642_APHAP170	33	39	30	79	104	47	17	830
47643_APHAP171	9	2	4	62	4	5	6	257
47644_APHAP172	33	39	30	139	113	43	17	1774
47645_APHAP173	4	7	10	4	42	7	1	137
47646_APHAP174	2	1	1	3	2	1	5	21
47647_APHAP175	33	39	30	79	104	35	17	855
47648_APHAP176	33	39	30	139	113	47	17	4425
47649_APHAP177	2	1	21	3	2	1	5	53
47650_APHAP178	33	176	30	731	887	43	17	8820
47651_APHAP179	2	10	2	4	19	3	6	1044
47652_APHAP180	2	75	4	48	141	34	1	814
51882_APHAP58	1	2	3	4	5	9	3	42
51883_APHAP62	8	10	2	2	11	12	6	354
51884_APHAP63	2	75	4	48	141	34	1	814
56172_APHAP100	4	7	73	4	1	7	1	845

[truncated: 10 more sheets: kpneumoniae_BIGSdb, kpneumoniae_MLSTar, sagalactiae_BIGSdb, sagalactiae_MLSTar, hpylori_BIGSdb, hpylori_MLSTar, bpseudomallei_BIGSdb, bpseudomallei_MLSTar, paeruginosa_BIGSdb, paeruginosa_MLSTar]
