# Supplementary material for: MLSTar: automatic multilocus sequence typing of bacterial genomes in R
Source: PeerJ. 2018 Jun 15;6:e5098. doi: 10.7717/peerj.5098 (PMC6005169; doi:10.7717/peerj.5098)
Supplement: Supplemental Information 3 — Comparison of MLSTar using closely related species. [file peerj-06-5098-s003.xlsx]

## Sheet: Sheet1
Supplemental Table S3. Comparison of MLSTar using MLST schemes from close species.
Dataset	Genomes	C. concisus/curvus	C. fetus	C. helveticus	C. hyointestinalis	C. insulaenigrae	C. lanienae	C. lari	C. sputorum	C. upsaliensis	C. jejuni/coli
C. jejuni/coli	172	0	0	0	0	0	0	0	0	0	NA
C. fetus	182	0	NA	0	0	0	0	0	0	0	0
